# Supplementary material for: Mansonella ozzardi corneal lesions in the Amazon: a cross-sectional study
Source: PubMed Central journal article supplement — BMJ Open. 2012 Nov 26;2(6):e001266. doi: 10.1136/bmjopen-2012-001266 (PMC3533123; doi:10.1136/bmjopen-2012-001266), 2012-11-26
Supplement: bmjopen-2012-001266.draft_revisions.pdf [file bmjopen-2012-001266.draft_revisions.pdf]

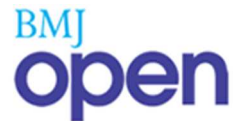

**Mansonella ozzardi corneal lesions in the Amazon: a cross-sectional study**

|                                 |                                                                                                                                                                                                                                                                                                                                                                                                               |
|---------------------------------|---------------------------------------------------------------------------------------------------------------------------------------------------------------------------------------------------------------------------------------------------------------------------------------------------------------------------------------------------------------------------------------------------------------|
| Journal:                        | <i>BMJ Open</i>                                                                                                                                                                                                                                                                                                                                                                                               |
| Manuscript ID:                  | bmjopen-2012-001266                                                                                                                                                                                                                                                                                                                                                                                           |
| Article Type:                   | Research                                                                                                                                                                                                                                                                                                                                                                                                      |
| Date Submitted by the Author:   | 22-Apr-2012                                                                                                                                                                                                                                                                                                                                                                                                   |
| Complete List of Authors:       | Vianna, Lucas; UNIFESP, Ophthalmology<br>Martins, Marilaine; Fundação de Medicina Tropical do Amazonas, State University Amazonas, Parasithology<br>Cohen, Jacob; Federal University of Amazonas / Instituto de Oftalmologia de Manaus, Ophthalmology<br>Cohen, Marcos; Federal University of Amazonas / Instituto de Oftalmologia de Manaus, Ophthalmology<br>Belfort Junior, Rubens; UNIFESP, Ophthalmology |
| <b>Primary Subject Heading</b>: | Addiction                                                                                                                                                                                                                                                                                                                                                                                                     |
| Secondary Subject Heading:      | Ophthalmology                                                                                                                                                                                                                                                                                                                                                                                                 |
| Keywords:                       | OPHTHALMOLOGY, Corneal and external diseases < OPHTHALMOLOGY, PARASITOLOGY                                                                                                                                                                                                                                                                                                                                    |
|                                 |                                                                                                                                                                                                                                                                                                                                                                                                               |

SCHOLARONE™  
Manuscripts

1  
2  
3  
4  
5  
6  
7  
8  
9  
10  
11  
12  
13  
14  
15  
16  
17  
18  
19  
20  
21  
22  
23  
24  
25  
26  
27  
28  
29  
30  
31  
32  
33  
34  
35  
36  
37  
38  
39  
40  
41  
42  
43  
44  
45  
46  
47  
48  
49  
50  
51  
52  
53  
54  
55  
56  
57  
58  
59  
60

1) **Title Page:**

**Mansonella ozzardi corneal lesions in the Amazon: a cross-sectional study**

**Authors:** Lucas Monferrari Monteiro Vianna (first author)\*; Marilaine Martins\*\*; Marcos Jacob Cohen\*\*\*, Jacob Cohen\*\*\*, Rubens Belfort Jr\*

\*Vision Institute and Department of Ophthalmology. Hospital São Paulo - Federal University of São Paulo. Address: Botucatu St, 821 – ZIP: 04023-900 – São Paulo/SP - Brazil

\*\* Fundação de Medicina Tropical do Amazonas, Universidade do Estado do Amazonas. Address: Pedro Teixeira Av., 25 - ZIP: 69040-000 - Manaus/AM - Brazil

\*\*\* Universidade Federal do Amazonas (UFAM) / Instituto de Oftalmologia de Manaus (IOM). Address: General Rodrigo Octávio Jordão Ramos Av, 3000, Campus Universitário, Coroado I - 69077-000 - Manaus/AM – Brazil

**Keywords:** Mansonella, microfilaria, keratitis, microscopy, confocal, biopsy



Lucas Monferrari Monteiro Vianna, MD (Corresponding Author)

Department of Ophthalmology / Federal University of Sao Paulo, Sao Paulo, Brazil

Phone: 55-11-7493-8000 - Fax: 55-11-5085-2010 ([lucasmvianna@yahoo.com.br](mailto:lucasmvianna@yahoo.com.br))

## **Article Summary**

### **Article Focus**

- To describe corneal lesions that can be related to the presence of M. ozzardi microfilaremia.
- To describe corneal confocal microscopy images that can be related to the presence of M. ozzardi microfilaremia.
- To correlate ophthalmologic clinical signs with the presence of microfilaremia in some patients.

### **Key Messages**

- There are some biomicroscopic and corneal confocal microscopy evidences of the presence of *M. ozzardi* microfilariae in the cornea.
- The *M. ozzardi* microfilaria can be pathogenic to the eye.
- Further studies using ocular tissue PCR and other image techniques can be helpful.

### **Strengths and Limitations.**

- The major strength is that the study describe a very prevalent but not well studied disease in a very difficult access area of Brasil.
- Another strength is that this is the first description of *M. ozzardi* corneal lesions using confocal microscopy.

1  
2  
3  
4  
5  
6  
7  
8  
9  
10  
11  
12  
13  
14  
15  
16  
17  
18  
19  
20  
21  
22  
23  
24  
25  
26  
27  
28  
29  
30  
31  
32  
33  
34  
35  
36  
37  
38  
39  
40  
41  
42  
43  
44  
45  
46  
47  
48  
49  
50  
51  
52  
53  
54  
55  
56  
57  
58  
59  
60

- The major limitation is the absence of a similar control group and follow up of the patients due to work field access difficulties.

**Relevant Subject Headings:** mansonella, microfilariaemia, corneal lesions, confocal microscopy.

For peer review only

## **Mansonella ozzardi corneal lesions in the Amazon: a cross-sectional study**

### **Abstract:**

**Objectives:** To characterize and confirm the presence of *Mansonella ozzardi* microfilariae in the cornea by biomicroscopy and corneal confocal microscopy.

**Design:** Cross-sectional study.

**Setting:** Clinical practice study in the Amazon.

**Participants:** Two hundred and twelve consecutive volunteers patients from communities of the rural area of Coari City in the Solimões River, Amazonas State, Brazil.

**Interventions:** Complete eye examination, blood checked for the presence of microfilariae, corneal confocal microscopy (CCME) evaluation and biopsy of ocular tissues.

**Primary and secondary outcome measures:** Positive correlation between corneal biomicroscopic and confocal lesions with *M. ozzardi* microfilaremia.

**Results:** Of the 212 patients, 56 (26,4%) were positive for microfilaremia. By flash light examination, 22 patients that had suspicious corneal lesions were sent to biomicroscopy and CCME. At biomicroscopy, lesions were divided in quiescent and active. At CCME, they were divided in circular and filiform lesions. The associations between lesions and microfilaremia are shown.

1  
2  
3 Conclusions: We presented some evidences of the presence of *M. ozzardi* microfilariae  
4  
5 in the cornea and its pathogenicity to the eye. Further studies using ocular tissue PCR  
6  
7 and other image techniques can be helpful.  
8  
9

10  
11  
12  
13  
14 **Statements:**

15  
16  
17 Data sharing statement: there is no additional data available.  
18  
19

20  
21 Funding statement: this work was supported by FAPESP (Fundação de Amparo à  
22  
23 Pesquisa do Estado de São Paulo or Foundation for Research Support of São Paulo  
24  
25 State).  
26  
27

28  
29 Competing Interests Statement: we state that none of the authors have competing  
30  
31 interests.  
32

33  
34 Contributorship Statement: we state that all authors contributed in the:

- 35  
36 1) Conception and design of the study;  
37  
38 2) Acquisition, analysis and interpretation of data;  
39  
40 3) Drafting and revising of the article;  
41  
42 4) Final approval of the version to be published.  
43  
44  
45  
46  
47  
48  
49  
50  
51  
52  
53  
54  
55  
56  
57  
58  
59  
60

## 2) Main Text:

### Introduction

Hundreds of types of filariae have been described and a few can cause infections in humans, being *Mansonella ozzardi* one of them and the first description of *M. ozzardi* associated with corneal disease was published in 1998.<sup>1</sup>

*M. ozzardi* is a filaria exclusively found in America and one of the causes of mansonelliasis.<sup>2</sup> In Brazil it is found in the states of Roraima, Mato Grosso and Amazonas.<sup>3,4,5</sup> The microfilariae of *M. ozzardi* are found in peripheral blood and can be identified by their morphological characteristics or by molecular biology.<sup>6,7</sup>

The clinical features of mansonelliasis are not well described. Infected individuals are generally asymptomatic or have signs and symptoms common to other infections such as fever, coldness in the legs, joint pain and headache.<sup>8</sup> They may also include skin and ocular lesions<sup>1,9,10</sup> and be associated with *Wolbachiae*, that are bacterial endosymbionts of insects and many filarial nematodes and their products trigger inflammatory responses<sup>10</sup>.

Coari City, at Solimões River (04°08'S63°07'W) has a high prevalence of *M. ozzardi* infection. Studies showed average infection rate between 13.3% and 18.9%, with higher prevalence in rural areas and patient aging.<sup>2, 10</sup> Onchocerciasis does not exist in this region of the Amazon.<sup>12</sup>

## Materials and Methods

Cross-sectional, clinical practice study of 212 consecutive volunteers patients from communities of the rural area of Coari City in the Solimões River, Amazonas State, Brazil. All patients had the eyes examined using a flash light and had blood checked for the presence of microfilariae by expert microscopist. The infection by *M. ozzardi* was determined by light-microscopy examination (200x and 400x) of Giemsa-stained thick smears of peripheral blood obtained by digital puncture with a sterile disposable lancet<sup>6</sup> and by a new identification protocol using the polymerase chain reaction (PCR) (M Martins et al., unpublished observations). Patients with suspicious corneal lesions at the eye exam were submitted to biomicroscopy, fundoscopy and corneal confocal microscopy evaluation (CCME), using the Rostock Cornea Module (RCM) of the Heidelberg Retina Tomograph. Photographs were taken at the slit lamp. CCME was performed in the central cornea and in the corneal regions with the suspected lesions. Two patients underwent biopsy of the limbal conjunctiva adjacent to the suspicious corneal lesions area and blood was collected from the surgical wound for microfilariae investigation by thick blood examination.

## Results

Of the 212 patients, 56 (26,4%) were positive for microfilaremia. By flash light examination, 22 patients that had suspicious corneal lesions were sent to biomicroscopy and CCME. The association between microfilaremia and cornea lesions is shown in table 1.



Table 1. Association between microfilaremia and corneal lesions.

| <b>Corneal Lesions (horizontal)</b> | <b>Presence<br/>(+)</b> | <b>Absence<br/>(-)</b> | <b>Total</b> |
|-------------------------------------|-------------------------|------------------------|--------------|
| <b>Microfilaremia (vertical)</b>    |                         |                        |              |
| <b>Positive (+)</b>                 | 14 (63,6%)              | 42 (22%)               | 56           |
| <b>Negative (-)</b>                 | 8 (33,4%)               | 148 (88%)              | 156          |
| <b>Total</b>                        | 22                      | 190                    | 212 (100%)   |

At biomicroscopy, some lesions were characterized as nummular, mid periphery and anterior stroma corneal opacities, 0.5 to 1.0 mm in diameter with central mottled surrounded by a opaque halo, with marked limit between the white opacity and the clear cornea. Other lesions were characterized by nummular keratitis, also located at mid periphery and anterior stroma. In all cases there was a normal translucent area between the corneal lesions and the limbus and absence of corneal neovascularization or other changes (Picture 1). The clinical characteristics of the lesions as well as the high prevalence exclude the possibility of traumas and other known causes for the differential diagnosis, specifically Onchocercosis. The association between nummular keratitis and microfilaremia is shown in table 2.

Table 2. Association between nummular keratitis and microfilaremia.

| <b>Keratitis lesions (horizontal)</b> | <b>Presence</b> | <b>Absence</b> | <b>Total</b> |
|---------------------------------------|-----------------|----------------|--------------|
| <b>Microfilaremia (vertical)</b>      | <b>(+)</b>      | <b>(-)</b>     |              |
| <b>Positive (+)</b>                   | 10 (76,9%)      | 4 (44%)        | 14           |
| <b>Negative (-)</b>                   | 3 (23,1%)       | 5 (56%)        | 8            |
| <b>Total</b>                          | 13              | 9              | 22 (100%)    |

Among the 22 patients with corneal lesions at biomicroscopy, 12 presented suspected related lesions also at the CCME. These confocal suspected lesions was presented in two patterns: circular (increased reflectivity, measuring about 80 micra in diameter, located at the sub-epithelial level, as shown in picture 2) and linear (filiform lesions ranging from 250 to 300  $\mu\text{m}$  in length and 10 to 15  $\mu\text{m}$  wide, with one "C" shape end and the other tapered, as shown in picture 3). Five patients presented only circular lesions, one patient only linear lesions and six patients had both of them. The association between confocal lesions and microfilaremia is shown in table 3.

Table 3. Association between confocal lesions and microfilaremia.

| <b>Confocal lesion (horizontal)</b> | <b>Presence (+)</b>               | <b>Absence</b> | <b>Total</b> |
|-------------------------------------|-----------------------------------|----------------|--------------|
| <b>Microfilaremia (vertical)</b>    | <b>% Circular / Linear / Both</b> | <b>(-)</b>     |              |
| <b>Positive (+)</b>                 | 2 (25%) / 1 (12,5%) / 5 (62,5%)   | 6              | 14           |
| <b>Negative (-)</b>                 | 3 (75%) / 0 / 1 (25%)             | 4              | 8            |
|                                     | 12                                | 10             | 22           |

1  
2  
3 In two volunteers patients with linear lesions, thick blood smear of the limbal conjunctiva  
4 was performed and confirmed the microfilaremia. Picture 4 compares microfilaria of *M.*  
5  
6  
7  
8 *ozzardi* seen at the thick blood smear with the confocal microscopy image.  
9

10 The study was prospective approved by the UNIFESP Ethical Committee. All  
11  
12 participants signed the protocol's informed consent.  
13

14 Acknowledgement for Funding/Support to FAPESP (Fundação de Amparo à Pesquisa  
15  
16 do Estado de São Paulo or Foundation for Research Support of São Paulo State) and  
17  
18 for technical support for *Mansonella*-Brazil Group (Belfort Jr RB, Borborema M, Cohen  
19  
20 J, Cohen MJ, Cunha P, Fontes G, Martins M, Medeiros JF, Pessoa, FAC, Vianna LMM,  
21  
22 Zanelato T).  
23  
24  
25  
26  
27  
28  
29  
30

### 31 Discussion

32  
33

34 The prevalence of *M. ozzardi* is high in some riverside communities in Amazon with the  
35  
36 increasing occupation of rainforest areas.<sup>2,12</sup> Previous studies in Coari city showed an  
37  
38 average infection rate between 13.3% and 18.9%, with higher prevalence in rural areas  
39  
40 and patient aging.<sup>2, 10</sup> In the present study, the prevalence rate was of 26,4%.  
41  
42

43 Presumed keratitis caused by *M. ozzardi* has been described in Brazil by us as well as  
44  
45 other authors, with no other defined etiology related.<sup>1,9,10</sup> A comparison with other filarial  
46  
47 diseases shows some similarities with onchocerciasis but there is not onchocerciasis  
48  
49 in that parts of Brazil and also the clinical picture is different. Onchocerciasis has been  
50  
51 excluded by the characteristics of the microfilaria tail and because it exists in Brazil only  
52  
53  
54  
55  
56  
57  
58  
59  
60

1  
2  
3 close to the Venezuela border.<sup>13</sup> None of the patients lived or visited areas where  
4  
5 Onchocerca exists.  
6

7  
8 A study conducted in Pauini, at the Purus River revealed 20 non-Indian habitants with  
9  
10 peripheral corneal opacities among 524 patients examined. No microfilariae were seen  
11  
12 in the skin snips and *Mansonella sp* was found in the blood of the 2 patients where it  
13  
14 was possible to collect blood.<sup>1</sup> Another study, conducted in São Gabriel da Cachoeira  
15  
16 (Negro River) showed a positive association between *M. ozzardi* and corneal lesions  
17  
18 with all patients presenting ocular changes having *M. ozzardi* microfilariae in blood  
19  
20 samples.<sup>9</sup> All the skin biopsies were negative for microfilaria including *Onchocerca*. The  
21  
22 association between the keratitis and positive microfilaremia in the Amazon was also  
23  
24 related by Cohen et al.<sup>10</sup> In our study, this association was also found, as shown in table  
25  
26  
27 1.  
28  
29

30  
31 The aspect of corneal lesions was divided by its characteristics in only corneal opacities  
32  
33 and keratitis, as shown in picture 1. Among patients positive for microfilaremia, the  
34  
35 proportion of keratitis aspect seems to be higher and among patients negative for  
36  
37 microfilaria, the proportion of only opacity aspect was higher (table 2). One explanation  
38  
39 for the presence of patients with keratitis lesion and negative microfilaremia could be  
40  
41 false negatives in the blood tests. Patients with only opacity lesion and positive  
42  
43 microfilaremia could be explained by chronic infection.  
44  
45  
46

47  
48 Like in previous studies,<sup>1,9,10</sup> we could not detect, by biomicroscopy, filariae in any  
49  
50 ocular tissue, but corneal lesions similar to previous descriptions were found. Using  
51  
52 CCME, we detected not previously described lesions. Among patients positive for  
53  
54 microfilaremia, the proportion of confocal lesions was higher (table 3). The confocal  
55  
56  
57  
58  
59  
60

1  
2  
3 lesions were divided by their aspects in linear and circular. Among patients with lesions  
4 identified by CCME, there was a higher proportion of patients positive for microfilaremia  
5 and a higher proportion of circular aspect alone among patients negative for  
6 microfilaremia (table 3). It could suggest that linear lesions are associated with active  
7 disease and circular lesions with inflammatory scars, associated or not with active  
8 disease. The size of linear lesions (250-300 microns) on CCME was higher than  
9 showed in microbiological studies (149-240 microns)<sup>6</sup>. The microfilariae are probably  
10 dead in ocular tissues and could enlarge due to inflammatory reaction. Circular lesions  
11 could represent, besides inflammatory reaction surrounding dead microfilariae, cross  
12 section of remnants of adult worms (26 to 49 mm in length by 0.07 to 0.15 mm in  
13 diameter)<sup>6</sup>.

14  
15  
16  
17  
18  
19  
20  
21  
22  
23  
24  
25  
26  
27  
28  
29  
30  
31  
32 Unaffected patients were not tested due to difficulties of field work. We performed  
33 random CCME of some affected patient's fellow eyes with no biomicroscopy lesions  
34 and no similar alterations were detected.

### 35 36 37 38 39 40 41 Conclusion

42  
43 We presented some evidences of the presence of *M. ozzardi* microfilariae in the cornea  
44 and its pathogenicity to the eye. Further studies using ocular tissue PCR and other  
45 image techniques can be helpful.  
46  
47  
48  
49  
50  
51  
52  
53  
54  
55  
56  
57  
58  
59  
60

1  
2  
3  
4  
5  
6  
7  
8  
9  
10  
11  
12  
13  
14  
15  
16  
17  
18  
19  
20  
21  
22  
23  
24  
25  
26  
27  
28  
29  
30  
31  
32  
33  
34  
35  
36  
37  
38  
39  
40  
41  
42  
43  
44  
45  
46  
47  
48  
49  
50  
51  
52  
53  
54  
55  
56  
57  
58  
59  
60

#### 4) References:

1. Branco BC, Chamon W, Belfort R et al. Ocular findings in Pauini (Southwest of the Brazilian Amazon) and possible corneal lesions caused by Mansonella. *Arq Bras Oftalmol.* 1998; Vol 61(6): 647-82.
2. Martins M, Pessoa FA, de Medeiros MB, et al. Mansonella ozzardi in Amazonas, Brazil: prevalence and distribution in the municipality of Coari, in the middle Solimões River. *Mem Inst Oswaldo Cruz.* 2010 May;105(3):246-53.
3. Deane MP. Sobre a incidência de filárias humanas em Manaus, estado do Amazonas. *Rev Serv Esp Saude Publ* 1949 2: 849-858.
4. Oliveira wr. [Filarial infestation in inhabitants of Vila Pereira, territory of Roraima (Brazil)]. *Rev Inst Med Trop Sao Paulo.* 1963 Nov-Dec;5:287-8.
5. D'Andretta Jr, Pio da Silva CM, Kameyana F. Ocorrência da mansonelose entre índios do alto Xingu. *Rev Soc Bras Med Trop* 1969. 3:11.
6. Orihel TC, Eberhard ML. Mansonella ozzardi: a redescription with comments on its taxonomic relationships. *Am J Trop Med Hyg.* 1982 Nov;31(6):1142-7.
7. Morales-Hojas R, Post RJ, Shelley AJ, et al. Characterisation of nuclear ribosomal DNA sequences from *Onchocerca volvulus* and *Mansonella ozzardi* (Nematoda: Filarioidea) and development of a PCR-based method for their

1  
2  
3 detection in skin biopsies. *Int J Parasitol*. 2001 Feb;31(2):169-77. Erratum in: *Int*  
4  
5  
6 *J Parasitol* 2001 Jun;31(8):850-1

- 7  
8  
9  
10 8. BATISTA D, CERQUEIRA NL, MORAES MA. [Epidemiology of Manson's  
11 disease in a locality in the interior of Amazonas]. *Rev Assoc Med Bras*. 1960  
12  
13 Jun;6:176-84.  
14  
15  
16  
17  
18  
19  
20 9. Garrido C, Campos M. First report of presumed parasitic keratitis in Indians  
21 from the Brazilian Amazon. *Cornea*. 2000 Nov;19(6):817-9.  
22  
23  
24  
25  
26  
27  
28 10. Cohen JM, Ribeiro JA, Martins M. [Ocular manifestations in mansonelliasis].  
29 *Arq Bras Oftalmol*. 2008 Mar-Apr;71(2):167-71. Portuguese.  
30  
31  
32  
33  
34  
35  
36 11. Keiser PB, Coulibaly Y, Kubofcik J, et al. Molecular identification of Wolbachia  
37 from the filarial nematode *Mansonella perstans*. *Mol Biochem Parasitol*. 2008  
38 Aug;160(2):123-8. Epub 2008 May 2. PubMed PMID: 18538871; PubMed  
39 Central PMCID: PMC2497444.  
40  
41  
42  
43  
44  
45  
46  
47 12. Medeiros JF, Py-Daniel V, Barbosa UC, et al. [Occurrence of *Mansonella*  
48 *ozzardi* (Nematoda, Onchocercidae) in riverine communities of the Purus river,  
49 Boca do Acre municipality, Amazonas State, Brazil]. *Cad Saude Publica*. 2009  
50 Jun;25(6):1421-6.  
51  
52  
53  
54  
55  
56  
57  
58  
59  
60

1  
2  
3  
4  
5  
6  
7  
8  
9  
10  
11  
12  
13  
14  
15  
16  
17  
18  
19  
20  
21  
22  
23  
24  
25  
26  
27  
28  
29  
30  
31  
32  
33  
34  
35  
36  
37  
38  
39  
40  
41  
42  
43  
44  
45  
46  
47  
48  
49  
50  
51  
52  
53  
54  
55  
56  
57  
58  
59  
60

13. Belfort Jr, R e Moraes, M – Oncocercose ocular no Brasil. AMB Rev Assoc Med Bras. 1979 Apr;25(4):123-7.

For peer review only



1  
2  
3  
4  
5  
6  
7  
8  
9  
10  
11  
12  
13  
14  
15  
16  
17  
18  
19  
20  
21  
22  
23  
24  
25  
26  
27  
28  
29  
30  
31  
32  
33  
34  
35  
36  
37  
38  
39  
40  
41  
42  
43  
44  
45  
46  
47  
48  
49  
50  
51  
52  
53  
54  
55  
56  
57  
58  
59  
60

### 5) **Figure Legends:**

Picture 1: Clinical features. (Left and bottom) Central irregular “mottled” surrounded by a opaque halo opacitie; (Right) Four typical keratitis lesions. All of them had normal translucent area between the lesions and the limbus, without the presence of corneal neovascularization.

Picture 2. Five different patterns of circular lesions measuring about 80  $\mu\text{m}$  in diameter, located sub-epithelial, in different patients. The figures are 400  $\mu\text{m}$  x 400  $\mu\text{m}$ .

Picture 3. Filiform lesions located above the epithelium basal layer about 300  $\mu\text{m}$  long and 10  $\mu\text{m}$  wide, with one dichotomized end into a "C" shape and the other tapered, all in the same patient, who had limbal conjunctiva thick blood smear positive for *Mansonella ozzardi*. The figures are 400  $\mu\text{m}$  x 400  $\mu\text{m}$ .

Picture 4. Microfilaria as detected by thick blood smear and corneal confocal image from a patient who had both tests performed.

1  
2  
3 **PICTURES:**  
4  
5  
6

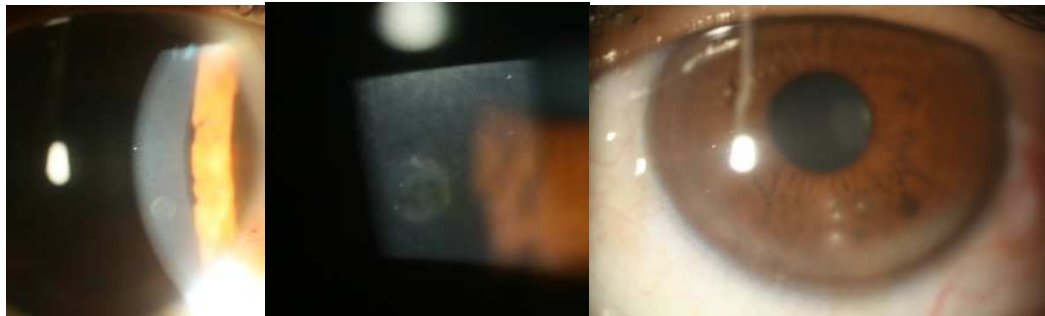

17  
18  
19 Picture 1: Clinical features. (Left and bottom) Central irregular “mottled” surrounded by a  
20 opaque halo opacitie; (Right) Four typical keratitis lesions. All of them had normal  
21 translucent area between the lesions and the limbus, without the presence of corneal  
22 neovascularization.  
23  
24  
25  
26

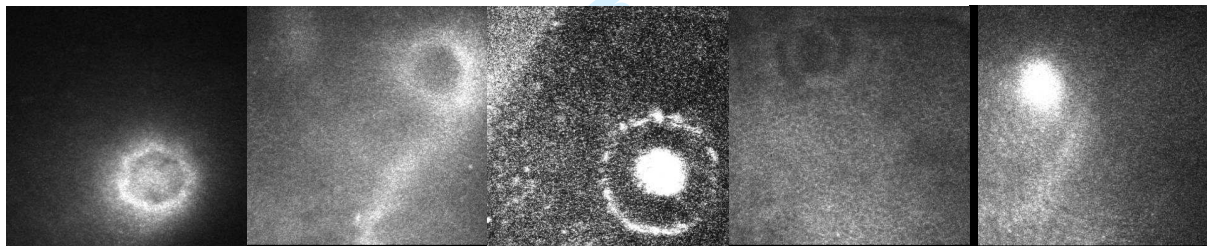

37  
38  
39 Picture 2. Five different patterns of circular lesions measuring about 80 μm in diameter,  
40 located sub-epithelial, in different patients. The figures are 400 μm x 400 μm.  
41  
42  
43  
44  
45  
46  
47  
48  
49  
50  
51  
52  
53  
54  
55  
56  
57  
58  
59  
60

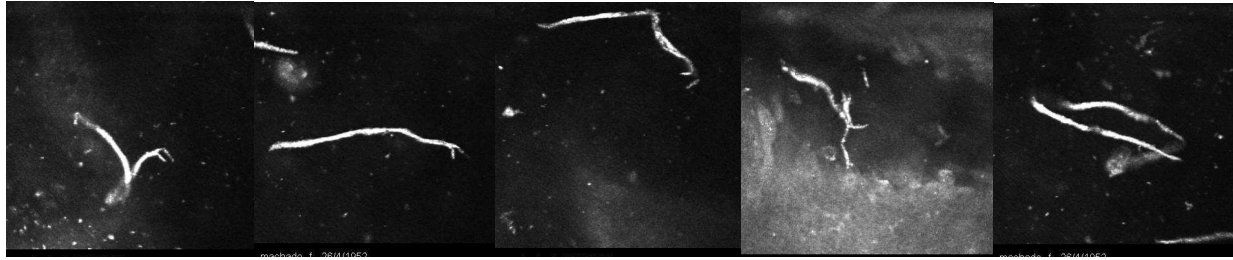

Picture 3. Filiform lesions located above the epithelium basal layer about 300  $\mu\text{m}$  long and 10  $\mu\text{m}$  wide, with one dichotomized end into a "C" shape and the other tapered, all in the same patient, who had limbal conjunctiva thick blood smear positive for *Mansonella ozzardi*. The figures are 400  $\mu\text{m}$  x 400  $\mu\text{m}$ .

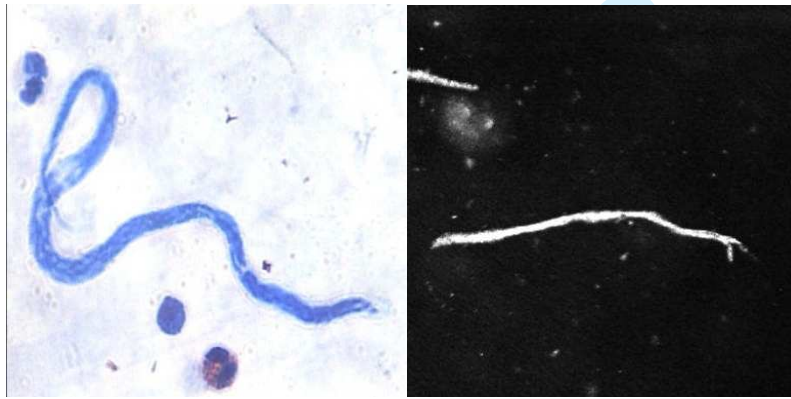

Picture 4. Microfilaria as detected by thick blood smear and corneal confocal image from a patient who had both tests performed.

1  
2  
3  
4  
5  
6  
7  
8  
9  
10  
11  
12  
13  
14  
15  
16  
17  
18  
19  
20  
21  
22  
23  
24  
25  
26  
27  
28  
29  
30  
31  
32  
33  
34  
35  
36  
37  
38  
39  
40  
41  
42  
43  
44  
45  
46  
47  
48  
49  
50  
51  
52  
53  
54  
55  
56  
57  
58  
59  
60

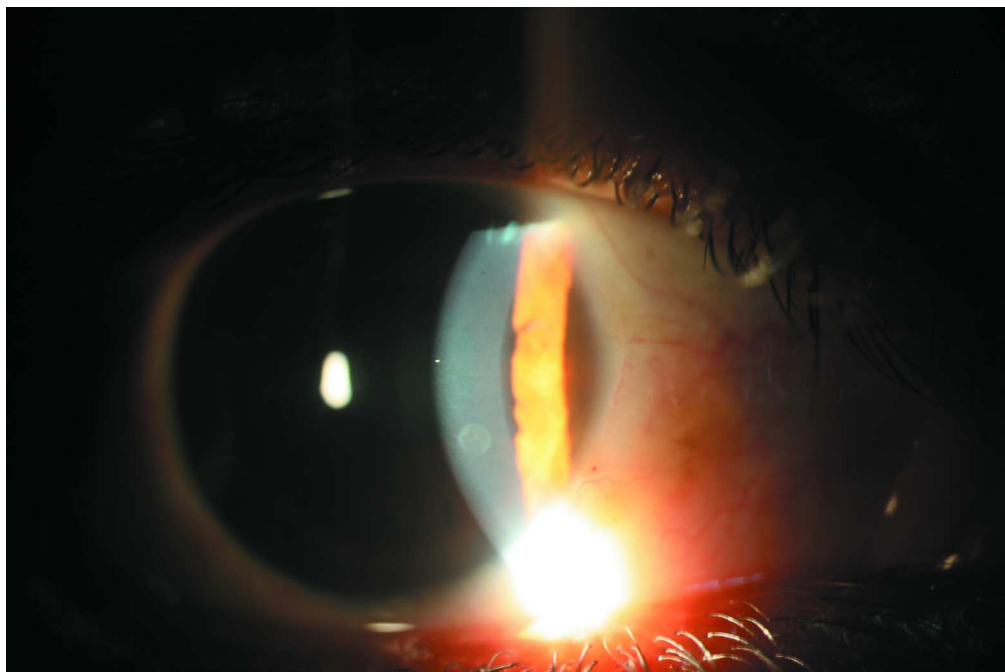

199x133mm (300 x 300 DPI)

Review only

1  
2  
3  
4  
5  
6  
7  
8  
9  
10  
11  
12  
13  
14  
15  
16  
17  
18  
19  
20  
21  
22  
23  
24  
25  
26  
27  
28  
29  
30  
31  
32  
33  
34  
35  
36  
37  
38  
39  
40  
41  
42  
43  
44  
45  
46  
47  
48  
49  
50  
51  
52  
53  
54  
55  
56  
57  
58  
59  
60

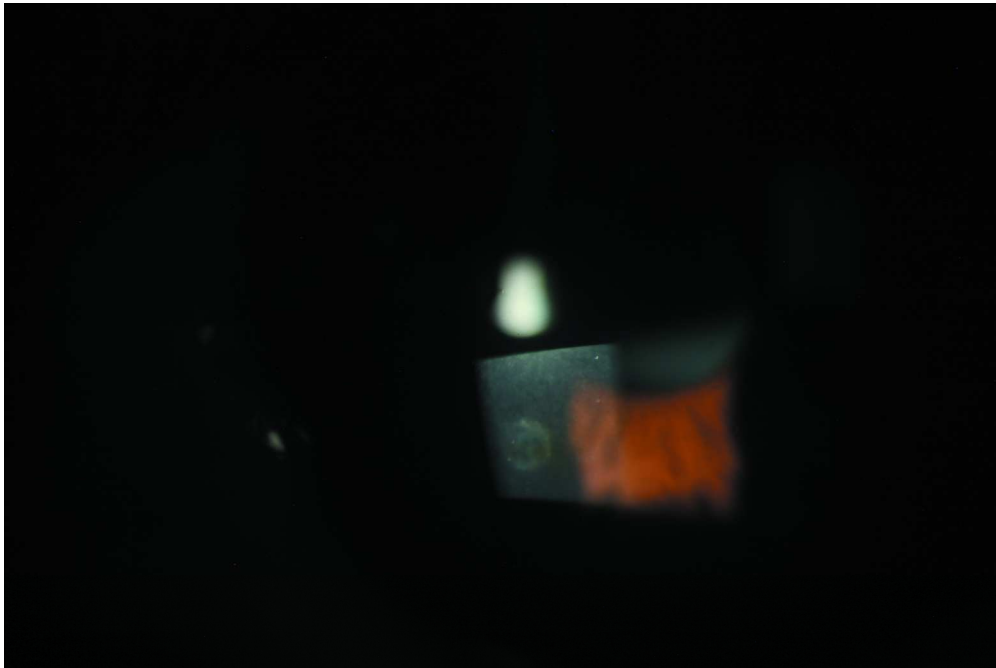

199x133mm (300 x 300 DPI)

Review only

1  
2  
3  
4  
5  
6  
7  
8  
9  
10  
11  
12  
13  
14  
15  
16  
17  
18  
19  
20  
21  
22  
23  
24  
25  
26  
27  
28  
29  
30  
31  
32  
33  
34  
35  
36  
37  
38  
39  
40  
41  
42  
43  
44  
45  
46  
47  
48  
49  
50  
51  
52  
53  
54  
55  
56  
57  
58  
59  
60

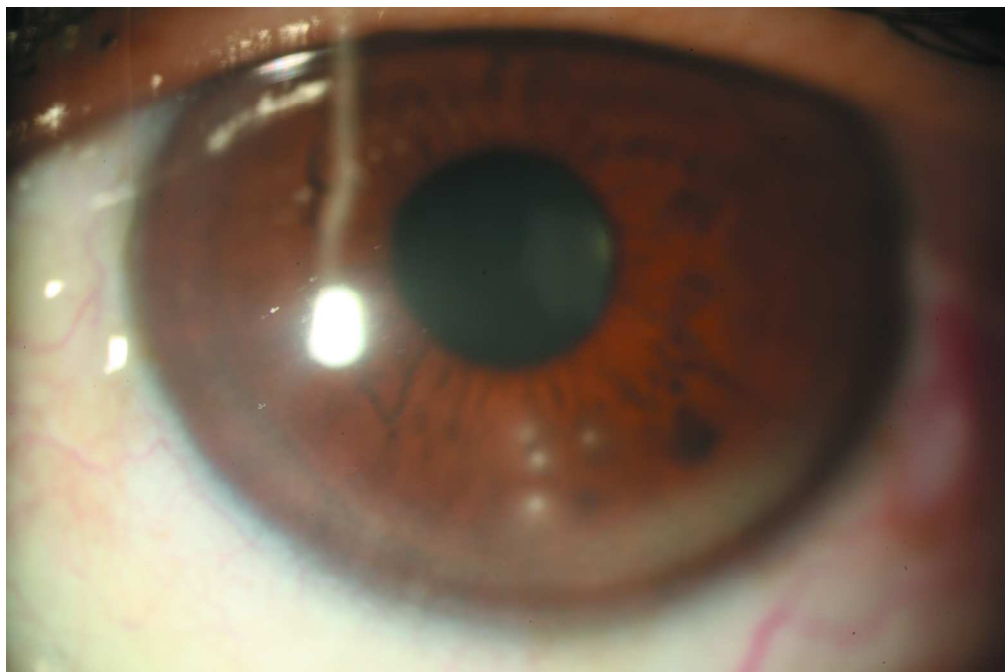

199x133mm (300 x 300 DPI)

Review only

1  
2  
3  
4  
5  
6  
7  
8  
9  
10  
11  
12  
13  
14  
15  
16  
17  
18  
19  
20  
21  
22  
23  
24  
25  
26  
27  
28  
29  
30  
31  
32  
33  
34  
35  
36  
37  
38  
39  
40  
41  
42  
43  
44  
45  
46  
47  
48  
49  
50  
51  
52  
53  
54  
55  
56  
57  
58  
59  
60

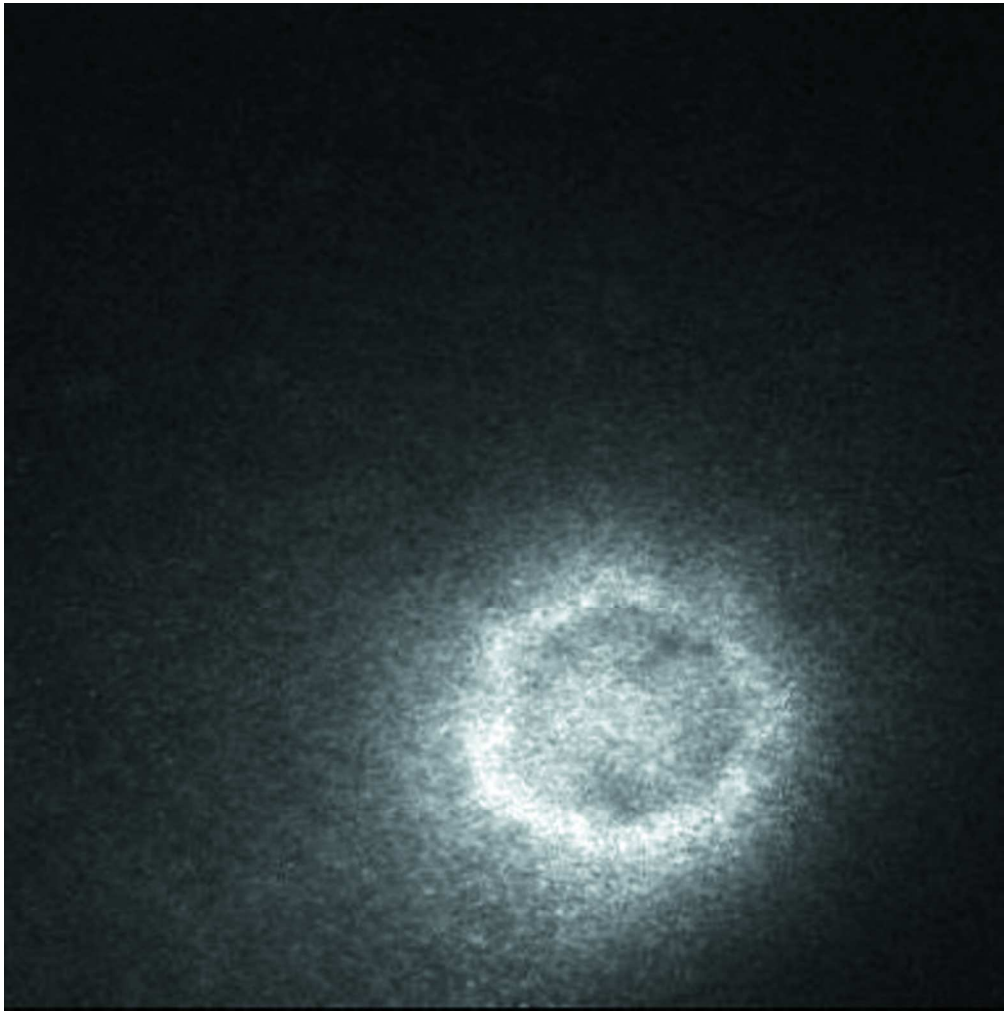

129x130mm (300 x 300 DPI)

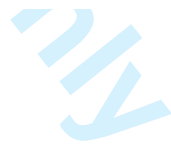

1  
2  
3  
4  
5  
6  
7  
8  
9  
10  
11  
12  
13  
14  
15  
16  
17  
18  
19  
20  
21  
22  
23  
24  
25  
26  
27  
28  
29  
30  
31  
32  
33  
34  
35  
36  
37  
38  
39  
40  
41  
42  
43  
44  
45  
46  
47  
48  
49  
50  
51  
52  
53  
54  
55  
56  
57  
58  
59  
60

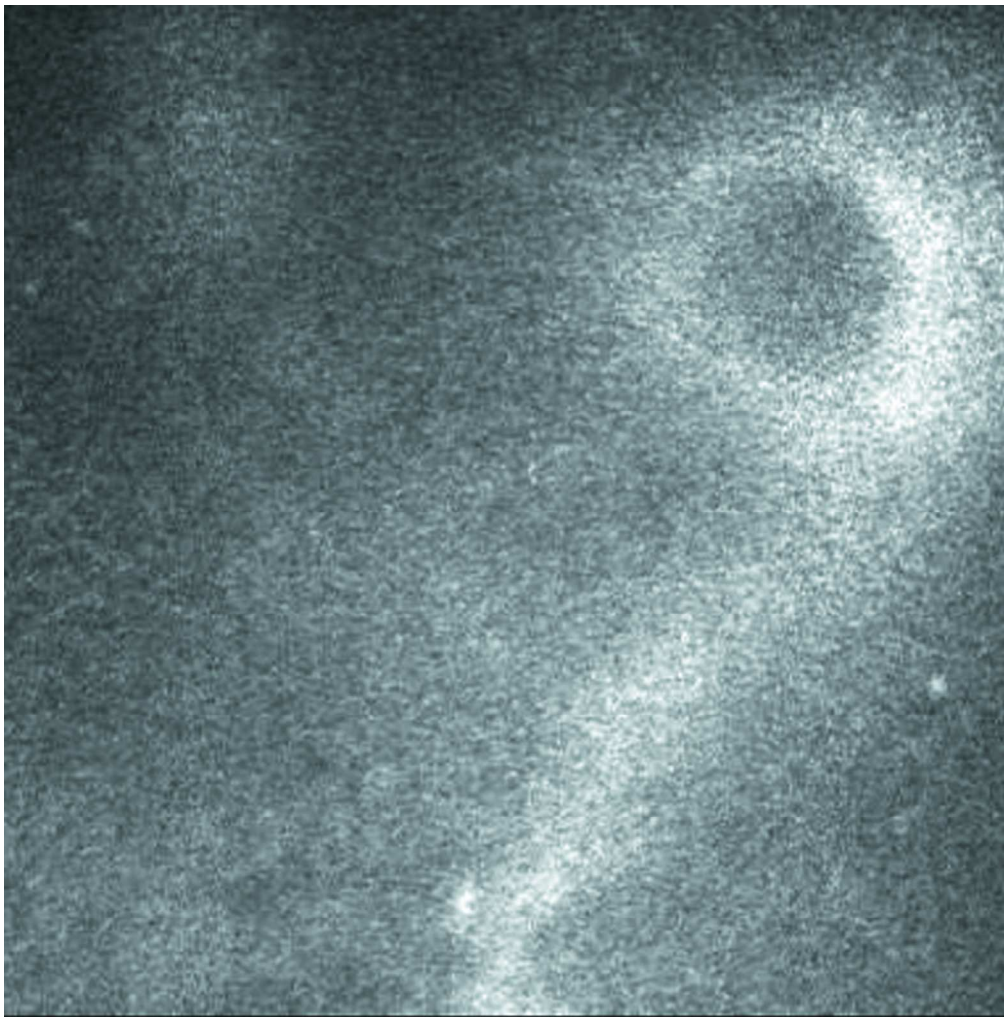

134x135mm (300 x 300 DPI)

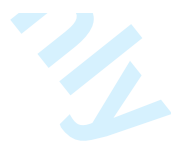



1  
2  
3  
4  
5  
6  
7  
8  
9  
10  
11  
12  
13  
14  
15  
16  
17  
18  
19  
20  
21  
22  
23  
24  
25  
26  
27  
28  
29  
30  
31  
32  
33  
34  
35  
36  
37  
38  
39  
40  
41  
42  
43  
44  
45  
46  
47  
48  
49  
50  
51  
52  
53  
54  
55  
56  
57  
58  
59  
60

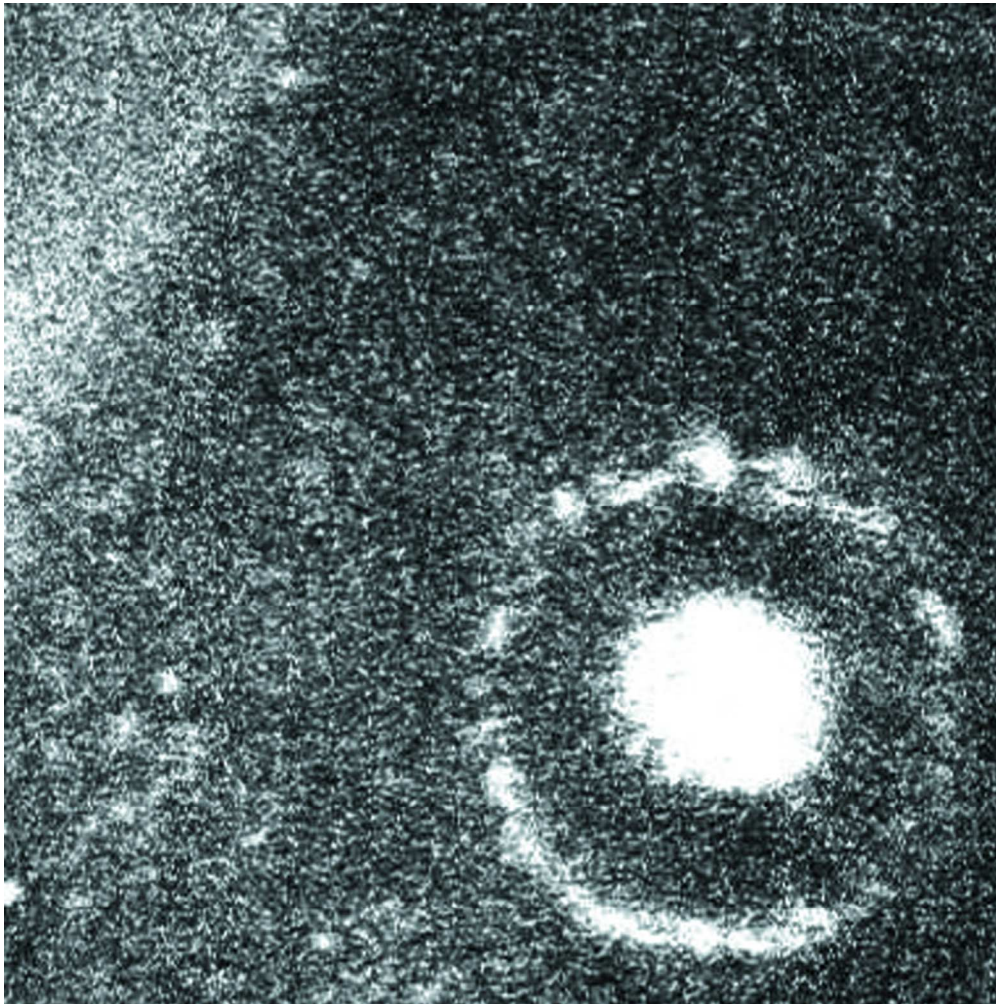

134x135mm (300 x 300 DPI)

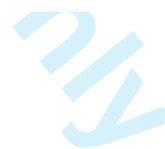

1  
2  
3  
4  
5  
6  
7  
8  
9  
10  
11  
12  
13  
14  
15  
16  
17  
18  
19  
20  
21  
22  
23  
24  
25  
26  
27  
28  
29  
30  
31  
32  
33  
34  
35  
36  
37  
38  
39  
40  
41  
42  
43  
44  
45  
46  
47  
48  
49  
50  
51  
52  
53  
54  
55  
56  
57  
58  
59  
60

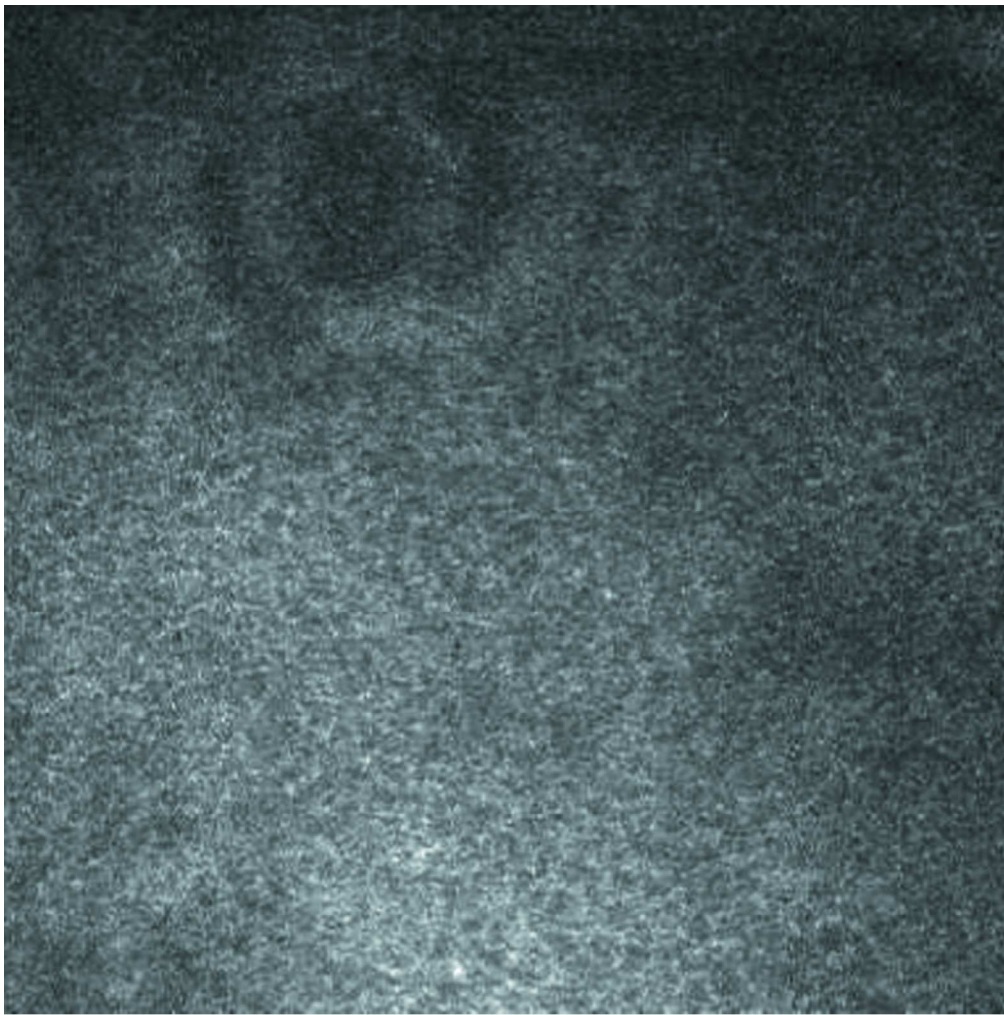

134x135mm (300 x 300 DPI)

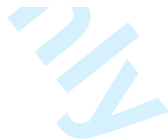

1  
2  
3  
4  
5  
6  
7  
8  
9  
10  
11  
12  
13  
14  
15  
16  
17  
18  
19  
20  
21  
22  
23  
24  
25  
26  
27  
28  
29  
30  
31  
32  
33  
34  
35  
36  
37  
38  
39  
40  
41  
42  
43  
44  
45  
46  
47  
48  
49  
50  
51  
52  
53  
54  
55  
56  
57  
58  
59  
60

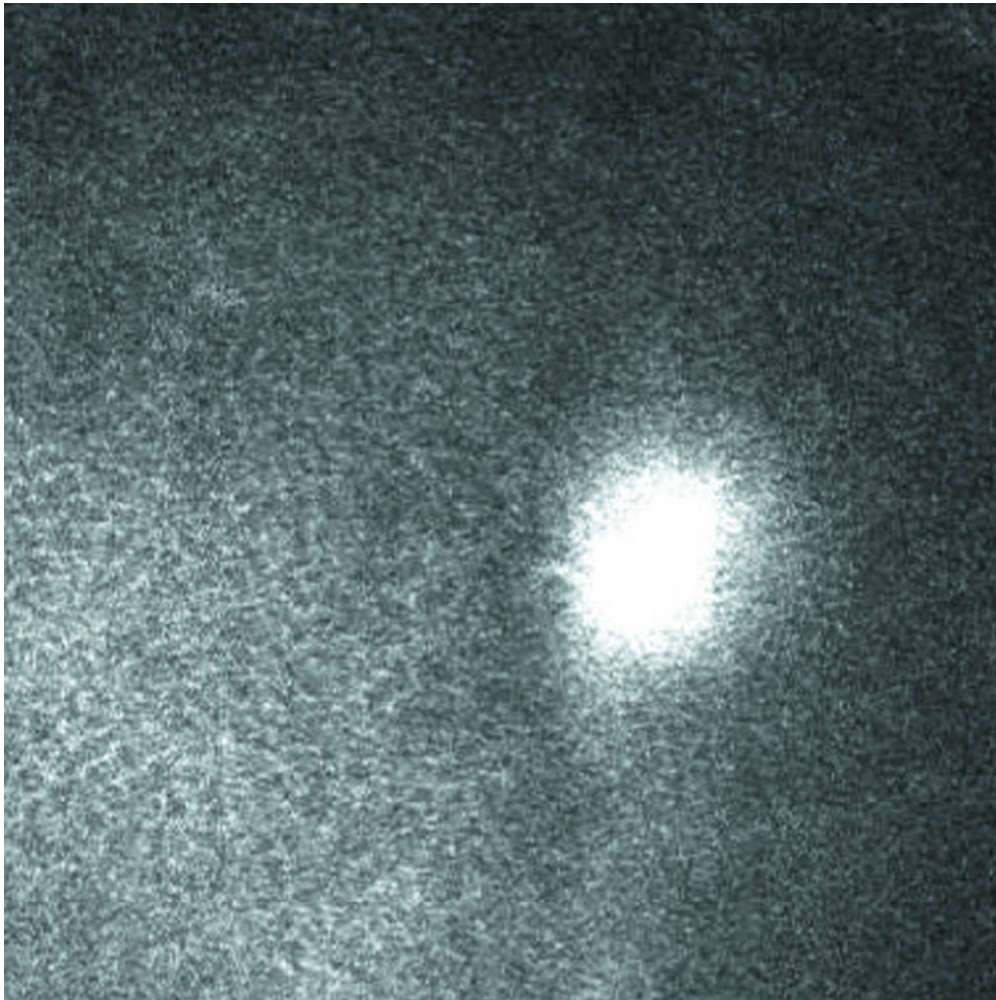

134x133mm (300 x 300 DPI)

BMJ

1  
2  
3  
4  
5  
6  
7  
8  
9  
10  
11  
12  
13  
14  
15  
16  
17  
18  
19  
20  
21  
22  
23  
24  
25  
26  
27  
28  
29  
30  
31  
32  
33  
34  
35  
36  
37  
38  
39  
40  
41  
42  
43  
44  
45  
46  
47  
48  
49  
50  
51  
52  
53  
54  
55  
56  
57  
58  
59  
60

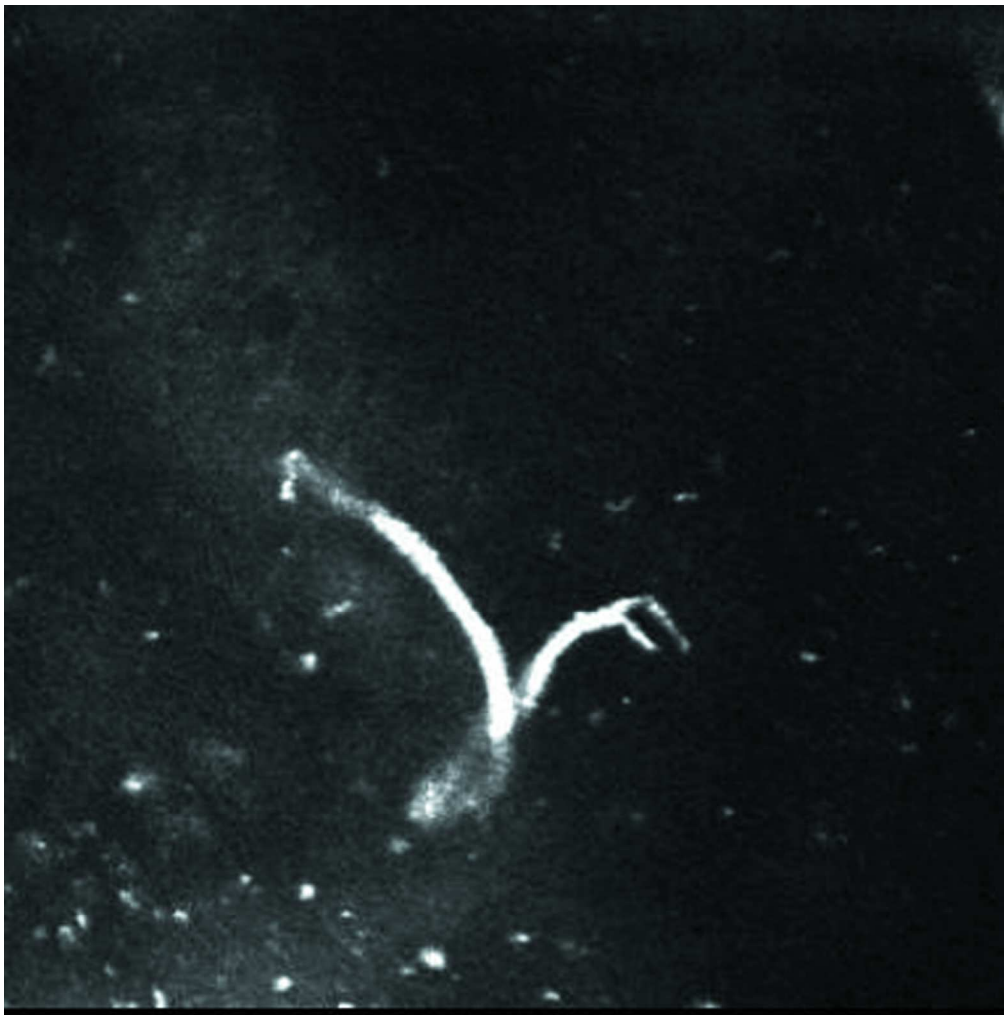

134x135mm (300 x 300 DPI)

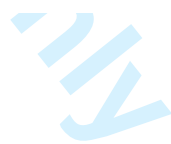

1  
2  
3  
4  
5  
6  
7  
8  
9  
10  
11  
12  
13  
14  
15  
16  
17  
18  
19  
20  
21  
22  
23  
24  
25  
26  
27  
28  
29  
30  
31  
32  
33  
34  
35  
36  
37  
38  
39  
40  
41  
42  
43  
44  
45  
46  
47  
48  
49  
50  
51  
52  
53  
54  
55  
56  
57  
58  
59  
60

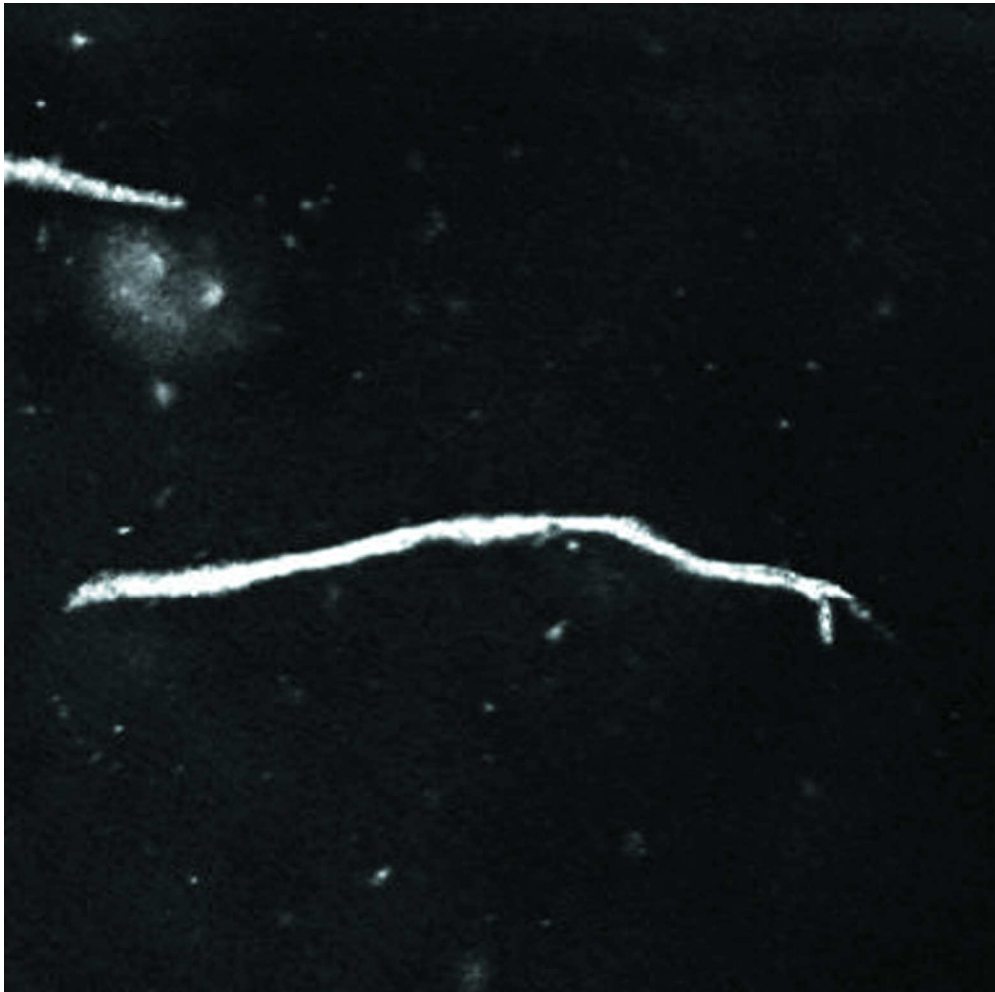

135x134mm (300 x 300 DPI)

only

1  
2  
3  
4  
5  
6  
7  
8  
9  
10  
11  
12  
13  
14  
15  
16  
17  
18  
19  
20  
21  
22  
23  
24  
25  
26  
27  
28  
29  
30  
31  
32  
33  
34  
35  
36  
37  
38  
39  
40  
41  
42  
43  
44  
45  
46  
47  
48  
49  
50  
51  
52  
53  
54  
55  
56  
57  
58  
59  
60

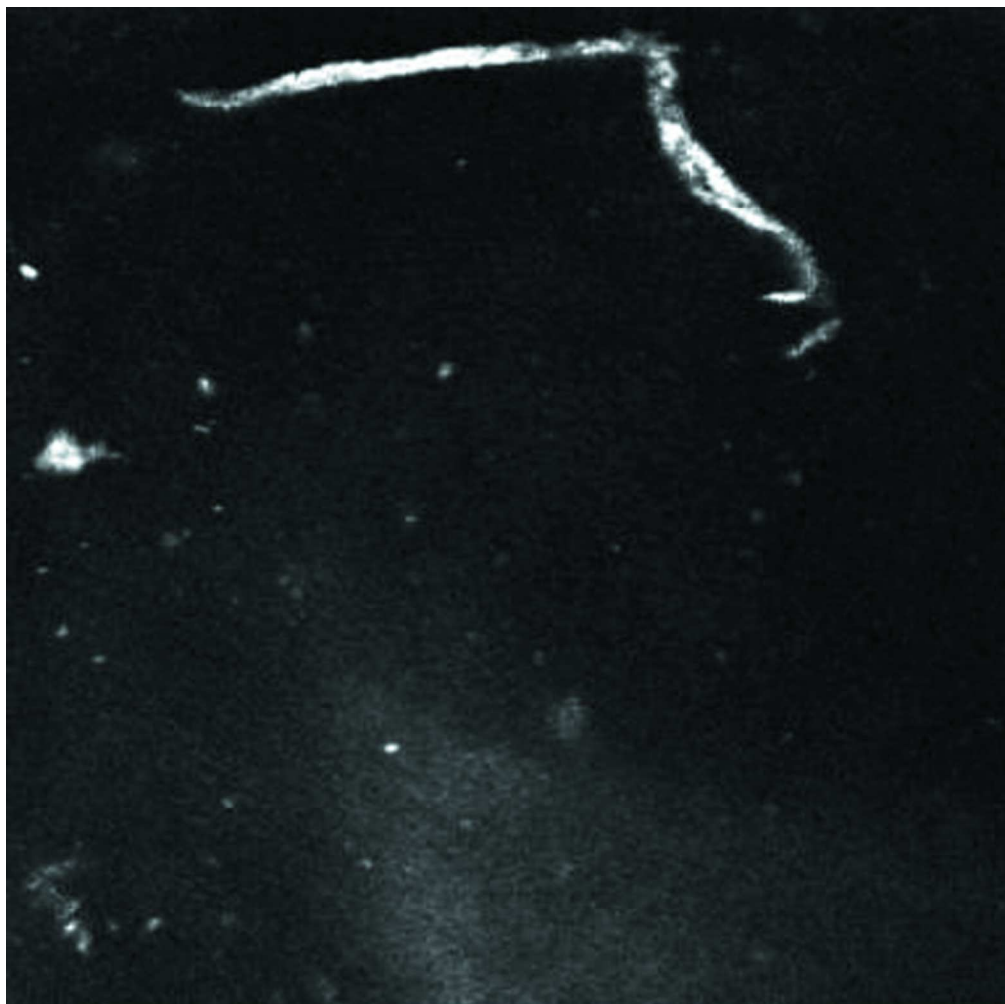

134x134mm (300 x 300 DPI)

BMJ

1  
2  
3  
4  
5  
6  
7  
8  
9  
10  
11  
12  
13  
14  
15  
16  
17  
18  
19  
20  
21  
22  
23  
24  
25  
26  
27  
28  
29  
30  
31  
32  
33  
34  
35  
36  
37  
38  
39  
40  
41  
42  
43  
44  
45  
46  
47  
48  
49  
50  
51  
52  
53  
54  
55  
56  
57  
58  
59  
60

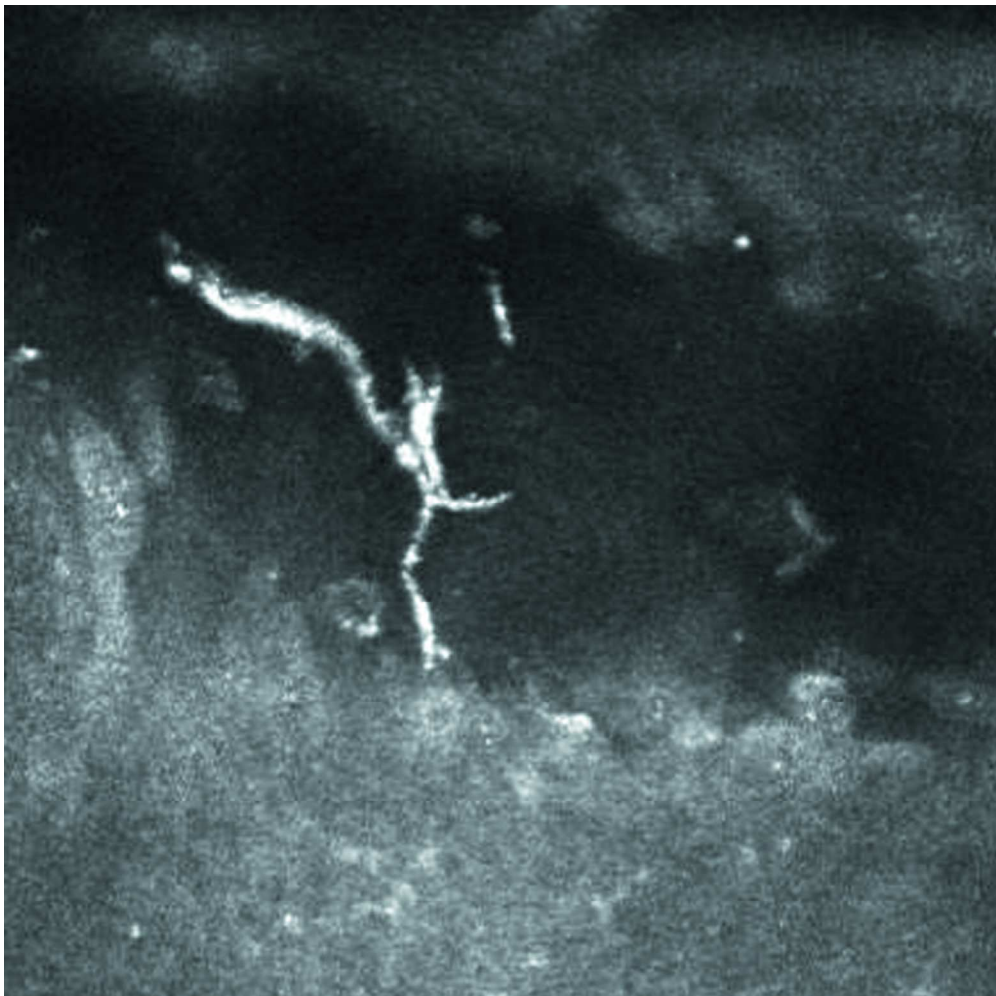

134x134mm (300 x 300 DPI)

BMJ

1  
2  
3  
4  
5  
6  
7  
8  
9  
10  
11  
12  
13  
14  
15  
16  
17  
18  
19  
20  
21  
22  
23  
24  
25  
26  
27  
28  
29  
30  
31  
32  
33  
34  
35  
36  
37  
38  
39  
40  
41  
42  
43  
44  
45  
46  
47  
48  
49  
50  
51  
52  
53  
54  
55  
56  
57  
58  
59  
60

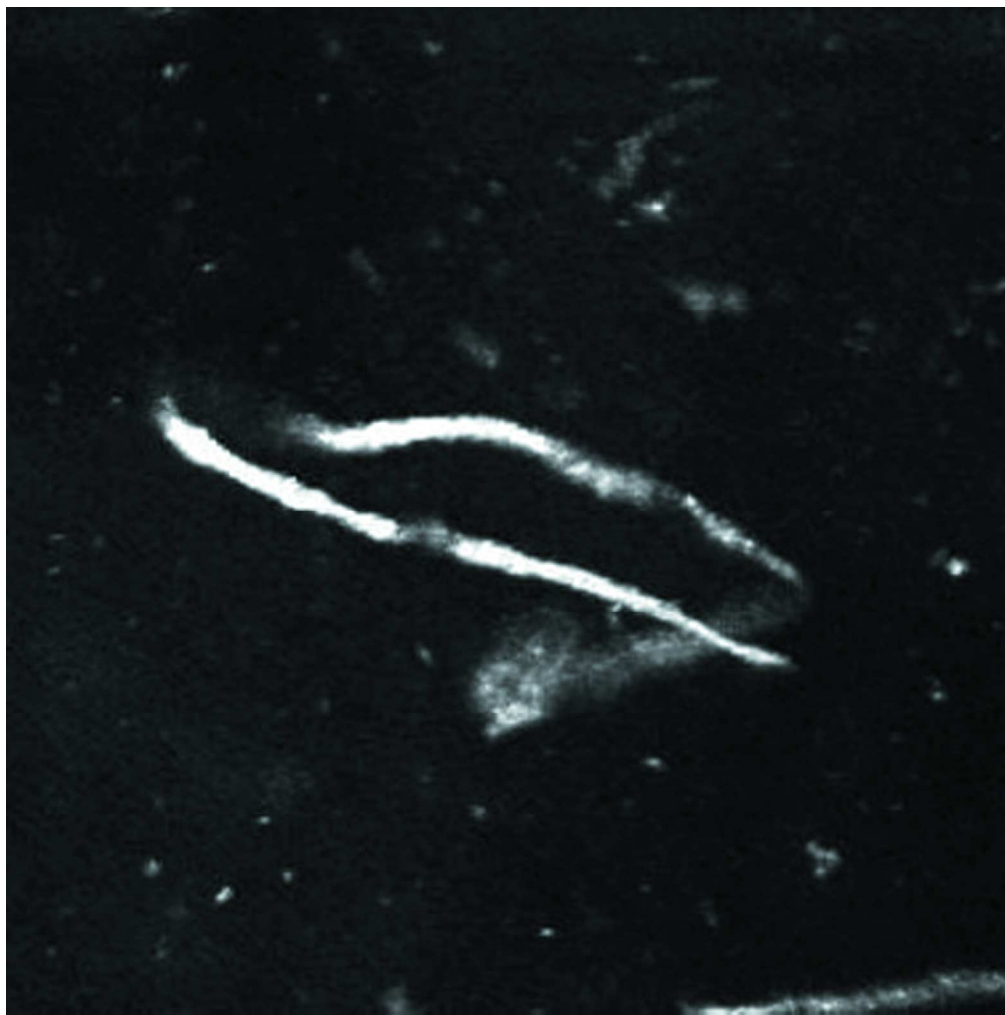

132x133mm (300 x 300 DPI)

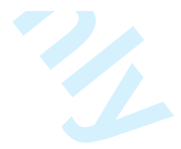



1  
2  
3  
4  
5  
6  
7  
8  
9  
10  
11  
12  
13  
14  
15  
16  
17  
18  
19  
20  
21  
22  
23  
24  
25  
26  
27  
28  
29  
30  
31  
32  
33  
34  
35  
36  
37  
38  
39  
40  
41  
42  
43  
44  
45  
46  
47  
48  
49  
50  
51  
52  
53  
54  
55  
56  
57  
58  
59  
60

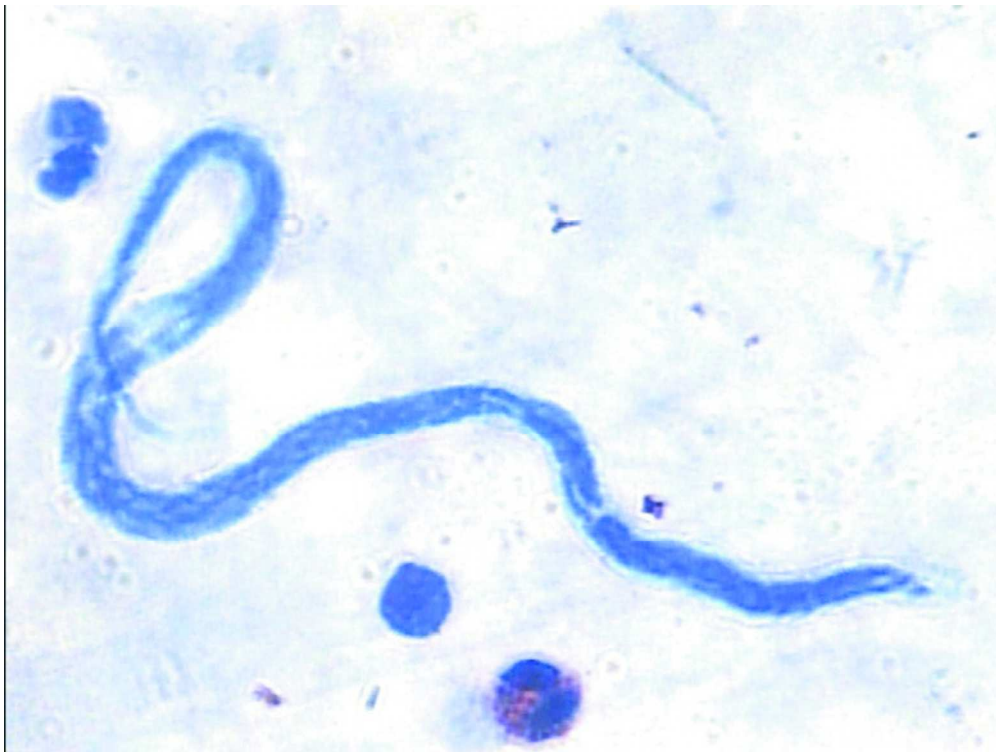

150x112mm (300 x 300 DPI)

ew only

1  
2  
3  
4  
5  
6  
7  
8  
9  
10  
11  
12  
13  
14  
15  
16  
17  
18  
19  
20  
21  
22  
23  
24  
25  
26  
27  
28  
29  
30  
31  
32  
33  
34  
35  
36  
37  
38  
39  
40  
41  
42  
43  
44  
45  
46  
47  
48  
49  
50  
51  
52  
53  
54  
55  
56  
57  
58  
59  
60

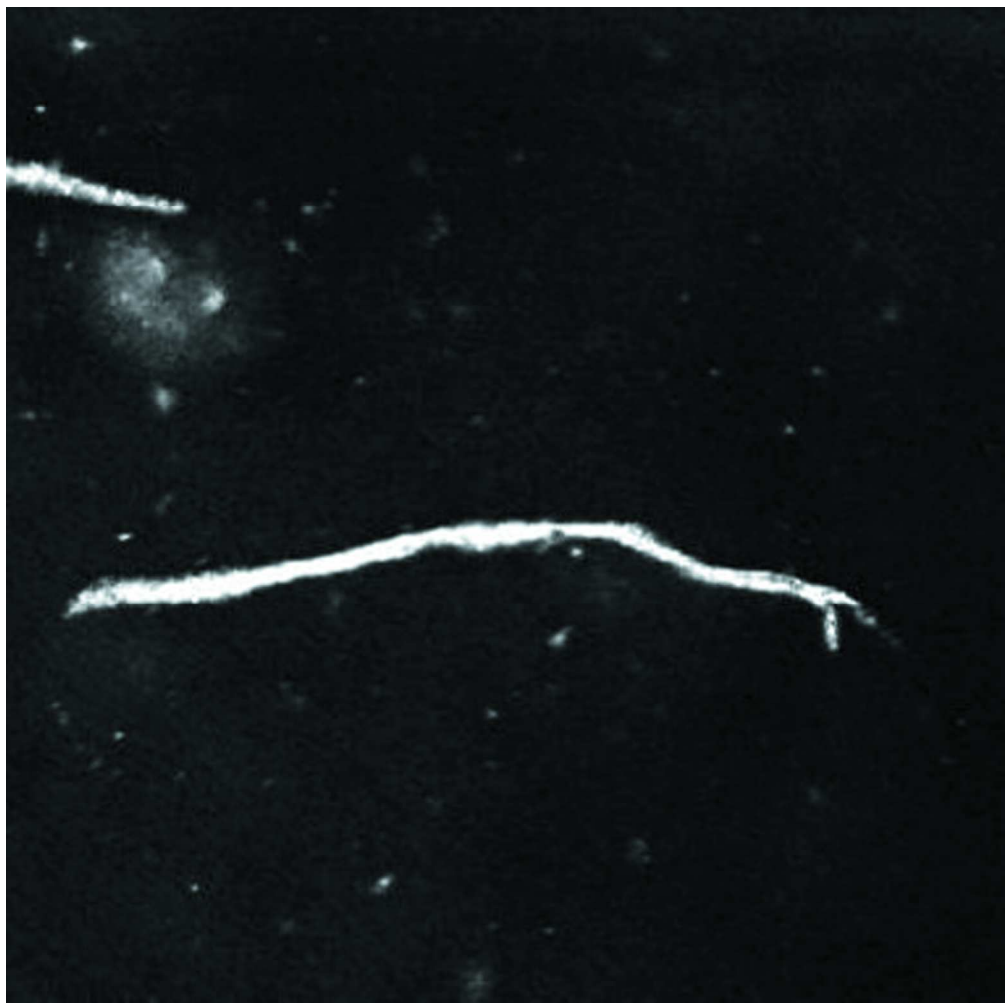

134x134mm (300 x 300 DPI)

univ

1  
2  
3 **Competing Interests and Contributorship Statements:**  
4  
5  
6  
7

8  
9 **Article: *Mansonella ozzardi* corneal lesions in the Amazon**  
10

11  
12 **Authors:** Lucas Monferrari Monteiro Vianna, Marilaine Martins, Marcos Jacob Cohen,  
13  
14 Jacob Cohen, Rubens Belfort Jr  
15  
16

17  
18  
19  
20 **Statetment:**  
21

22 We state that none of us have competing interests.  
23

24 We also state that all of us contributed in the conception and design of the study,  
25 acquisition, analysis and interpretation of data, drafting and revising of the article and  
26  
27 the final approval of the version to be published.  
28  
29  
30  
31  
32  
33  
34  
35  
36  
37  
38  
39  
40  
41  
42  
43  
44  
45  
46  
47  
48  
49  
50  
51  
52  
53  
54  
55  
56  
57  
58  
59  
60



**Mansonella ozzardi corneal lesions in the Amazon: a cross-sectional study**

|                                 |                                                                                                                                                                                                                                                                                                                                                                                                               |
|---------------------------------|---------------------------------------------------------------------------------------------------------------------------------------------------------------------------------------------------------------------------------------------------------------------------------------------------------------------------------------------------------------------------------------------------------------|
| Journal:                        | <i>BMJ Open</i>                                                                                                                                                                                                                                                                                                                                                                                               |
| Manuscript ID:                  | bmjopen-2012-001266.R1                                                                                                                                                                                                                                                                                                                                                                                        |
| Article Type:                   | Research                                                                                                                                                                                                                                                                                                                                                                                                      |
| Date Submitted by the Author:   | 23-Sep-2012                                                                                                                                                                                                                                                                                                                                                                                                   |
| Complete List of Authors:       | Vianna, Lucas; UNIFESP, Ophthalmology<br>Martins, Marilaine; Fundação de Medicina Tropical do Amazonas, State University Amazonas, Parasithology<br>Cohen, Jacob; Federal University of Amazonas / Instituto de Oftalmologia de Manaus, Ophthalmology<br>Cohen, Marcos; Federal University of Amazonas / Instituto de Oftalmologia de Manaus, Ophthalmology<br>Belfort Junior, Rubens; UNIFESP, Ophthalmology |
| <b>Primary Subject Heading</b>: | Addiction                                                                                                                                                                                                                                                                                                                                                                                                     |
| Secondary Subject Heading:      | Ophthalmology                                                                                                                                                                                                                                                                                                                                                                                                 |
| Keywords:                       | OPHTHALMOLOGY, Corneal and external diseases < OPHTHALMOLOGY, PARASITOLOGY                                                                                                                                                                                                                                                                                                                                    |
|                                 |                                                                                                                                                                                                                                                                                                                                                                                                               |

SCHOLARONE™  
Manuscripts

1  
2  
3  
4  
5  
6  
7  
8  
9  
10  
11  
12  
13  
14  
15  
16  
17  
18  
19  
20  
21  
22  
23  
24  
25  
26  
27  
28  
29  
30  
31  
32  
33  
34  
35  
36  
37  
38  
39  
40  
41  
42  
43  
44  
45  
46  
47  
48  
49  
50  
51  
52  
53  
54  
55  
56  
57  
58  
59  
60

1) **Title Page:**

**Mansonella ozzardi corneal lesions in the Amazon**

**Authors:** Lucas Monferrari Monteiro Vianna (first author)\*; Marilaine Martins\*\*; Marcos Jacob Cohen\*\*\*, Jacob Cohen\*\*\*, Rubens Belfort Jr\*

\*Vision Institute and Department of Ophthalmology. Hospital São Paulo - Federal University of São Paulo. Address: Botucatu St, 821 – ZIP: 04023-900 – São Paulo/SP - Brazil

\*\* Fundação de Medicina Tropical do Amazonas, Universidade do Estado do Amazonas. Address: Pedro Teixeira Av., 25 - ZIP: 69040-000 - Manaus/AM - Brazil

\*\*\* Universidade Federal do Amazonas (UFAM) / Instituto de Oftalmologia de Manaus (IOM). Address: General Rodrigo Octávio Jordão Ramos Av, 3000, Campus Universitário, Coroado I - 69077-000 - Manaus/AM – Brazil

**Keywords:** Mansonella, microfilaria, keratitis, microscopy, confocal, biopsy



Lucas Monferrari Monteiro Vianna, MD (Corresponding Author)

Department of Ophthalmology / Federal University of Sao Paulo, Sao Paulo, Brazil

Phone: 55-11-7493-8000 - Fax: 55-11-5085-2010 ([lucasmvvianna@yahoo.com.br](mailto:lucasmvvianna@yahoo.com.br))

## **Mansonella ozzardi corneal lesions in the Amazon**

### **Abstract:**

**Purpose:** To characterize and confirm the presence of *Mansonella ozzardi* microfilariae in the cornea by biomicroscopy and corneal confocal microscopy.

**Methods:** Cross-sectional, clinical practice study of 212 consecutive volunteers patients from communities of the rural area of Coari City in the Solimões River, Amazonas State, Brazil. All patients had the eyes examined using a flash light and had blood checked for the presence of microfilariae by expert microscopist. Patients with suspicious corneal lesions (characterized as nummular keratitis) at the eye exam were submitted to biomicroscopy, funduscopy and corneal confocal microscopy (CCME) evaluation. Two patients underwent biopsy of the limbal conjunctiva adjacent to the nummular keratitis area and blood was collected from the surgical wound for microfilariae investigation by thick blood examination.

**Results:** Of the 212 patients, 56 (26,4%) were positive for microfilaremia. By flash light examination, 22 patients that had nummular keratitis were sent to biomicroscopy and CCME. At biomicroscopy, lesions were divided in quiescent and active. At CCME, they were divided in circular and filiform lesions. The associations between lesions and microfilaremia are shown.

**Conclusions:** We presented some evidences of the presence of *M. ozzardi* microfilariae in the cornea and its pathogenicity to the eye. Further studies using ocular tissue PCR and other image techniques can be helpful.

## 2) Main Text:

### Introduction

Hundreds of types of filariae have been described and a few can cause infections in humans, *Mansonella ozzardi* being one of them and the first description of *M. ozzardi* associated with corneal disease was published in 1998.<sup>1</sup>

*M. ozzardi* is a filaria exclusively found in America and one of the causes of mansonelliasis.<sup>2</sup> In Brazil it is found in the states of Roraima, Mato Grosso and Amazonas.<sup>3,4,5</sup> The microfilariae of *M. ozzardi* are found in peripheral blood and can be identified by their morphological characteristics or by molecular biology.<sup>6,7</sup>

The clinical features of mansonelliasis are not well described. Infected individuals are generally asymptomatic or have signs and symptoms common to other infections such as fever, coldness in the legs, joint pain and headache.<sup>8</sup> They may also include skin and ocular lesions<sup>1,9,10</sup> and be associated with *Wolbachiae*, that are bacterial endosymbionts of insects and many filarial nematodes and their products trigger inflammatory responses<sup>10</sup>.

Coari City, at Solimões River (04°08'S63°07'W) has a high prevalence of *M. ozzardi* infection. Studies showed average infection rate between 13.3% and 18.9%, with higher prevalence in rural areas and patient aging.<sup>2, 10</sup> Onchocerciasis does not exist in this region of the Amazon.<sup>12</sup>

## Materials and Methods

Cross-sectional, clinical practice study of 212 consecutive volunteers patients from communities of the rural area of Coari City in the Solimões River, Amazonas State, Brazil. All patients had their eyes examined using a flash light and had blood checked for the presence of microfilariae by expert microscopist. The peripheral blood infection by *M. ozzardi* was determined by light-microscopy examination (200x and 400x) of Giemsa-stained thick smears of peripheral blood obtained by digital puncture with a sterile disposable lancet<sup>6</sup>, Knott and polycarbonate membrane filtration and by a new identification protocol using the polymerase chain reaction (PCR) (M Martins et al., unpublished observations). Patients with nummular keratitis, similar to those previously described in the literature<sup>1,9,10</sup>, at the eye examination were subjected to biomicroscopy, fundoscopy and corneal confocal microscopy evaluation (CCME), using the Rostock Cornea Module (RCM) of the Heidelberg Retina Tomograph. Photographs were taken at the slit lamp. The CCME was performed in the central cornea and in the corneal regions with the nummular keratitis. Two patients underwent biopsy of the limbal conjunctiva adjacent to the nummular keratitis area and blood was collected from the surgical wound for microfilariae investigation by thick blood examination.

The study was prospective and approved by the UNIFESP Ethical Committee. All participants signed the protocol's informed consent.

Data were presented in contingency tables and Fisher exact test was used to compare proportions. P-values less than 0.05 were considered statistically significant. Analyses were done in Stata v.11 (College Station, Texas).



1  
2  
3 We have no competing interests.  
4  
5  
6  
7

## 8 Results 9

10 Of the 212 patients, 56 (26,4%) were positive for microfilaremia. By flash light  
11 examination, 22 patients that had nummular keratitis were sent to biomicroscopy and  
12 CCME. Four of them had bilateral lesions. The association between microfilaremia and  
13 cornea lesions is shown in table 1, with statistically significant finding.  
14  
15  
16  
17

18 At biomicroscopy, some lesions were characterized as nummular, mid periphery and  
19 anterior stroma corneal opacities, 0.5 to 1.0 mm in diameter with central mottled  
20 surrounded by a opaque halo, with marked limit between the white opacity and the clear  
21 cornea. Other lesions were characterized by nummular keratitis, also located at mid  
22 periphery and anterior stroma .In all cases there was a normal translucent area between  
23 the corneal lesions and the limbus and absence of corneal neovascularization or other  
24 changes (Picture 1). The clinical characteristics of the lesions as well as the high  
25 prevalence exclude the possibility of traumas and other known causes for  
26 the differential diagnosis, specifically Onchocercosis. The association between  
27 nummular keratitis and microfilaremia is shown in table 2.  
28  
29  
30  
31  
32  
33  
34  
35  
36  
37  
38  
39  
40  
41  
42

43 Among the 22 patients with corneal lesions at biomicroscopy, 12 presented suspected  
44 related lesions also at the CCME. These confocal suspected lesions was presented in  
45 two patterns: circular (increased reflectivity, measuring about 80 micra in diameter,  
46 located at the sub-epithelial level, as shown in picture 2) and linear (filiform lesions  
47 ranging from 250 to 300  $\mu\text{m}$  in length and 10 to 15  $\mu\text{m}$  wide, with one "C" shape end  
48 and the other tapered, as shown in picture 3). Five patients presented only circular  
49  
50  
51  
52  
53  
54  
55  
56  
57  
58  
59  
60

1  
2  
3 lesions, one patient only linear lesions and six patients had both of them. The  
4  
5 association between confocal lesions and microfilaremia is shown in table 3.  
6  
7

8 In two volunteers patients with linear lesions, thick blood smear of the limbal conjunctiva  
9  
10 was performed and confirmed the microfilaremia. Picture 4 compares microfilaria of *M.*  
11  
12 *ozzardi* seen at the thick blood smear with the confocal microscopy image.  
13

14  
15 Acknowledgement for Funding/Support to FAPESP (Fundação de Amparo à Pesquisa  
16  
17 do Estado de São Paulo or Foundation for Research Support of São Paulo State) and  
18  
19 for technical support for *Mansonella*-Brazil Group (Belfort Jr RB, Borborema M, Cohen  
20  
21 J, Cohen MJ, Cunha P, Fontes G, Martins M, Medeiros JF, Pessoa, FAC, Vianna LMM,  
22  
23 Zanelato T).  
24  
25  
26  
27  
28  
29  
30

### 31 Discussion

32  
33

34 The prevalence of *M. ozzardi* is high in some riverside communities in Amazon with the  
35  
36 increasing occupation of rainforest areas.<sup>2,12</sup> Previous studies in Coari city showed an  
37  
38 average infection rate between 13.3% and 18.9%, with higher prevalence in rural areas  
39  
40 and patient aging.<sup>2, 10</sup> In the present study, the prevalence was of 26,4%.  
41  
42

43 Presumed keratitis caused by *M. ozzardi* has been described in Brazil by us as well as  
44  
45 other authors, with no other defined etiology related.<sup>1,9,10</sup> A comparison with other filarial  
46  
47 diseases shows some similarities with onchocerciasis but there is no onchocerciasis  
48  
49 in those parts of Brazil and also the clinical picture is different. Onchocerciasis has been  
50  
51 excluded by the characteristics of the microfilaria tail and because it exists in Brazil only  
52  
53  
54  
55  
56  
57  
58  
59  
60

1  
2  
3 close to the Venezuela border, in the Yanomami Indian Reservation.<sup>13,14</sup> None of the  
4  
5 patients lived or visited areas where *Onchocerca* exist.  
6  
7

8 A study conducted in Pauini, at the Purus River revealed 20 non-Indian habitants with  
9  
10 peripheral corneal opacities among 524 patients examined. No microfilariae were seen  
11  
12 in the skin snips and *Mansonella sp* was found in the blood of the 2 patients where it  
13  
14 was possible to collect blood.<sup>1</sup> Another study, conducted in São Gabriel da Cachoeira  
15  
16 (Negro River) showed a positive association between *M. ozzardi* and corneal lesions  
17  
18 with all patients presenting ocular changes having *M. ozzardi* microfilariae in blood  
19  
20 samples.<sup>9</sup> All the skin biopsies were negative for microfilaria including *Onchocerca*. The  
21  
22 association between the keratitis and positive microfilaremia in the Amazon was also  
23  
24 related by Cohen et al.<sup>10</sup> In our study, this association was also found, with statistically  
25  
26 significant finding, as shown in table 1.  
27  
28  
29  
30

31 The aspect of corneal lesions was divided by its characteristics in only corneal opacities  
32  
33 and keratitis, as shown in picture 1. Among patients positive for microfilaremia, the  
34  
35 proportion of keratitis aspect seems to be higher and among patients negative for  
36  
37 microfilaria, the proportion of only opacity aspect was higher (table 2). One explanation  
38  
39 for the presence of patients with keratitis lesion and negative microfilaremia could be  
40  
41 false negatives in the blood tests. Patients with only opacity lesion and positive  
42  
43 microfilaremia could be explained by chronic infection.  
44  
45  
46  
47

48 Like in previous studies,<sup>1,9,10</sup> we could not detect, by biomicroscopy, filariae in any  
49  
50 ocular tissue, but corneal lesions similar to previous descriptions were found. Using  
51  
52 CCME, we detected not previously described lesions. Among patients positive for  
53  
54 microfilaremia, the proportion of confocal lesions was higher (table 3). The confocal  
55  
56  
57  
58  
59  
60

1  
2  
3 lesions were divided by their aspects in linear and circular. Among patients with lesions  
4 identified by CCME, there was a higher proportion of patients positive for microfilaremia  
5 and a higher proportion of circular aspect alone among patients negative for  
6 microfilaremia (table 3). It could suggest that linear lesions are associated with active  
7 disease and circular lesions with inflammatory scars, associated or not with active  
8 disease. The size of linear lesions (250-300 microns) on CCME was higher than  
9 showed in microbiological studies (149-240 microns)<sup>6</sup>. The microfilariae are probably  
10 dead in ocular tissues and could enlarge due to inflammatory reaction. Circular lesions  
11 could represent, besides inflammatory reaction surrounding dead microfilariae, cross  
12 section of remnants of adult worms (26 to 49 mm in length by 0.07 to 0.15 mm in  
13 diameter)<sup>6</sup>.

14  
15  
16  
17  
18  
19  
20  
21  
22  
23  
24  
25  
26  
27  
28  
29 Unaffected patients were not tested due to difficulties of field work. We performed  
30 confocal microscopy in both eyes of all the 22 patients with keratitis. In the 18 with  
31 unilateral keratitis, the non affected fellow eye never showed alterations in the confocal  
32 microscopy.

### 33 34 35 36 37 38 39 40 41 Conclusion

42  
43 We presented some evidences of the presence of *M. ozzardi* microfilariae in the cornea  
44 and its pathogenicity to the eye. Further studies using ocular tissue PCR and other  
45 image techniques can be helpful.  
46  
47  
48  
49  
50  
51  
52  
53  
54  
55  
56  
57  
58  
59  
60

#### 4) Tables:

Table 1. Association between microfilaremia and corneal lesions.

| Corneal Lesions (horizontal)     | Presence<br>(+) | Absence<br>(-) | Total      |
|----------------------------------|-----------------|----------------|------------|
| <b>Microfilaremia (vertical)</b> |                 |                |            |
| <b>Positive (+)</b>              | 14 (63,6%)      | 42 (22%)       | 56         |
| <b>Negative (-)</b>              | 8 (33,4%)       | 148 (88%)      | 156        |
| <b>Total</b>                     | 22              | 190            | 212 (100%) |

p-value: 0.0001

Table 2. Association between nummular keratitis and microfilaremia.

| Keratitis lesions (horizontal)   | Presence<br>(+) | Absence<br>(-) | Total     |
|----------------------------------|-----------------|----------------|-----------|
| <b>Microfilaremia (vertical)</b> |                 |                |           |
| <b>Positive (+)</b>              | 10 (76,9%)      | 4 (44%)        | 14        |
| <b>Negative (-)</b>              | 3 (23,1%)       | 5 (56%)        | 8         |
| <b>Total</b>                     | 13              | 9              | 22 (100%) |

p-value: 0.1347

Table 3. Association between confocal lesions and microfilaremia.

| Confocal lesion (horizontal)     | Presence (+)                      | Absence (-) | Total |
|----------------------------------|-----------------------------------|-------------|-------|
| <b>Microfilaremia (vertical)</b> | <b>% Circular / Linear / Both</b> |             |       |
| <b>Positive (+)</b>              | 2 (25%) / 1 (12,5%) / 5 (62,5%)   | 6           | 14    |
| <b>Negative (-)</b>              | 3 (75%) / 0 / 1 (25%)             | 4           | 8     |
|                                  | 12                                | 10          | 22    |

p-value: 0.4266

1  
2  
3  
4  
5  
6  
7  
8  
9  
10  
11  
12  
13  
14  
15  
16  
17  
18  
19  
20  
21  
22  
23  
24  
25  
26  
27  
28  
29  
30  
31  
32  
33  
34  
35  
36  
37  
38  
39  
40  
41  
42  
43  
44  
45  
46  
47  
48  
49  
50  
51  
52  
53  
54  
55  
56  
57  
58  
59  
60

5) **Acknowledgments:**

*Funding/Support:* FAPESP (Fundação de Amparo à Pesquisa do Estado de São Paulo or Foundation for Research Support of São Paulo State).

*Mansonella-Brazil Group:* Belfort Jr RB, Borborema M, Cohen J, Cohen MJ, Cunha P, Fontes G, Martins M, Medeiros JF, Pessoa, FAC, Vianna LMM, Zanelato T

1  
2  
3  
4  
5  
6  
7  
8  
9  
10  
11  
12  
13  
14  
15  
16  
17  
18  
19  
20  
21  
22  
23  
24  
25  
26  
27  
28  
29  
30  
31  
32  
33  
34  
35  
36  
37  
38  
39  
40  
41  
42  
43  
44  
45  
46  
47  
48  
49  
50  
51  
52  
53  
54  
55  
56  
57  
58  
59  
60

6) **Competing Interests Statement:**

We state that none of the authors have competing interests.

For peer review only



1  
2  
3  
4  
5  
6  
7  
8  
9  
10  
11  
12  
13  
14  
15  
16  
17  
18  
19  
20  
21  
22  
23  
24  
25  
26  
27  
28  
29  
30  
31  
32  
33  
34  
35  
36  
37  
38  
39  
40  
41  
42  
43  
44  
45  
46  
47  
48  
49  
50  
51  
52  
53  
54  
55  
56  
57  
58  
59  
60

7) **Contributorship Statement:**

We state that all authors contributed in the:

- 1) Conception and design of the study;
- 2) Acquisition, analysis and interpretation of data;
- 3) Drafting and revising of the article;
- 4) Final approval of the version to be published.

For peer review only

1  
2  
3  
4  
5  
6  
7  
8  
9  
10  
11  
12  
13  
14  
15  
16  
17  
18  
19  
20  
21  
22  
23  
24  
25  
26  
27  
28  
29  
30  
31  
32  
33  
34  
35  
36  
37  
38  
39  
40  
41  
42  
43  
44  
45  
46  
47  
48  
49  
50  
51  
52  
53  
54  
55  
56  
57  
58  
59  
60

## 8) References:

1. Branco BC, Chamon W, Belfort R et al. Ocular findings in Pauini (Southwest of the Brazilian Amazon) and possible corneal lesions caused by Mansonella. *Arq Bras Oftalmol.* 1998; Vol 61(6): 647-82.
2. Martins M, Pessoa FA, de Medeiros MB, et al. Mansonella ozzardi in Amazonas, Brazil: prevalence and distribution in the municipality of Coari, in the middle Solimões River. *Mem Inst Oswaldo Cruz.* 2010 May;105(3):246-53.
3. Deane MP. Sobre a incidência de filárias humanas em Manaus, estado do Amazonas. *Rev Serv Esp Saude Publ* 1949 2: 849-858.
4. Oliveira wr. [Filarial infestation in inhabitants of Vila Pereira, territory of Roraima (Brazil)]. *Rev Inst Med Trop Sao Paulo.* 1963 Nov-Dec;5:287-8.
5. D'Andretta Jr, Pio da Silva CM, Kameyana F. Ocorrência da mansonelose entre índios do alto Xingu. *Rev Soc Bras Med Trop* 1969. 3:11.
6. Orihel TC, Eberhard ML. Mansonella ozzardi: a redescription with comments on its taxonomic relationships. *Am J Trop Med Hyg.* 1982 Nov;31(6):1142-7.
7. Morales-Hojas R, Post RJ, Shelley AJ, et al. Characterisation of nuclear ribosomal DNA sequences from *Onchocerca volvulus* and *Mansonella ozzardi* (Nematoda: Filarioidea) and development of a PCR-based method for their

1  
2  
3 detection in skin biopsies. *Int J Parasitol*. 2001 Feb;31(2):169-77. Erratum in: *Int*  
4  
5 *J Parasitol* 2001 Jun;31(8):850-1  
6  
7

- 8  
9  
10 8. BATISTA D, CERQUEIRA NL, MORAES MA. [Epidemiology of Manson's  
11 disease in a locality in the interior of Amazonas]. *Rev Assoc Med Bras*. 1960  
12 Jun;6:176-84.  
13  
14  
15  
16  
17  
18  
19  
20 9. Garrido C, Campos M. First report of presumed parasitic keratitis in Indians from  
21 the Brazilian Amazon. *Cornea*. 2000 Nov;19(6):817-9.  
22  
23  
24  
25  
26  
27  
28  
29 10. Cohen JM, Ribeiro JA, Martins M. [Ocular manifestations in mansonelliasis]. *Arq*  
30 *Bras Oftalmol*. 2008 Mar-Apr;71(2):167-71. Portuguese.  
31  
32  
33  
34  
35  
36  
37 11. Keiser PB, Coulibaly Y, Kubofcik J, et al. Molecular identification of *Wolbachia*  
38 from the filarial nematode *Mansonella perstans*. *Mol Biochem Parasitol*. 2008  
39 Aug;160(2):123-8. Epub 2008 May 2. PubMed PMID: 18538871; PubMed  
40 Central PMCID: PMC2497444.  
41  
42  
43  
44  
45  
46  
47  
48 12. Medeiros JF, Py-Daniel V, Barbosa UC, et al. [Occurrence of *Mansonella ozzardi*  
49 (Nematoda, Onchocercidae) in riverine communities of the Purus river, Boca do  
50 Acre municipality, Amazonas State, Brazil]. *Cad Saude Publica*. 2009  
51 Jun;25(6):1421-6.  
52  
53  
54  
55  
56  
57  
58  
59  
60

- 1  
2  
3  
4  
5  
6  
7  
8  
9  
10  
11  
12  
13  
14  
15  
16  
17  
18  
19  
20  
21  
22  
23  
24  
25  
26  
27  
28  
29  
30  
31  
32  
33  
34  
35  
36  
37  
38  
39  
40  
41  
42  
43  
44  
45  
46  
47  
48  
49  
50  
51  
52  
53  
54  
55  
56  
57  
58  
59  
60
13. Belfort Jr, R e Moraes, M – Oncocercose ocular no Brasil. AMB Rev Assoc Med Bras. 1979 Apr;25(4):123-7.
  14. The Onchocerciasis Elimination Program Sauerbrey for the Americas (OEPA) M. Annals of Tropical Medicine & Parasitology, Vol 102, Supplement No. 1 , S25-S29 (2008)

1  
2  
3  
4  
5  
6  
7  
8  
9  
10  
11 **9) Figure Legends:**

12  
13 Picture 1: Clinical features. (Left and bottom) Central irregular “mottled”  
14 surrounded by a opaque halo opacitie; (Right) Four typical keratitis lesions. All of  
15 them had normal translucent area between the lesions and the limbus, without  
16 the presence of corneal neovascularization.  
17  
18  
19  
20  
21

22  
23  
24 Picture 2. Five different patterns of circular lesions measuring about 80 µm in  
25 diameter, located sub-epithelial, in different patients. The figures are 400 µm x  
26 400 µm.  
27  
28  
29  
30  
31

32  
33  
34 Picture 3. Filiform lesions located above the epithelium basal layer about 300 µm  
35 long and 10 µm wide, with one dichotomized end into a "C" shape and the other  
36 tapered, all in the same patient, who had limbal conjunctiva thick blood smear  
37 positive for *Mansonella ozzardi*. The figures are 400 µm x 400 µm.  
38  
39  
40  
41  
42

43  
44  
45  
46 Picture 4. Microfilaria as detected by thick blood smear and corneal confocal  
47 image from a patient who had both tests performed.  
48  
49  
50  
51  
52  
53  
54  
55  
56  
57  
58  
59  
60

1  
2  
3  
4  
5  
6  
7  
8  
9  
10  
11  
12  
13  
14  
15  
16  
17  
18  
19  
20  
21  
22  
23  
24  
25  
26  
27  
28  
29  
30  
31  
32  
33  
34  
35  
36  
37  
38  
39  
40  
41  
42  
43  
44  
45  
46  
47  
48  
49  
50  
51  
52  
53  
54  
55  
56  
57  
58  
59  
60

For peer review only

1  
2  
3  
4  
5  
6  
7  
8  
9  
10  
11  
12  
13  
14  
15  
16  
17  
18  
19  
20  
21  
22  
23  
24  
25  
26  
27  
28  
29  
30  
31  
32  
33  
34  
35  
36  
37  
38  
39  
40  
41  
42  
43  
44  
45  
46  
47  
48  
49  
50  
51  
52  
53  
54  
55  
56  
57  
58  
59  
60

1) **Title Page:**

**Mansonella ozzardi corneal lesions in the Amazon**

**Authors:** Lucas Monferrari Monteiro Vianna (first author)\*; Marilaine Martins\*\*; Marcos Jacob Cohen\*\*\*, Jacob Cohen\*\*\*, Rubens Belfort Jr\*

\*Vision Institute and Department of Ophthalmology. Hospital São Paulo - Federal University of São Paulo. Address: Botucatu St, 821 – ZIP: 04023-900 – São Paulo/SP - Brazil

\*\* Fundação de Medicina Tropical do Amazonas, Universidade do Estado do Amazonas. Address: Pedro Teixeira Av., 25 - ZIP: 69040-000 - Manaus/AM - Brazil

\*\*\* Universidade Federal do Amazonas (UFAM) / Instituto de Oftalmologia de Manaus (IOM). Address: General Rodrigo Octávio Jordão Ramos Av, 3000, Campus Universitário, Coroado I - 69077-000 - Manaus/AM – Brazil

**Keywords:** Mansonella, microfilaria, keratitis, microscopy, confocal, biopsy



Lucas Monferrari Monteiro Vianna, MD (Corresponding Author)

Department of Ophthalmology / Federal University of Sao Paulo, Sao Paulo, Brazil

Phone: 55-11-7493-8000 - Fax: 55-11-5085-2010 ([lucasmvvianna@yahoo.com.br](mailto:lucasmvvianna@yahoo.com.br))

## **Mansonella ozzardi corneal lesions in the Amazon**

### **Abstract:**

**Purpose:** To characterize and confirm the presence of *Mansonella ozzardi* microfilariae in the cornea by biomicroscopy and corneal confocal microscopy.

**Methods:** Cross-sectional, clinical practice study of 212 consecutive volunteers patients from communities of the rural area of Coari City in the Solimões River, Amazonas State, Brazil. All patients had the eyes examined using a flash light and had blood checked for the presence of microfilariae by expert microscopist. Patients with suspicious corneal lesions (characterized as nummular keratitis) at the eye exam were submitted to biomicroscopy, fundoscopy and corneal confocal microscopy (CCME) evaluation. Two patients underwent biopsy of the limbal conjunctiva adjacent to the nummular keratitis area and blood was collected from the surgical wound for microfilariae investigation by thick blood examination.

**Results:** Of the 212 patients, 56 (26,4%) were positive for microfilaremia. By flash light examination, 22 patients that had nummular keratitis were sent to biomicroscopy and CCME. At biomicroscopy, lesions were divided in quiescent and active. At CCME, they were divided in circular and filiform lesions. The associations between lesions and microfilaremia are shown.

**Conclusions:** We presented some evidences of the presence of *M. ozzardi* microfilariae in the cornea and its pathogenicity to the eye. Further studies using ocular tissue PCR and other image techniques can be helpful.



## 2) Main Text:

### Introduction

Hundreds of types of filariae have been described and a few can cause infections in humans, *Mansonella ozzardi* being one of them and the first description of *M. ozzardi* associated with corneal disease was published in 1998.<sup>1</sup>

*M. ozzardi* is a filaria exclusively found in America and one of the causes of mansonelliasis.<sup>2</sup> In Brazil it is found in the states of Roraima, Mato Grosso and Amazonas.<sup>3,4,5</sup> The microfilariae of *M. ozzardi* are found in peripheral blood and can be identified by their morphological characteristics or by molecular biology.<sup>6,7</sup>

The clinical features of mansonelliasis are not well described. Infected individuals are generally asymptomatic or have signs and symptoms common to other infections such as fever, coldness in the legs, joint pain and headache.<sup>8</sup> They may also include skin and ocular lesions<sup>1,9,10</sup> and be associated with *Wolbachiae*, that are bacterial endosymbionts of insects and many filarial nematodes and their products trigger inflammatory responses<sup>10</sup>.

Coari City, at Solimões River (04°08'S63°07'W) has a high prevalence of *M. ozzardi* infection. Studies showed average infection rate between 13.3% and 18.9%, with higher prevalence in rural areas and patient aging.<sup>2, 10</sup> Onchocerciasis does not exist in this region of the Amazon.<sup>12</sup>

## Materials and Methods

Cross-sectional, clinical practice study of 212 consecutive volunteers patients from communities of the rural area of Coari City in the Solimões River, Amazonas State, Brazil. All patients had their eyes examined using a flash light and had blood checked for the presence of microfilariae by expert microscopist. The peripheral blood infection by *M. ozzardi* was determined by light-microscopy examination (200x and 400x) of Giemsa-stained thick smears of peripheral blood obtained by digital puncture with a sterile disposable lancet<sup>6</sup>, Knott and polycarbonate membrane filtration and by a new identification protocol using the polymerase chain reaction (PCR) (M Martins et al., unpublished observations). Patients with nummular keratitis, similar to those previously described in the literature<sup>1,9,10</sup>, at the eye examination were subjected to biomicroscopy, fundoscopy and corneal confocal microscopy evaluation (CCME), using the Rostock Cornea Module (RCM) of the Heidelberg Retina Tomograph. Photographs were taken at the slit lamp. The CCME was performed in the central cornea and in the corneal regions with the nummular keratitis. Two patients underwent biopsy of the limbal conjunctiva adjacent to the nummular keratitis area and blood was collected from the surgical wound for microfilariae investigation by thick blood examination.

The study was prospective and approved by the UNIFESP Ethical Committee. All participants signed the protocol's informed consent.

Data were presented in contingency tables and Fisher exact test was used to compare proportions. P-values less than 0.05 were considered statistically significant. Analyses were done in Stata v.11 (College Station, Texas).

1  
2  
3 We have no competing interests.  
4  
5  
6  
7

## 8 Results

9  
10 Of the 212 patients, 56 (26,4%) were positive for microfilaremia. By flash light  
11 examination, 22 patients that had nummular keratitis were sent to biomicroscopy and  
12 CCME. Four of them had bilateral lesions. The association between microfilaremia and  
13  
14  
15  
16  
17  
18 cornea lesions is shown in table 1, with statistically significant finding.

19  
20 At biomicroscopy, some lesions were characterized as nummular, mid periphery and  
21  
22 anterior stroma corneal opacities, 0.5 to 1.0 mm in diameter with central mottled  
23  
24 surrounded by a opaque halo, with marked limit between the white opacity and the clear  
25  
26 cornea. Other lesions were characterized by nummular keratitis, also located at mid  
27  
28 periphery and anterior stroma .In all cases there was a normal translucent area between  
29  
30 the corneal lesions and the limbus and absence of corneal neovascularization or other  
31  
32 changes (Picture 1). The clinical characteristics of the lesions as well as the high  
33  
34 prevalence exclude the possibility of traumas and other known causes for the  
35  
36 differential diagnosis, specifically Onchocercosis. The association between nummular  
37  
38  
39  
40  
41  
42 keratitis and microfilaremia is shown in table 2.

43  
44 Among the 22 patients with corneal lesions at biomicroscopy, 12 presented suspected  
45  
46 related lesions also at the CCME. These confocal suspected lesions was presented in  
47  
48 two patterns: circular (increased reflectivity, measuring about 80 micra in diameter,  
49  
50 located at the sub-epithelial level, as shown in picture 2) and linear (filiform lesions  
51  
52 ranging from 250 to 300 µm in length and 10 to 15 µm wide, with one "C" shape end  
53  
54 and the other tapered, as shown in picture 3). Five patients presented only circular  
55  
56  
57  
58  
59  
60

1  
2  
3 lesions, one patient only linear lesions and six patients had both of them. The  
4  
5 association between confocal lesions and microfilaremia is shown in table 3.  
6  
7

8 In two volunteers patients with linear lesions, thick blood smear of the limbal conjunctiva  
9  
10 was performed and confirmed the microfilaremia. Picture 4 compares microfilaria of *M.*  
11  
12 *ozzardi* seen at the thick blood smear with the confocal microscopy image.  
13  
14

15 Acknowledgement for Funding/Support to FAPESP (Fundação de Amparo à Pesquisa  
16  
17 do Estado de São Paulo or Foundation for Research Support of São Paulo State) and  
18  
19 for technical support for *Mansonella*-Brazil Group (Belfort Jr RB, Borborema M, Cohen  
20  
21 J, Cohen MJ, Cunha P, Fontes G, Martins M, Medeiros JF, Pessoa, FAC, Vianna LMM,  
22  
23 Zanelato T).  
24  
25  
26  
27  
28  
29  
30

### 31 Discussion

32  
33

34 The prevalence of *M. ozzardi* is high in some riverside communities in Amazon with the  
35  
36 increasing occupation of rainforest areas.<sup>2,12</sup> Previous studies in Coari city showed an  
37  
38 average infection rate between 13.3% and 18.9%, with higher prevalence in rural areas  
39  
40 and patient aging.<sup>2, 10</sup> In the present study, the prevalence was of 26,4%.  
41  
42

43 Presumed keratitis caused by *M. ozzardi* has been described in Brazil by us as well as  
44  
45 other authors, with no other defined etiology related.<sup>1,9,10</sup> A comparison with other filarial  
46  
47 diseases shows some similarities with onchocerciasis but there is no onchocerciasis  
48  
49 in those parts of Brazil and also the clinical picture is different. Onchocerciasis has been  
50  
51 excluded by the characteristics of the microfilaria tail and because it exists in Brazil only  
52  
53  
54  
55  
56  
57  
58  
59  
60

1  
2  
3 close to the Venezuela border, in the Yanomami Indian Reservation.<sup>13,14</sup> None of the  
4  
5 patients lived or visited areas where *Onchocerca exist*.  
6  
7

8 A study conducted in Pauini, at the Purus River revealed 20 non-Indian habitants with  
9  
10 peripheral corneal opacities among 524 patients examined. No microfilariae were seen  
11  
12 in the skin snips and *Mansonella sp* was found in the blood of the 2 patients where it  
13  
14 was possible to collect blood.<sup>1</sup> Another study, conducted in São Gabriel da Cachoeira  
15  
16 (Negro River) showed a positive association between *M. ozzardi* and corneal lesions  
17  
18 with all patients presenting ocular changes having *M. ozzardi* microfilariae in blood  
19  
20 samples.<sup>9</sup> All the skin biopsies were negative for microfilaria including *Onchocerca*. The  
21  
22 association between the keratitis and positive microfilaremia in the Amazon was also  
23  
24 related by Cohen et al.<sup>10</sup> In our study, this association was also found, with statistically  
25  
26 significant finding, as shown in table 1.  
27  
28  
29  
30

31 The aspect of corneal lesions was divided by its characteristics in only corneal opacities  
32  
33 and keratitis, as shown in picture 1. Among patients positive for microfilaremia, the  
34  
35 proportion of keratitis aspect seems to be higher and among patients negative for  
36  
37 microfilaria, the proportion of only opacity aspect was higher (table 2). One explanation  
38  
39 for the presence of patients with keratitis lesion and negative microfilaremia could be  
40  
41 false negatives in the blood tests. Patients with only opacity lesion and positive  
42  
43 microfilaremia could be explained by chronic infection.  
44  
45  
46  
47

48 Like in previous studies,<sup>1,9,10</sup> we could not detect, by biomicroscopy, filariae in any  
49  
50 ocular tissue, but corneal lesions similar to previous descriptions were found. Using  
51  
52 CCME, we detected not previously described lesions. Among patients positive for  
53  
54 microfilaremia, the proportion of confocal lesions was higher (table 3). The confocal  
55  
56  
57  
58  
59  
60

1  
2  
3 lesions were divided by their aspects in linear and circular. Among patients with lesions  
4 identified by CCME, there was a higher proportion of patients positive for microfilaremia  
5 and a higher proportion of circular aspect alone among patients negative for  
6 microfilaremia (table 3). It could suggest that linear lesions are associated with active  
7 disease and circular lesions with inflammatory scars, associated or not with active  
8 disease. The size of linear lesions (250-300 microns) on CCME was higher than  
9 showed in microbiological studies (149-240 microns)<sup>6</sup>. The microfilariae are probably  
10 dead in ocular tissues and could enlarge due to inflammatory reaction. Circular lesions  
11 could represent, besides inflammatory reaction surrounding dead microfilariae, cross  
12 section of remnants of adult worms (26 to 49 mm in length by 0.07 to 0.15 mm in  
13 diameter)<sup>6</sup>.

14  
15  
16  
17  
18  
19  
20  
21  
22  
23  
24  
25  
26  
27  
28  
29 Unaffected patients were not tested due to difficulties of field work. We performed  
30 confocal microscopy in both eyes of all the 22 patients with keratitis. In the 18 with  
31 unilateral keratitis, the non affected fellow eye never showed alterations in the confocal  
32 microscopy.

### 33 34 35 36 37 38 39 40 41 Conclusion

42  
43 We presented some evidences of the presence of *M. ozzardi* microfilariae in the cornea  
44 and its pathogenicity to the eye. Further studies using ocular tissue PCR and other  
45 image techniques can be helpful.  
46  
47  
48  
49  
50  
51  
52  
53  
54  
55  
56  
57  
58  
59  
60

#### 4) Tables:

Table 1. Association between microfilaremia and corneal lesions.

| Corneal Lesions (horizontal) | Presence<br>(+) | Absence<br>(-) | Total             |
|------------------------------|-----------------|----------------|-------------------|
| Microfilaremia (vertical)    |                 |                |                   |
| Positive (+)                 | 14 (63,6%)      | 42 (22%)       | 56                |
| Negative (-)                 | 8 (33,4%)       | 148 (88%)      | 156               |
| <b>Total</b>                 | <b>22</b>       | <b>190</b>     | <b>212 (100%)</b> |

p-value: 0.0001

Table 2. Association between nummular keratitis and microfilaremia.

| Keratitis lesions (horizontal) | Presence<br>(+) | Absence<br>(-) | Total            |
|--------------------------------|-----------------|----------------|------------------|
| Microfilaremia (vertical)      |                 |                |                  |
| Positive (+)                   | 10 (76,9%)      | 4 (44%)        | 14               |
| Negative (-)                   | 3 (23,1%)       | 5 (56%)        | 8                |
| <b>Total</b>                   | <b>13</b>       | <b>9</b>       | <b>22 (100%)</b> |

p-value: 0.1347

Table 3. Association between confocal lesions and microfilaremia.

| Confocal lesion (horizontal)     | Presence (+)                      | Absence (-) | Total |
|----------------------------------|-----------------------------------|-------------|-------|
| <b>Microfilaremia (vertical)</b> | <b>% Circular / Linear / Both</b> |             |       |
| <b>Positive (+)</b>              | 2 (25%) / 1 (12,5%) / 5 (62,5%)   | 6           | 14    |
| <b>Negative (-)</b>              | 3 (75%) / 0 / 1 (25%)             | 4           | 8     |
|                                  | 12                                | 10          | 22    |

p-value: 0.4266

For peer review only



1  
2  
3  
4  
5  
6  
7  
8  
9  
10  
11  
12  
13  
14  
15  
16  
17  
18  
19  
20  
21  
22  
23  
24  
25  
26  
27  
28  
29  
30  
31  
32  
33  
34  
35  
36  
37  
38  
39  
40  
41  
42  
43  
44  
45  
46  
47  
48  
49  
50  
51  
52  
53  
54  
55  
56  
57  
58  
59  
60

5) **Acknowledgments:**

*Funding/Support:* FAPESP (Fundação de Amparo à Pesquisa do Estado de São Paulo or Foundation for Research Support of São Paulo State).

*Mansonella-Brazil Group:* Belfort Jr RB, Borborema M, Cohen J, Cohen MJ, Cunha P, Fontes G, Martins M, Medeiros JF, Pessoa, FAC, Vianna LMM, Zanelato T

1  
2  
3  
4  
5  
6  
7  
8  
9  
10  
11  
12  
13  
14  
15  
16  
17  
18  
19  
20  
21  
22  
23  
24  
25  
26  
27  
28  
29  
30  
31  
32  
33  
34  
35  
36  
37  
38  
39  
40  
41  
42  
43  
44  
45  
46  
47  
48  
49  
50  
51  
52  
53  
54  
55  
56  
57  
58  
59  
60

6) **Competing Interests Statement:**

We state that none of the authors have competing interests.

For peer review only

1  
2  
3  
4  
5  
6  
7  
8  
9  
10  
11  
12  
13  
14  
15  
16  
17  
18  
19  
20  
21  
22  
23  
24  
25  
26  
27  
28  
29  
30  
31  
32  
33  
34  
35  
36  
37  
38  
39  
40  
41  
42  
43  
44  
45  
46  
47  
48  
49  
50  
51  
52  
53  
54  
55  
56  
57  
58  
59  
60

7) **Contributorship Statement:**

We state that all authors contributed in the:

- 1) Conception and design of the study;
  - 2) Acquisition, analysis and interpretation of data;
  - 3) Drafting and revising of the article;
  - 4) Final approval of the version to be published.
- For peer review only

1  
2  
3  
4  
5  
6  
7  
8  
9  
10  
11  
12  
13  
14  
15  
16  
17  
18  
19  
20  
21  
22  
23  
24  
25  
26  
27  
28  
29  
30  
31  
32  
33  
34  
35  
36  
37  
38  
39  
40  
41  
42  
43  
44  
45  
46  
47  
48  
49  
50  
51  
52  
53  
54  
55  
56  
57  
58  
59  
60

## 8) References:

1. Branco BC, Chamon W, Belfort R et al. Ocular findings in Pauini (Southwest of the Brazilian Amazon) and possible corneal lesions caused by Mansonella. *Arq Bras Oftalmol.* 1998; Vol 61(6): 647-82.
2. Martins M, Pessoa FA, de Medeiros MB, et al. Mansonella ozzardi in Amazonas, Brazil: prevalence and distribution in the municipality of Coari, in the middle Solimões River. *Mem Inst Oswaldo Cruz.* 2010 May;105(3):246-53.
3. Deane MP. Sobre a incidência de filárias humanas em Manaus, estado do Amazonas. *Rev Serv Esp Saude Publ* 1949 2: 849-858.
4. Oliveira wr. [Filarial infestation in inhabitants of Vila Pereira, territory of Roraima (Brazil)]. *Rev Inst Med Trop Sao Paulo.* 1963 Nov-Dec;5:287-8.
5. D'Andretta Jr, Pio da Silva CM, Kameyana F. Ocorrência da mansonelose entre índios do alto Xingu. *Rev Soc Bras Med Trop* 1969. 3:11.
6. Orihel TC, Eberhard ML. Mansonella ozzardi: a redescription with comments on its taxonomic relationships. *Am J Trop Med Hyg.* 1982 Nov;31(6):1142-7.
7. Morales-Hojas R, Post RJ, Shelley AJ, et al. Characterisation of nuclear ribosomal DNA sequences from *Onchocerca volvulus* and *Mansonella ozzardi* (Nematoda: Filarioidea) and development of a PCR-based method for their

1  
2  
3 detection in skin biopsies. *Int J Parasitol*. 2001 Feb;31(2):169-77. Erratum in: *Int*  
4  
5 *J Parasitol* 2001 Jun;31(8):850-1  
6  
7

- 8  
9  
10 8. BATISTA D, CERQUEIRA NL, MORAES MA. [Epidemiology of Manson's  
11 disease in a locality in the interior of Amazonas]. *Rev Assoc Med Bras*. 1960  
12 Jun;6:176-84.  
13  
14  
15  
16  
17  
18  
19  
20 9. Garrido C, Campos M. First report of presumed parasitic keratitis in Indians from  
21 the Brazilian Amazon. *Cornea*. 2000 Nov;19(6):817-9.  
22  
23  
24  
25  
26  
27  
28  
29 10. Cohen JM, Ribeiro JA, Martins M. [Ocular manifestations in mansonelliasis]. *Arq*  
30 *Bras Oftalmol*. 2008 Mar-Apr;71(2):167-71. Portuguese.  
31  
32  
33  
34  
35  
36  
37 11. Keiser PB, Coulibaly Y, Kubofcik J, et al. Molecular identification of Wolbachia  
38 from the filarial nematode *Mansonella perstans*. *Mol Biochem Parasitol*. 2008  
39 Aug;160(2):123-8. Epub 2008 May 2. PubMed PMID: 18538871; PubMed  
40 Central PMCID: PMC2497444.  
41  
42  
43  
44  
45  
46  
47  
48 12. Medeiros JF, Py-Daniel V, Barbosa UC, et al. [Occurrence of *Mansonella ozzardi*  
49 (Nematoda, Onchocercidae) in riverine communities of the Purus river, Boca do  
50 Acre municipality, Amazonas State, Brazil]. *Cad Saude Publica*. 2009  
51 Jun;25(6):1421-6.  
52  
53  
54  
55  
56  
57  
58  
59  
60

- 1  
2  
3 13. Belfort Jr, R e Moraes, M – Oncocercose ocular no Brasil. AMB Rev Assoc Med  
4  
5 Bras. 1979 Apr;25(4):123-7.  
6  
7  
8  
9
- 10 14. The Onchocerciasis Elimination Program Sauerbrey for the Americas (OEPA) M.  
11  
12 Annals of Tropical Medicine & Parasitology, Vol 102, Supplement No. 1 , S25-  
13  
14 S29 (2008)  
15  
16  
17  
18  
19  
20  
21  
22  
23  
24  
25  
26  
27  
28  
29  
30  
31  
32  
33  
34  
35  
36  
37  
38  
39  
40  
41  
42  
43  
44  
45  
46  
47  
48  
49  
50  
51  
52  
53  
54  
55  
56  
57  
58  
59  
60

1  
2  
3  
4  
5  
6  
7  
8  
9  
10  
11 **9) Figure Legends:**

12  
13 Picture 1: Clinical features. (Left and bottom) Central irregular “mottled”  
14 surrounded by a opaque halo opacitie; (Right) Four typical keratitis lesions. All of  
15 them had normal translucent area between the lesions and the limbus, without  
16 the presence of corneal neovascularization.  
17  
18  
19  
20  
21

22  
23  
24 Picture 2. Five different patterns of circular lesions measuring about 80 µm in  
25 diameter, located sub-epithelial, in different patients. The figures are 400 µm x  
26 400 µm.  
27  
28  
29  
30  
31

32  
33  
34 Picture 3. Filiform lesions located above the epithelium basal layer about 300 µm  
35 long and 10 µm wide, with one dichotomized end into a "C" shape and the other  
36 tapered, all in the same patient, who had limbal conjunctiva thick blood smear  
37 positive for *Mansonella ozzardi*. The figures are 400 µm x 400 µm.  
38  
39  
40  
41  
42

43  
44  
45  
46 Picture 4. Microfilaria as detected by thick blood smear and corneal confocal  
47 image from a patient who had both tests performed.  
48  
49  
50  
51  
52  
53  
54  
55  
56  
57  
58  
59  
60

1  
2  
3  
4  
5  
6  
7  
8  
9  
10  
11  
12  
13  
14  
15  
16  
17  
18  
19  
20  
21  
22  
23  
24  
25  
26  
27  
28  
29  
30  
31  
32  
33  
34  
35  
36  
37  
38  
39  
40  
41  
42  
43  
44  
45  
46  
47  
48  
49  
50  
51  
52  
53  
54  
55  
56  
57  
58  
59  
60

For peer review only



1  
2  
3 **PICTURES:**  
4  
5  
6

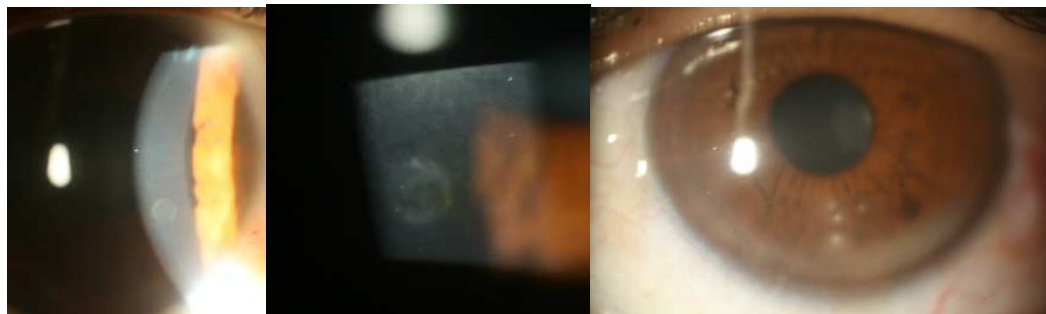

17  
18  
19 Picture 1: Clinical features. (Left and bottom) Central irregular “mottled” surrounded by a  
20 opaque halo opacitie; (Right) Four typical keratitis lesions. All of them had normal  
21 translucent area between the lesions and the limbus, without the presence of corneal  
22 neovascularization.  
23  
24  
25  
26

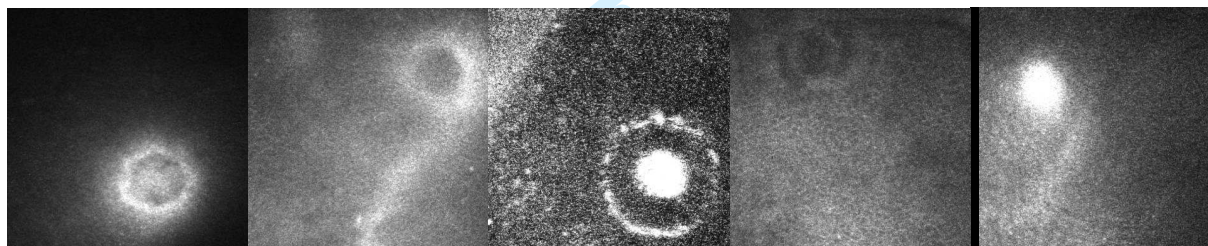

37  
38  
39 Picture 2. Five different patterns of circular lesions measuring about 80 μm in diameter,  
40 located sub-epithelial, in different patients. The figures are 400 μm x 400 μm.  
41  
42  
43  
44  
45  
46  
47  
48  
49  
50  
51  
52  
53  
54  
55  
56  
57  
58  
59  
60



Picture 3. Filiform lesions located above the epithelium basal layer about 300  $\mu\text{m}$  long and 10  $\mu\text{m}$  wide, with one dichotomized end into a "C" shape and the other tapered, all in the same patient, who had limbal conjunctiva thick blood smear positive for *Mansonella ozzardi*. The figures are 400  $\mu\text{m}$  x 400  $\mu\text{m}$ .

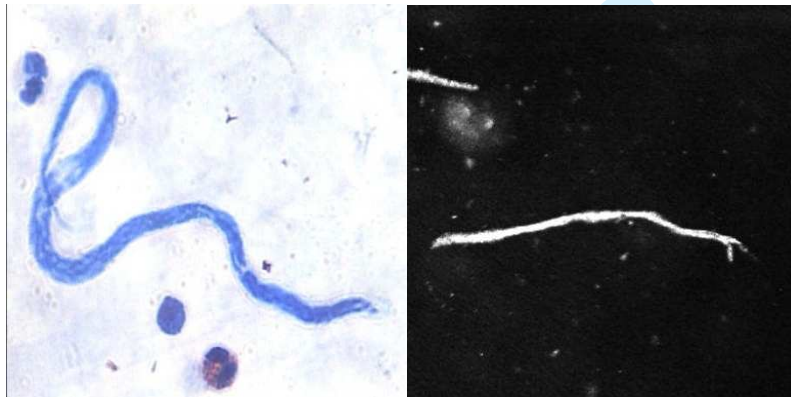

Picture 4. Microfilaria as detected by thick blood smear and corneal confocal image from a patient who had both tests performed.

1  
2  
3  
4  
5  
6  
7  
8  
9  
10  
11  
12  
13  
14  
15  
16  
17  
18  
19  
20  
21  
22  
23  
24  
25  
26  
27  
28  
29  
30  
31  
32  
33  
34  
35  
36  
37  
38  
39  
40  
41  
42  
43  
44  
45  
46  
47  
48  
49  
50  
51  
52  
53  
54  
55  
56  
57  
58  
59  
60

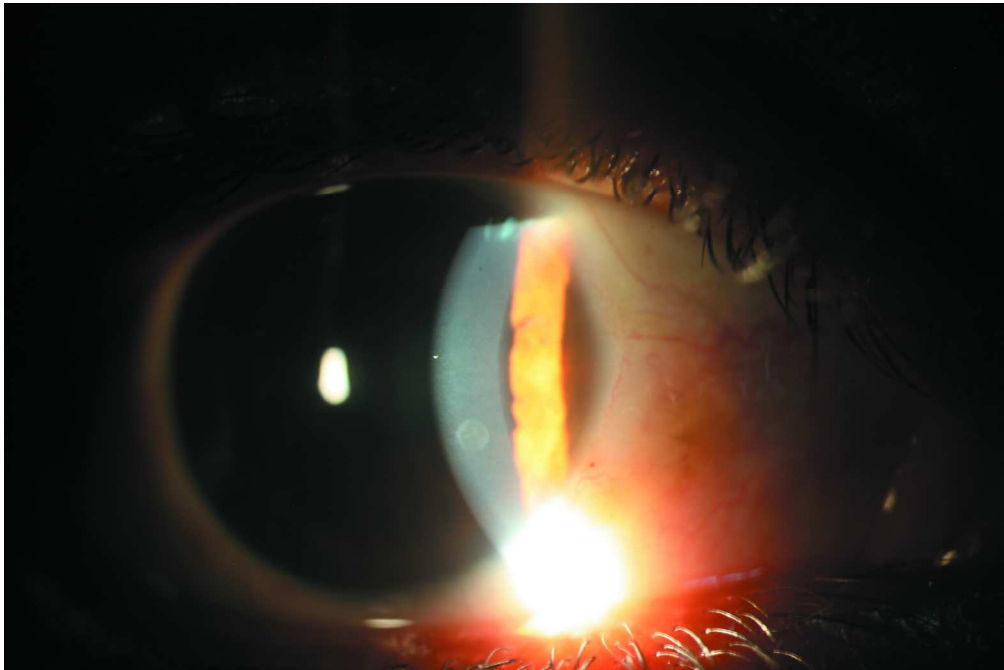

199x133mm (300 x 300 DPI)

Review only

1  
2  
3  
4  
5  
6  
7  
8  
9  
10  
11  
12  
13  
14  
15  
16  
17  
18  
19  
20  
21  
22  
23  
24  
25  
26  
27  
28  
29  
30  
31  
32  
33  
34  
35  
36  
37  
38  
39  
40  
41  
42  
43  
44  
45  
46  
47  
48  
49  
50  
51  
52  
53  
54  
55  
56  
57  
58  
59  
60



199x133mm (300 x 300 DPI)

Review only

1  
2  
3  
4  
5  
6  
7  
8  
9  
10  
11  
12  
13  
14  
15  
16  
17  
18  
19  
20  
21  
22  
23  
24  
25  
26  
27  
28  
29  
30  
31  
32  
33  
34  
35  
36  
37  
38  
39  
40  
41  
42  
43  
44  
45  
46  
47  
48  
49  
50  
51  
52  
53  
54  
55  
56  
57  
58  
59  
60

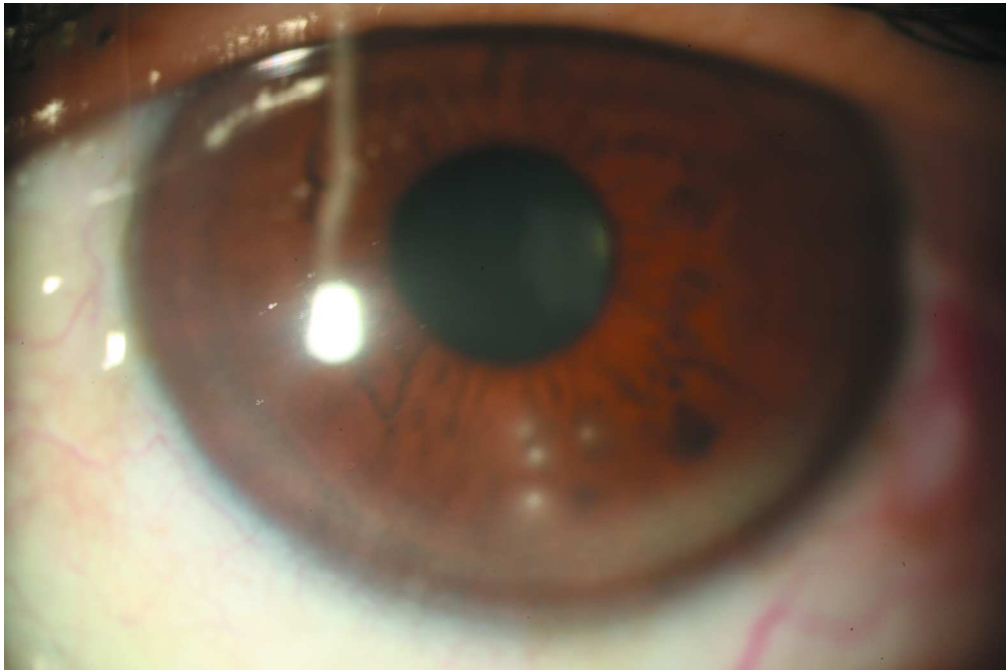

199x133mm (300 x 300 DPI)

Review only

1  
2  
3  
4  
5  
6  
7  
8  
9  
10  
11  
12  
13  
14  
15  
16  
17  
18  
19  
20  
21  
22  
23  
24  
25  
26  
27  
28  
29  
30  
31  
32  
33  
34  
35  
36  
37  
38  
39  
40  
41  
42  
43  
44  
45  
46  
47  
48  
49  
50  
51  
52  
53  
54  
55  
56  
57  
58  
59  
60

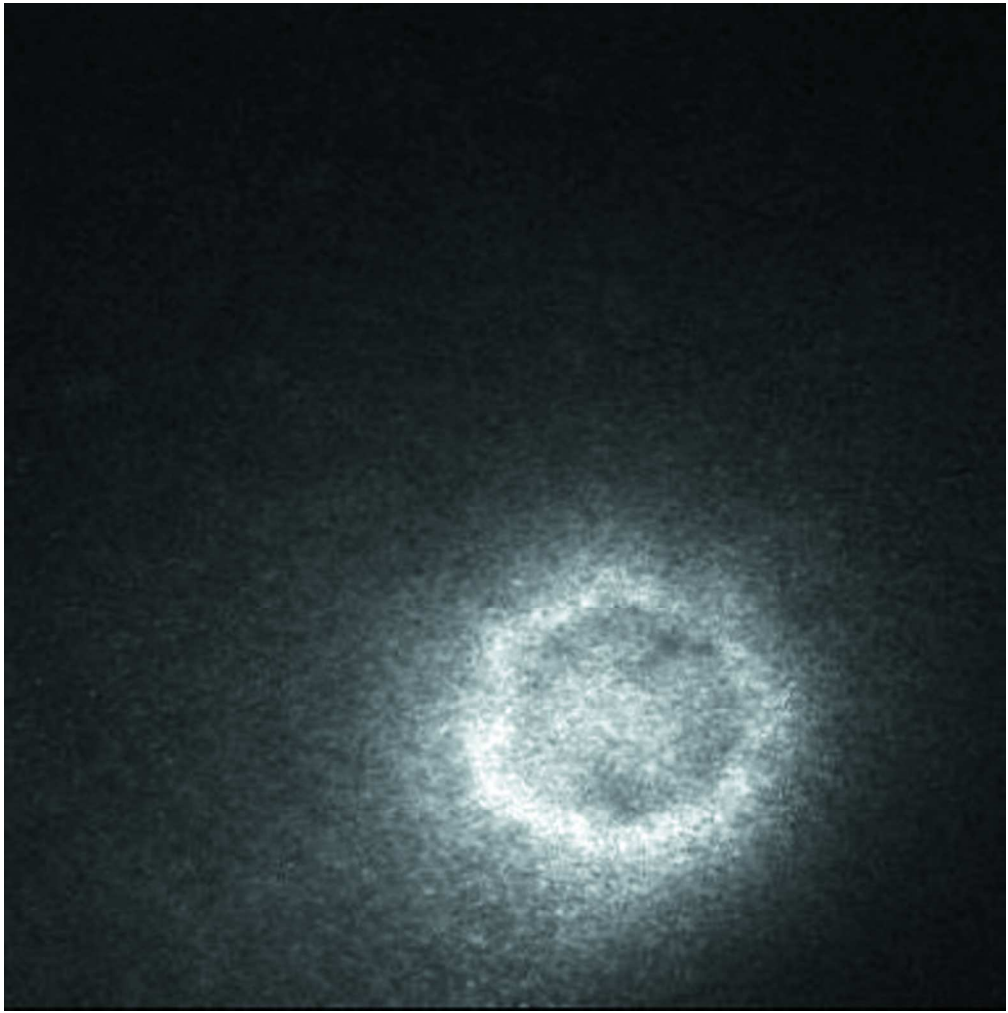

129x130mm (300 x 300 DPI)



1  
2  
3  
4  
5  
6  
7  
8  
9  
10  
11  
12  
13  
14  
15  
16  
17  
18  
19  
20  
21  
22  
23  
24  
25  
26  
27  
28  
29  
30  
31  
32  
33  
34  
35  
36  
37  
38  
39  
40  
41  
42  
43  
44  
45  
46  
47  
48  
49  
50  
51  
52  
53  
54  
55  
56  
57  
58  
59  
60



134x135mm (300 x 300 DPI)



1  
2  
3  
4  
5  
6  
7  
8  
9  
10  
11  
12  
13  
14  
15  
16  
17  
18  
19  
20  
21  
22  
23  
24  
25  
26  
27  
28  
29  
30  
31  
32  
33  
34  
35  
36  
37  
38  
39  
40  
41  
42  
43  
44  
45  
46  
47  
48  
49  
50  
51  
52  
53  
54  
55  
56  
57  
58  
59  
60

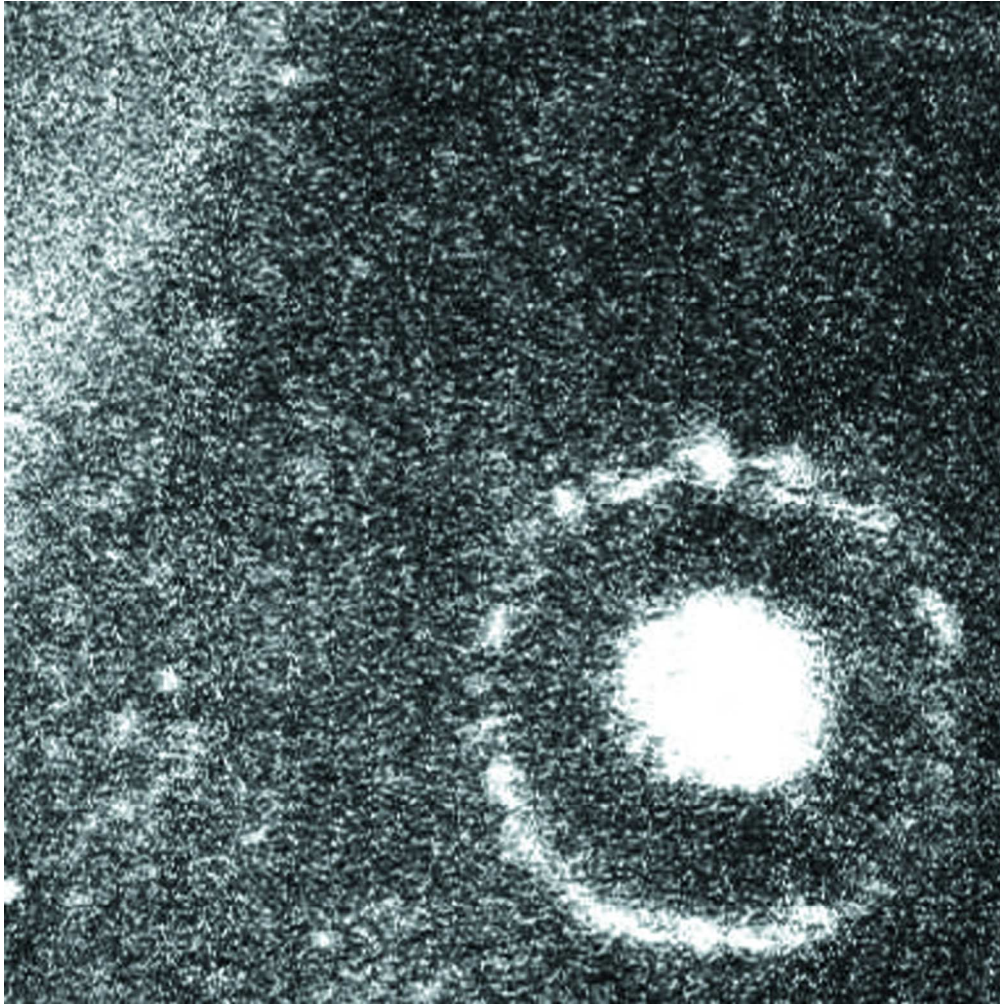

134x135mm (300 x 300 DPI)

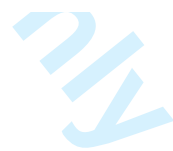



1  
2  
3  
4  
5  
6  
7  
8  
9  
10  
11  
12  
13  
14  
15  
16  
17  
18  
19  
20  
21  
22  
23  
24  
25  
26  
27  
28  
29  
30  
31  
32  
33  
34  
35  
36  
37  
38  
39  
40  
41  
42  
43  
44  
45  
46  
47  
48  
49  
50  
51  
52  
53  
54  
55  
56  
57  
58  
59  
60

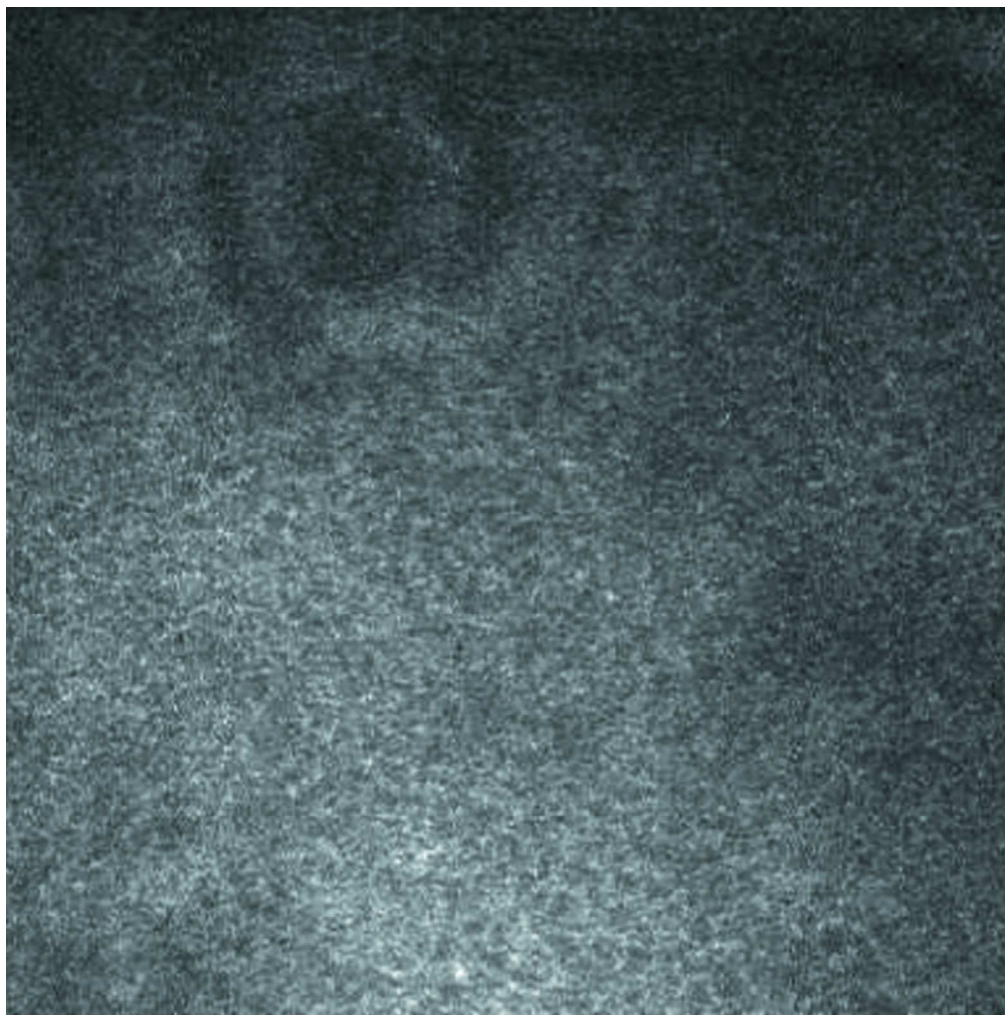

134x135mm (300 x 300 DPI)



1  
2  
3  
4  
5  
6  
7  
8  
9  
10  
11  
12  
13  
14  
15  
16  
17  
18  
19  
20  
21  
22  
23  
24  
25  
26  
27  
28  
29  
30  
31  
32  
33  
34  
35  
36  
37  
38  
39  
40  
41  
42  
43  
44  
45  
46  
47  
48  
49  
50  
51  
52  
53  
54  
55  
56  
57  
58  
59  
60



134x133mm (300 x 300 DPI)

BMJ

1  
2  
3  
4  
5  
6  
7  
8  
9  
10  
11  
12  
13  
14  
15  
16  
17  
18  
19  
20  
21  
22  
23  
24  
25  
26  
27  
28  
29  
30  
31  
32  
33  
34  
35  
36  
37  
38  
39  
40  
41  
42  
43  
44  
45  
46  
47  
48  
49  
50  
51  
52  
53  
54  
55  
56  
57  
58  
59  
60

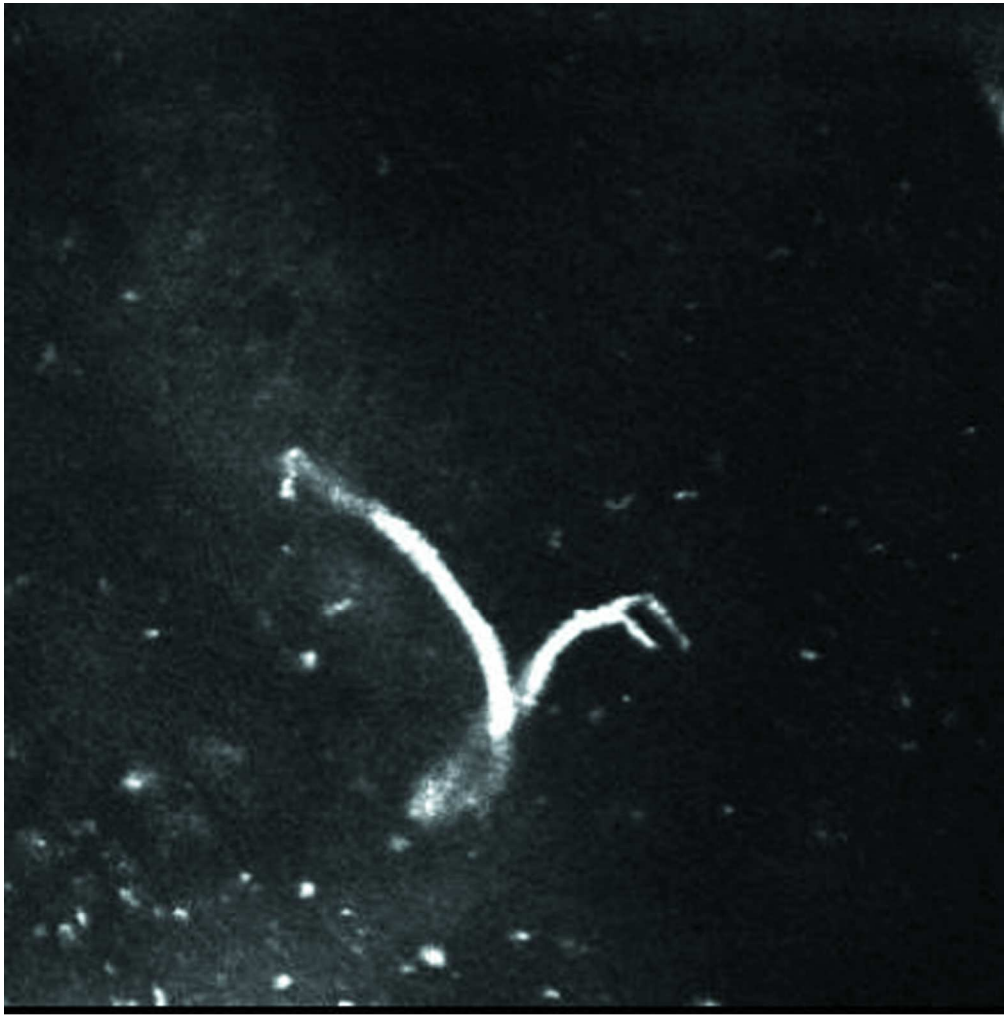

134x135mm (300 x 300 DPI)

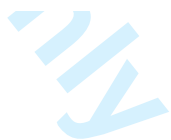

1  
2  
3  
4  
5  
6  
7  
8  
9  
10  
11  
12  
13  
14  
15  
16  
17  
18  
19  
20  
21  
22  
23  
24  
25  
26  
27  
28  
29  
30  
31  
32  
33  
34  
35  
36  
37  
38  
39  
40  
41  
42  
43  
44  
45  
46  
47  
48  
49  
50  
51  
52  
53  
54  
55  
56  
57  
58  
59  
60

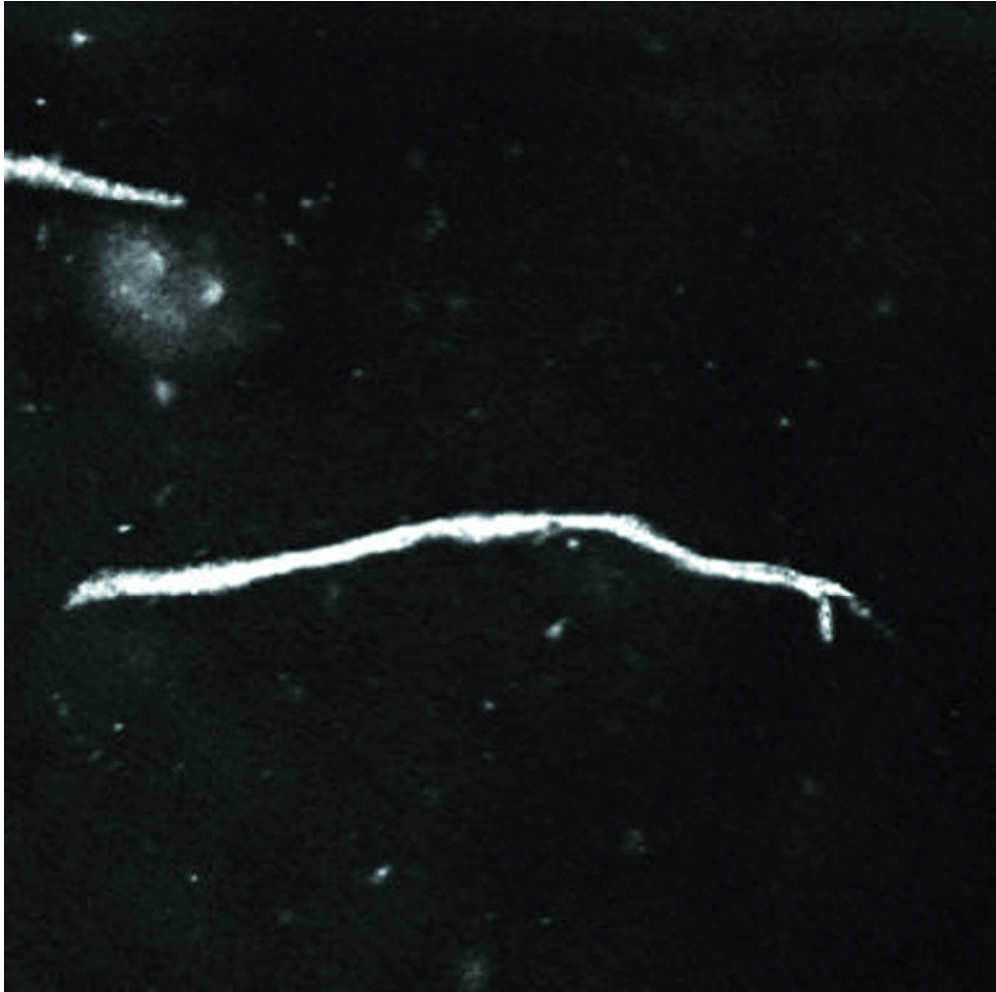

135x134mm (300 x 300 DPI)

only

1  
2  
3  
4  
5  
6  
7  
8  
9  
10  
11  
12  
13  
14  
15  
16  
17  
18  
19  
20  
21  
22  
23  
24  
25  
26  
27  
28  
29  
30  
31  
32  
33  
34  
35  
36  
37  
38  
39  
40  
41  
42  
43  
44  
45  
46  
47  
48  
49  
50  
51  
52  
53  
54  
55  
56  
57  
58  
59  
60



134x134mm (300 x 300 DPI)

BMJ

1  
2  
3  
4  
5  
6  
7  
8  
9  
10  
11  
12  
13  
14  
15  
16  
17  
18  
19  
20  
21  
22  
23  
24  
25  
26  
27  
28  
29  
30  
31  
32  
33  
34  
35  
36  
37  
38  
39  
40  
41  
42  
43  
44  
45  
46  
47  
48  
49  
50  
51  
52  
53  
54  
55  
56  
57  
58  
59  
60



134x134mm (300 x 300 DPI)

BMJ

1  
2  
3  
4  
5  
6  
7  
8  
9  
10  
11  
12  
13  
14  
15  
16  
17  
18  
19  
20  
21  
22  
23  
24  
25  
26  
27  
28  
29  
30  
31  
32  
33  
34  
35  
36  
37  
38  
39  
40  
41  
42  
43  
44  
45  
46  
47  
48  
49  
50  
51  
52  
53  
54  
55  
56  
57  
58  
59  
60

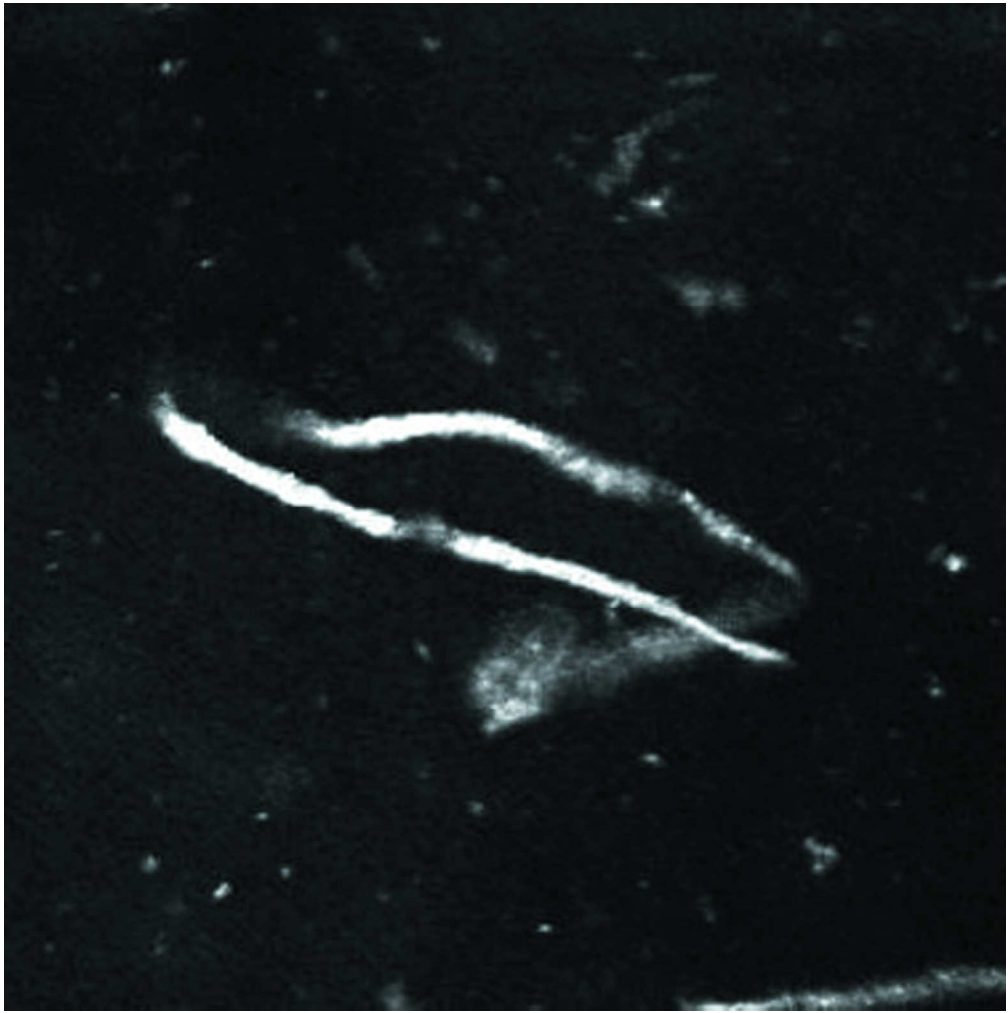

132x133mm (300 x 300 DPI)



1  
2  
3  
4  
5  
6  
7  
8  
9  
10  
11  
12  
13  
14  
15  
16  
17  
18  
19  
20  
21  
22  
23  
24  
25  
26  
27  
28  
29  
30  
31  
32  
33  
34  
35  
36  
37  
38  
39  
40  
41  
42  
43  
44  
45  
46  
47  
48  
49  
50  
51  
52  
53  
54  
55  
56  
57  
58  
59  
60



150x112mm (300 x 300 DPI)

ew only



1  
2  
3  
4  
5  
6  
7  
8  
9  
10  
11  
12  
13  
14  
15  
16  
17  
18  
19  
20  
21  
22  
23  
24  
25  
26  
27  
28  
29  
30  
31  
32  
33  
34  
35  
36  
37  
38  
39  
40  
41  
42  
43  
44  
45  
46  
47  
48  
49  
50  
51  
52  
53  
54  
55  
56  
57  
58  
59  
60

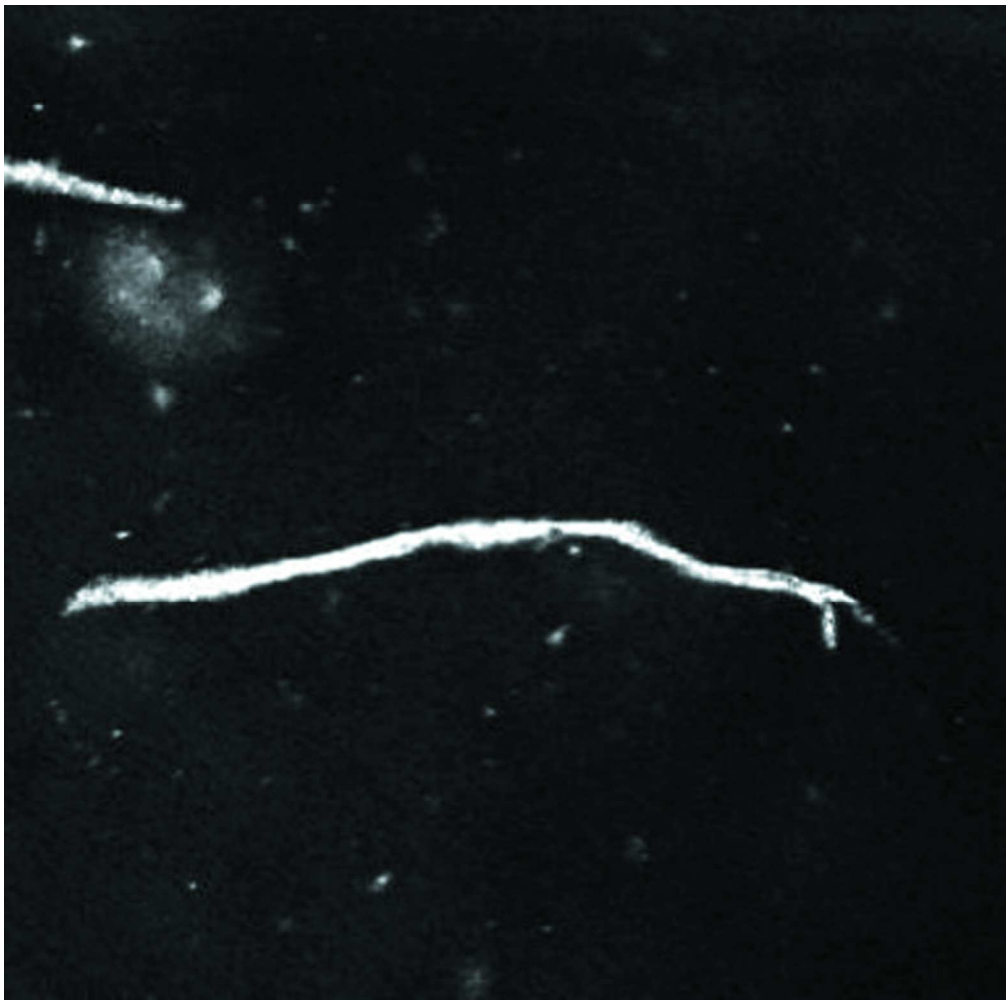

134x134mm (300 x 300 DPI)

univ

1  
2  
3 **Competing Interests and Contributorship Statements:**  
4  
5  
6  
7

8  
9 **Article: *Mansonella ozzardi* corneal lesions in the Amazon**  
10

11  
12 **Authors:** Lucas Monferrari Monteiro Vianna, Marilaine Martins, Marcos Jacob Cohen,  
13  
14 Jacob Cohen, Rubens Belfort Jr  
15  
16

17  
18  
19  
20 **Statetment:**  
21

22 We state that none of us have competing interests.  
23

24 We also state that all of us contributed in the conception and design of the study,  
25 acquisition, analysis and interpretation of data, drafting and revising of the article and  
26  
27 the final approval of the version to be published.  
28  
29  
30  
31  
32  
33  
34  
35  
36  
37  
38  
39  
40  
41  
42  
43  
44  
45  
46  
47  
48  
49  
50  
51  
52  
53  
54  
55  
56  
57  
58  
59  
60

**Response (highlighted) to the reviewers comments:**

1  
2  
3  
4  
5  
6  
7  
8  
9  
10  
11  
12  
13  
14  
15  
16  
17  
18  
19  
20  
21  
22  
23  
24  
25  
26  
27  
28  
29  
30  
31  
32  
33  
34  
35  
36  
37  
38  
39  
40  
41  
42  
43  
44  
45  
46  
47  
48  
49  
50  
51  
52  
53  
54  
55  
56  
57  
58  
59  
60

Firstly, I would like to thank for the deadline extension and for comments. We consider all consistent and we'll try to answer them below:

***Reviewer 1: Luís Marcelo Aranha Camargo***

***Professor, Medical Doctor, PhD***

***University of São Paulo***

***In head of the Rondônia Advanced Research Unit-Amazonia-Brazil***

1) "No statistical method described or used to detect statistical correlation between microfilaremia x ocular lesions." We are sorry for this mistake. Statistical analyzes were included in the text (highlighted).

2) "The sensitivity of the blood thick smear examination is not reliable. There maybe some patients with microfilaremia in the non affected group. They should better use the blood filtration with polycarbonate membrane plus microscopic examination with Giemsa stain and/or PCR for microfilaremia detection in all blood samples." We were really not clear in our methods section. In all patients thick smear, Knott and polycarbonate membrane filtration and PCR were performed by the co-author Marilaine Martins. This information was added to the text.

3) "It is not clear where the PCR was used." PCR was used to confirm if the species of microfilariae were *Mansonella ozzardi* in peripheral blood of all the patients.

4) The absence of a control group also affects the reliability of the study. We performed confocal microscopy in both eyes of all the 22 patients with keratitis. All of them had unilateral keratitis. We observed that the non affected fellow eye never showed alterations in the confocal microscopy.

5) "It's an original article and aims to produce more information about clinical manifestations of a high prevalent neglected Amazonian disease. Unfortunately the methodology is biased." This is mainly due to conditions of the work field. We visited several coastal communities (distant travel hours or days of each other), traveling by boat and examination of patients in such places were very difficult because they had to come aboard for this.

1  
2  
3 ***Reviewer 2: Dr Fatima Kyari***  
4 ***Research Degree Fellow***  
5 ***International Centre for Eye Health (ICEH),***  
6 ***London School of Hygiene and Tropical Medicine (LSHTM)***  
7 ***London, United Kingdom***  
8  
9

10  
11 I have no competing interests.

12  
13  
14 1) "The term "suspicious corneal lesions" frequently used needs to be described/defined." We call it  
15 "suspicious corneal lesions" the ones similar to those described in previous articles cited in our  
16 references. It is, basically, nummular keratitis. The description and this information were added to the  
17 revised text.  
18

19  
20  
21 2) "How did the investigators distinguish between corneal lesions due to M. ozzardi and those from  
22 other causes?" In the original text we wrote in the Results section "The clinical characteristics of the  
23 lesions as well as the high prevalence exclude the possibility of traumas and other known causes for  
24 the differential diagnosis, specifically Onchocercosis." and in the Discussion section "A comparison  
25 with other filarial diseases shows some similarities with onchocerciasis but there is no  
26 onchocerciasis in those parts of Brazil and also the clinical picture is different. Onchocerciasis has  
27 been excluded by the characteristics of the microfilaria tail and because it exists in Brazil only close to  
28 the Venezuela border. None of the patients lived or visited areas where Onchocerca exist." Besides  
29 this, until today, onchocercosis is limited to the region of the Yanomami Indians. (The Onchocerciasis  
30 Elimination Program Sauerbrey for the Americas (OEPA) M. Annals of Tropical Medicine & Parasitology,  
31 Vol 102, Supplement No. 1, S25-S29 (2008). This information was added to the text.  
32  
33  
34  
35  
36

37 3) "Tables 1, 2 and 3 showed associations between the presence of microfilaremia and corneal lesions  
38 assessed by the different examinations. However, no statistical tests were described to give the  
39 significance of association." Statistical analyzes were included in the text (highlighted).  
40  
41

42 4) "The standard of written English is acceptable. However, there are some minor corrections needed."  
43 We apologize. All suggested changes listed above were made in the review.  
44  
45  
46  
47

48  
49 page 6, line 11 ...in humans, M.ozzardi BEING one of them. The first description....  
50  
51

52  
53 page 7, line 11 .. al patients had THEIR eyes examined..  
54  
55  
56  
57  
58  
59  
60

1  
2  
3 page 7, line 25 ...patients with suspicious corneal lesions at the eye examination were SUBJECTED to  
4  
5 biomicroscopy..  
6  
7

8  
9  
10 page 7, line 29 THE CCME...  
11  
12

13  
14 page 10, line 42 use "prevalence", and not "prevalence rate"  
15  
16

17  
18 page 10, line 48 ...but there is NO onchocerciasis in THOSE parts of Brazil..  
19  
20

21  
22 page 11, line 6 ... onchocerca EXIST.  
23  
24

25  
26 page 12, line 34 ... eyes with no BIOMICROSCOPIC lesions..  
27  
28

29  
30  
31  
32  
33 5) "With the information provided and manuscript, I am not able to make a definite statement on  
34  
35 plagiarism, fabrication, and undeclared conflict of interests." A declaration of no competing interests  
36  
37 was made in Methods Section.  
38  
39

40  
41  
42 ***Reviewer 3: Thomas B. Nutman, MD***

43  
44 ***Head, Helminth Immunology Section***

45  
46 ***Laboratory of Parasitic Diseases***

47  
48 ***National Institute of Allergy and Infectious Diseases***

49  
50 ***National Institutes of Health***  
51  
52

53  
54  
55  
56 1) "What is actually missing here are data demonstrating the statistical validity of their findings. The  
57  
58  
59  
60

1  
2  
3 authors need to spell out the types of statistical methods they will perform and then actually perform  
4 them on their data. I actually performed statistics on the data presented in Tables 1-3; for only data in  
5  
6  
7  
8 Table 1 was their a statistically significant finding.” Statistical analyzes were included in the text  
9  
10 (highlighted).

11  
12 2) “Given that the authors are using PCR in corroborate their microscopy data, the details of this must  
13 be performed. Also, given that biopsies were performed in 2 patients, PCR should be applied to the  
14  
15  
16  
17  
18  
19  
20  
21  
22  
23  
24  
25  
26  
27  
28  
29  
30  
31  
32  
33  
34  
35  
36  
37  
38  
39  
40  
41  
42  
43  
44  
45  
46  
47  
48  
49  
50  
51  
52  
53  
54  
55  
56  
57  
58  
59  
60  
tissue in order to demonstrate definitively the relationship between the ocular disease and the presence  
of microfilariae in the eye proper.” The PCR was not applied to the ocular tissue because it was not  
available. It will be a part of our next study.

3) “A native English speaker should edit the manuscript to make the English a bit more colloquial and  
correct a few mistakes in syntax.” We revised it again including the suggestions made by one of the  
reviewers.

4) “As mentioned above, both the statistical validity of their findings and a definitive speciation of the  
ocular microfilariae would make this much more compelling, particularly because of number of the  
pictures of microfilariae (particularly the ones with the forked tail) are not characteristic of Mansonella  
ozzardi.”

Statistical analyzes were included in the text (highlighted). The ideal confirmation of the presence and  
what kind of microfilaria would be through corneal biopsy, but this is difficult, especially in the case of  
asymptomatic patients. This will be the subject of future studies. The intention of the article is to  
produce more evidence of the association between microfilaraemia by M. ozzardi and lion eye.

5) There is no statement about ethical approval nor about informed consent in the manuscript. The  
following statement was already in the Results, but now its in the Methods section: “The study was

1  
2  
3 prospective approved by the UNIFESP Ethical Committee. All participants signed the protocol's informed  
4  
5 consent."  
6  
7  
8  
9  
10

11  
12 We hope we're able to answer the comments. Thank you for them.  
13

14 At your disposal,  
15

16  
17  
18  
19  
20  
21   
22  
23

24  
25 Lucas Monferrari Monteiro Vianna, MD (Corresponding Author)  
26

27  
28 Department of Ophthalmology / Federal University of Sao Paulo, Sao Paulo, Brazil  
29

30  
31 Phone: 55-11-7493-8000

Fax: 55-11-5085-2010  
32

33 [lucasmuvianna@yahoo.com.br](mailto:lucasmuvianna@yahoo.com.br) <mailto:presidente@spdm.org.br>  
34  
35  
36  
37  
38  
39  
40  
41  
42  
43  
44  
45  
46  
47  
48  
49  
50  
51  
52  
53  
54  
55  
56  
57  
58  
59  
60



**Mansonella ozzardi corneal lesions in the Amazon: a cross-sectional study**

|                                 |                                                                                                                                                                                                                                                                                                                                                                                                               |
|---------------------------------|---------------------------------------------------------------------------------------------------------------------------------------------------------------------------------------------------------------------------------------------------------------------------------------------------------------------------------------------------------------------------------------------------------------|
| Journal:                        | <i>BMJ Open</i>                                                                                                                                                                                                                                                                                                                                                                                               |
| Manuscript ID:                  | bmjopen-2012-001266.R2                                                                                                                                                                                                                                                                                                                                                                                        |
| Article Type:                   | Research                                                                                                                                                                                                                                                                                                                                                                                                      |
| Date Submitted by the Author:   | 08-Oct-2012                                                                                                                                                                                                                                                                                                                                                                                                   |
| Complete List of Authors:       | Vianna, Lucas; UNIFESP, Ophthalmology<br>Martins, Marilaine; Fundação de Medicina Tropical do Amazonas, State University Amazonas, Parasithology<br>Cohen, Jacob; Federal University of Amazonas / Instituto de Oftalmologia de Manaus, Ophthalmology<br>Cohen, Marcos; Federal University of Amazonas / Instituto de Oftalmologia de Manaus, Ophthalmology<br>Belfort Junior, Rubens; UNIFESP, Ophthalmology |
| <b>Primary Subject Heading</b>: | Addiction                                                                                                                                                                                                                                                                                                                                                                                                     |
| Secondary Subject Heading:      | Ophthalmology                                                                                                                                                                                                                                                                                                                                                                                                 |
| Keywords:                       | OPHTHALMOLOGY, Corneal and external diseases < OPHTHALMOLOGY, PARASITOLOGY                                                                                                                                                                                                                                                                                                                                    |
|                                 |                                                                                                                                                                                                                                                                                                                                                                                                               |

SCHOLARONE™  
Manuscripts



## 1) TITLE PAGE:

**Mansonella ozzardi corneal lesions in the Amazon: a cross-sectional study**

**Authors:** Lucas Monferrari Monteiro Vianna (first author)\*; Marilaine Martins\*\*; Marcos Jacob Cohen\*\*\*, Jacob Cohen\*\*\*, Rubens Belfort Jr\*

\*Vision Institute and Department of Ophthalmology. Hospital São Paulo - Federal University of São Paulo. Address: Botucatu St, 821 – ZIP: 04023-900 – São Paulo/SP - Brazil

\*\* Fundação de Medicina Tropical do Amazonas, Universidade do Estado do Amazonas. Address: Pedro Teixeira Av., 25 - ZIP: 69040-000 - Manaus/AM - Brazil

\*\*\* Universidade Federal do Amazonas (UFAM) / Instituto de Oftalmologia de Manaus (IOM). Address: General Rodrigo Octávio Jordão Ramos Av, 3000, Campus Universitário, Coroado I - 69077-000 - Manaus/AM – Brazil

**Keywords:** Mansonella, microfilaria, keratitis, microscopy, confocal, biopsy



Lucas Monferrari Monteiro Vianna, MD (Corresponding Author)

Department of Ophthalmology / Federal University of Sao Paulo, Sao Paulo, Brazil

Phone: 55-11-7493-8000 - Fax: 55-11-5085-2010 ([lucasmvvianna@yahoo.com.br](mailto:lucasmvvianna@yahoo.com.br))

## **Mansonella ozzardi corneal lesions in the Amazon: a cross-sectional study**

### **2) ABSTRACT:**

**Objectives:** To characterize and confirm the presence of *Mansonella ozzardi* microfilariae in the cornea by biomicroscopy and corneal confocal microscopy.

**Design:** Cross-sectional study.

**Settings:** Clinical practice study in patients from communities of the rural area of Coari City in the Solimões River, Amazonas State, Brazil.

**Participants:** Two hundred and twelve consecutive volunteers patients that had their eyes examined using a flash light and had blood checked for the presence of microfilariae by expert microscopist. Patients with suspicious corneal lesions (characterized as nummular keratitis) at the eye exam were submitted to biomicroscopy, fundoscopy and corneal confocal microscopy (CCME) evaluation. Two patients underwent biopsy of the limbal conjunctiva adjacent to the nummular keratitis area and blood was collected from the surgical wound for microfilariae investigation by thick blood examination.

**Primary and secondary outcome measures:** Positive correlation between corneal biomicroscopic and confocal lesions with *M. ozzardi* microfilaremia.

**Results:** Of the 212 patients, 56 (26,4%) were positive for microfilaremia. By flash light examination, 22 patients that had nummular keratitis were sent to biomicroscopy and CCME. Corneal lesions were positive correlated to microfilaremia ( $P=0,0001$ ). At biomicroscopy, lesions were divided in quiescent and active. At CCME, they were

1  
2  
3 divided in circular and filiform lesions. The associations between corneal lesions, CCME  
4  
5 findings and microfilaremia are shown.  
6  
7

8 **Conclusions:** We presented some evidences of the presence of *M. ozzardi*  
9  
10 microfilariae in the cornea and its pathogenicity to the eye. Further studies using ocular  
11  
12 tissue PCR and other image techniques can be helpful.  
13  
14

15  
16 **Ethical Comitee Registration:** UNIFESP Ethical Committee (number 0767/10).  
17  
18

## 19 **ARTICLE SUMMARY**

### 20 **Article Focus**

- 21  
22  
23  
24  
25  
26 • To describe corneal lesions that can be related to the presence of *M. ozzardi*  
27 microfilaremia.  
28  
29
- 30  
31  
32 • To describe corneal confocal microscopy images that can be related to the  
33 presence of *M. ozzardi* microfilaremia.  
34  
35
- 36  
37 • To correlate ophthalmologic clinical signs with the presence of microfilaremia in  
38 some patients.  
39  
40  
41

### 42 **Key Messages**

- 43  
44  
45  
46 • There are some biomicroscopic and corneal confocal microscopy evidences of  
47 the presence of *M. ozzardi* microfilariae in the cornea.  
48  
49
- 50  
51 • The *M. ozzardi* microfilaria can be pathogenic to the eye.  
52
- 53  
54 • Further studies using ocular tissue PCR and other image techniques can be  
55 helpful.  
56  
57  
58  
59  
60

## Strengths and Limitations

- The major strength is that the study describes a very prevalent but not well studied disease in a very difficult access area of Brazil.
- Another strength is that this is the first description of *M. ozzardi* corneal lesions using confocal microscopy.
- The major limitation is the absence of a similar control group and follow up of the patients due to work field access difficulties.

## Statements:

**Data sharing statement:** there is no additional data available.

**Funding statement:** this work was supported by FAPESP (Fundação de Amparo à Pesquisa do Estado de São Paulo or Foundation for Research Support of São Paulo State).

**Competing Interests Statement:** we state that none of the authors have competing interests.

**Contributorship Statement:** we state that all authors contributed in the:

- 1) Conception and design of the study;
- 2) Acquisition, analysis and interpretation of data;
- 3) Drafting and revising of the article;
- 4) Final approval of the version to be published.

### 3) MAIN TEXT:

#### Introduction

Hundreds of types of filariae have been described and a few can cause infections in humans, *Mansonella ozzardi* being one of them. The first description of *M. ozzardi* associated with corneal disease was published in 1998.<sup>1</sup>

*M. ozzardi* is a filaria exclusively found in the America continent and one of the causes of mansonelliasis.<sup>2</sup> In Brazil it is found in the states of Roraima, Mato Grosso and Amazonas.<sup>3,4,5</sup> The microfilariae of *M. ozzardi* are found in peripheral blood and can be identified by their morphological characteristics or by molecular biology.<sup>6-11</sup>

The clinical features of mansonelliasis are not well described. Infected individuals are generally asymptomatic or have signs and symptoms common to other infections such as fever, coldness in the legs, joint pain and headache.<sup>12</sup> They may also include skin and ocular lesions<sup>1,13,14</sup> and be associated with *Wolbachiae*, that are bacterial endosymbionts of insects and many filarial nematodes and their products trigger inflammatory responses<sup>14</sup>.

Coari City, at Solimões River (04°08'S, 63°07'W) has a high prevalence of *M. ozzardi* infection. Studies showed average infection rate between 13.3% and 18.9%, with higher prevalence in rural areas and patient aging.<sup>2,14</sup> Other studies conducted in non-endemic areas shows no infection by *M. ozzardi*.<sup>15</sup> Onchocerciasis does not exist in this region of the Amazon.<sup>16</sup>

1  
2  
3 The objective of the present study is to characterize and confirm the presence of  
4  
5 *Mansonella ozzardi* microfilariae in the cornea and to show the positive correlation  
6  
7  
8 between corneal biomicroscopic and confocal lesions with *M. ozzardi* microfilaremia.  
9  
10

## 11 12 13 14 **Methods**

15  
16 Cross-sectional, clinical practice study of 212 consecutive volunteers patients from  
17  
18 communities of the rural area of Coari City in the Solimões River, Amazonas State,  
19  
20 Brazil, examined in August, 2010. All patients had their eyes examined using a flash  
21  
22 light and had blood checked for the presence of microfilariae by expert microscopist.  
23  
24 The peripheral blood infection by *M. ozzardi* was determined by light-microscopy  
25  
26 examination (200x and 400x) of Giemsa-stained thick smears of peripheral blood  
27  
28 obtained by digital puncture with a sterile disposable lancet<sup>6</sup>, Knott and polycarbonate  
29  
30 membrane filtration and by a new identification protocol using the polymerase chain  
31  
32 reaction (PCR) (M Martins et al., unpublished observations).  
33  
34  
35  
36

37  
38 Patients with nummular keratitis, similar to those previously described in the  
39  
40 literature<sup>1,13,14</sup> at the one or both eye examination were subjected to bilateral  
41  
42 biomicroscopy, fundoscopy and corneal confocal microscopy evaluation (CCME), using  
43  
44 the Rostock Cornea Module (RCM) of the Heidelberg Retina Tomograph. Photographs  
45  
46 were taken at the slit lamp. The CCME was performed in the central cornea of both  
47  
48 eyes and in the corneal regions with the nummular keratitis in the eyes they were  
49  
50 present.  
51  
52  
53  
54  
55  
56  
57  
58  
59  
60

1  
2  
3 Two patients underwent biopsy of the limbal conjunctiva adjacent to the nummular  
4 keratitis area and blood was collected from the surgical wound for microfilariae  
5 investigation by thick blood examination.  
6  
7  
8  
9

10 The inclusion criteria were being volunteer to *M. ozzardi* microfilaremia blood check and  
11 to sign the informed consent or have it signed by the legal responsible. The exclusion  
12 criteria were not being volunteer or able to sign the informed consent.  
13  
14

15 The study was prospective and approved by the UNIFESP Ethical Committee (number  
16 0767/10). All participants signed the protocol's informed consent.  
17  
18

19 Data were presented in contingency tables and Fisher exact test was used to compare  
20 proportions. P-values less than 0.05 were considered statistically significant. Analyses  
21 were done in Stata v.11 (College Station, Texas).  
22  
23  
24  
25  
26  
27  
28  
29  
30  
31

## 32 Results

33 Of the 212 patients, 56 (26,4%) were positive for microfilaremia. By flash light  
34 examination, 22 patients that had nummular keratitis were sent to biomicroscopy and  
35 CCME. Four of them had bilateral lesions. The association between microfilaremia and  
36 cornea lesions is shown in table 1, with statistically significant finding ( $p=0,0001$ ).  
37  
38  
39  
40  
41  
42

43 At biomicroscopy, some lesions were characterized as nummular, mid periphery and  
44 anterior stromal corneal opacities, 0.5 to 1.0 mm in diameter with central mottled  
45 surrounded by a opaque halo, with marked limit between the white opacity and the clear  
46 cornea. Other lesions were characterized by nummular keratitis, also located at mid  
47 periphery and anterior stromal .In all cases there was a normal translucent area  
48 between the corneal lesions and the limbus and absence of corneal neovascularization  
49  
50  
51  
52  
53  
54  
55  
56  
57  
58  
59  
60

1  
2  
3 or other changes (Picture 1). The clinical characteristics of the lesions as well as the  
4  
5 high prevalence exclude the possibility of traumas and other known causes for  
6  
7 the differential diagnosis, specifically Onchocercosis. The association between  
8  
9 nummular keratitis and microfilaremia is shown in table 2 ( $p=0.1347$ ).  
10  
11

12 Among the 22 patients with corneal lesions at biomicroscopy, 12 presented suspected  
13  
14 related lesions also at the CCME. These confocal suspected lesions were presented in  
15  
16 two patterns: circular (increased reflectivity, measuring about 80 micra in diameter,  
17  
18 located at the sub-epithelial level, as shown in picture 2) and linear (filiform lesions  
19  
20 ranging from 250 to 300  $\mu\text{m}$  in length and 10 to 15  $\mu\text{m}$  wide, with one "C" shape end  
21  
22 and the other tapered, as shown in picture 3). Five patients presented only circular  
23  
24 lesions, one patient only linear lesions and six patients had both of them. The  
25  
26 association between confocal lesions and microfilaremia is shown in table 3 ( $p=0.4266$ ).  
27  
28 In two volunteers patients with linear lesions, thick blood smear of the limbal conjunctiva  
29  
30 was performed and confirmed the microfilaremia. Picture 4 compares microfilaria of *M.*  
31  
32 *ozzardi* seen at the thick blood smear with the confocal microscopy image.  
33  
34  
35  
36  
37

38 Acknowledgement for Funding/Support to FAPESP (Fundação de Amparo à Pesquisa  
39  
40 do Estado de São Paulo or Foundation for Research Support of São Paulo State) and  
41  
42 for technical support for *Mansonella*-Brazil Group (Belfort Jr RB, Borborema M, Cohen  
43  
44 J, Cohen MJ, Cunha P, Fontes G, Martins M, Medeiros JF, Pessoa, FAC, Vianna LMM,  
45  
46 Zanelato T).  
47  
48  
49  
50  
51  
52  
53  
54  
55  
56  
57  
58  
59  
60



## Discussion

The prevalence of *M. ozzardi* is high in some riverside communities in Amazon with the increasing occupation of rainforest areas.<sup>2,16</sup> Previous studies in Coari city showed an average infection rate between 13.3% and 18.9%, with higher prevalence in rural areas and patient aging.<sup>2,14</sup> Other studies conducted in non-endemic areas shows no infection by *M. ozzardi*.<sup>15</sup> In the present study, the prevalence was of 26,4%.

Presumed keratitis caused by *M. ozzardi* has been described in Brazil by us as well as other authors, with no other defined etiology related.<sup>1,13,14</sup> A comparison with other filarial diseases shows some similarities with onchocerciasis but there is no onchocerciasis in those parts of Brazil and also the clinical picture is different. Onchocerciasis has been excluded by the characteristics of the microfilaria tail and because it exists in Brazil only close to the Venezuela border, in the Yanomami Indian Reservation.<sup>17,18</sup> None of the patients lived or visited areas where *Onchocerca* exist.

A study conducted in Pauini, at the Purus River revealed 20 non-Indian habitants with peripheral corneal opacities among 524 patients examined. No microfilariae were seen in the skin snips and *Mansonella sp* was found in the blood of the 2 patients where it was possible to collect blood.<sup>1</sup> Another study, conducted in São Gabriel da Cachoeira (Negro River) showed a positive association between *M. ozzardi* and corneal lesions with all patients presenting ocular changes having *M. ozzardi* microfilariae in blood samples.<sup>13</sup> All the skin biopsies were negative for microfilaria including *Onchocerca*.

The association between the keratitis and positive microfilaremia in the Amazon was also related by Cohen et al.<sup>14</sup> In our study, this association was also found, with statistically significant finding, as shown in table 1 (p=0,0001).

1  
2  
3 The aspect of corneal lesions was divided by its characteristics in only corneal opacities  
4 and keratitis, as shown in picture 1. Among patients positive for microfilaremia, the  
5 proportion of keratitis aspect seems to be higher and among patients negative for  
6 microfilaria, the proportion of only opacity aspect was higher, although there was no  
7 statistical significance (table 2,  $p=0,1347$ ). One explanation for the presence of patients  
8 with keratitis lesion and negative microfilaremia could be false negatives in the blood  
9 tests. Patients with only opacity lesion and positive microfilaremia could be explained by  
10 chronic infection.  
11

12 Like in previous studies,<sup>1,13,14</sup> we could not detect, by biomicroscopy, filariae in any  
13 ocular tissue, but corneal lesions similar to previous descriptions were found. Using  
14 CCME, we detected not previously described lesions. Among patients positive for  
15 microfilaremia, the proportion of confocal lesions was higher (table 3,  $p=0,4266$ ). The  
16 confocal lesions were divided by their aspects in linear and circular. Among patients  
17 with lesions identified by CCME, there were a higher proportion of patients positive for  
18 microfilaremia and a higher proportion of circular aspect alone among patients negative  
19 for microfilaremia, although there was no statistical significance (table 3,  $p=0,4266$ ). It  
20 could suggest that linear lesions are associated with active disease and circular lesions  
21 with inflammatory scars, associated or not with active disease. The size of linear lesions  
22 (250-300 microns) on CCME was higher than showed in microbiological studies (149-  
23 240 microns)<sup>6</sup>. The microfilariae are probably dead in ocular tissues and could enlarge  
24 due to inflammatory reaction. Circular lesions could represent, besides inflammatory  
25 reaction surrounding dead microfilariae, cross section of remnants of adult worms (26 to  
26 49 mm in length by 0.07 to 0.15 mm in diameter)<sup>6</sup>.  
27  
28  
29  
30  
31  
32  
33  
34  
35  
36  
37  
38  
39  
40  
41  
42  
43  
44  
45  
46  
47  
48  
49  
50  
51  
52  
53  
54  
55  
56  
57  
58  
59  
60

1  
2  
3 Unaffected patients were not tested due to difficulties of fieldwork. We performed  
4  
5 confocal microscopy in both eyes of all the 22 patients with keratitis. In the 18 with  
6  
7  
8 unilateral keratitis, the non affected fellow eye never showed alterations in the confocal  
9  
10  
11 microscopy.

12  
13 New molecular biology techniques for *M ozzardi* has been used<sup>6-11</sup> and can be helpful  
14  
15 in future studies of ocular tissues PCR, helping to confirm the association between  
16  
17  
18 microfilaremia and ocular lesions.  
19

## 20 21 22 **Conclusion**

23  
24 We presented some evidences of the presence of *M. ozzardi* microfilariae in the cornea  
25  
26  
27 and its pathogenicity to the eye. Further studies using ocular tissue PCR and other  
28  
29  
30 image techniques can be helpful.  
31  
32  
33  
34  
35  
36  
37  
38  
39  
40  
41  
42  
43  
44  
45  
46  
47  
48  
49  
50  
51  
52  
53  
54  
55  
56  
57  
58  
59  
60

#### 4) Tables:

Table 1. Association between corneal lesions and microfilaremia (detected by any of the diagnose methods: Giemsa staining, Knott and polycarbonate membrane filtration and/or PCR).

| <b>Corneal Lesions (horizontal)</b> | <b>Presence<br/>(+)</b> | <b>Absence<br/>(-)</b> | <b>Total</b> |
|-------------------------------------|-------------------------|------------------------|--------------|
| <b>Microfilaremia (vertical)</b>    |                         |                        |              |
| <b>Positive (+)</b>                 | 14 (63,6%)              | 42 (22%)               | 56           |
| <b>Negative (-)</b>                 | 8 (33,4%)               | 148 (88%)              | 156          |
| <b>Total</b>                        | 22                      | 190                    | 212 (100%)   |

p-value: 0.0001

Table 2. Association between nummular keratitis and microfilaremia (detected by any of the diagnose methods: Giemsa staining, Knott and polycarbonate membrane filtration and/or PCR).

| <b>Keratitis lesions (horizontal)</b> | <b>Presence<br/>(+)</b> | <b>Absence<br/>(-)</b> | <b>Total</b> |
|---------------------------------------|-------------------------|------------------------|--------------|
| <b>Microfilaremia (vertical)</b>      |                         |                        |              |
| <b>Positive (+)</b>                   | 10 (76,9%)              | 4 (44%)                | 14           |
| <b>Negative (-)</b>                   | 3 (23,1%)               | 5 (56%)                | 8            |
| <b>Total</b>                          | 13                      | 9                      | 22 (100%)    |

p-value: 0.1347

Table 3. Association between confocal lesions and microfilaremia (detected by any of the diagnose methods: Giemsa staining, Knott and polycarbonate membrane filtration and/or PCR).

| <b>Confocal lesion (horizontal)</b> | <b>Presence (+)</b>               | <b>Absence</b> | <b>Total</b> |
|-------------------------------------|-----------------------------------|----------------|--------------|
| <b>Microfilaremia (vertical)</b>    | <b>% Circular / Linear / Both</b> | <b>(-)</b>     |              |
| <b>Positive (+)</b>                 | 2 (25%) / 1 (12,5%) / 5 (62,5%)   | 6              | 14           |
| <b>Negative (-)</b>                 | 3 (75%) / 0 / 1 (25%)             | 4              | 8            |
|                                     | 12                                | 10             | 22           |

p-value: 0.4266

## 5) ACKNOWLEDGMENTS, COMPETING INTERESTS, FUNDING:

**Acknowledgments:** *Mansonella-Brazil Group:* Belfort Jr RB, Borborema M, Cohen J, Cohen MJ, Cunha P, Fontes G, Martins M, Medeiros JF, Pessoa, FAC, Vianna LMM, Zanelato T

**Competing Interests Statement:** We state that none of the authors have competing interests.

**Funding/Support:** FAPESP (Fundação de Amparo à Pesquisa do Estado de São Paulo or Foundation for Research Support of São Paulo State).

**Contributorship Statement:** We state that all authors contributed in the:

- 1) Conception and design of the study;
- 2) Acquisition, analysis and interpretation of data;
- 3) Drafting and revising of the article;
- 4) Final approval of the version to be published.

**6) REFERENCE LIST:**

1. Branco BC, Chamon W, Belfort R et al. Ocular findings in Pauini (Southwest of the Brazilian Amazon) and possible corneal lesions caused by Mansonella. *Arq Bras Oftalmol.* 1998; Vol 61(6): 647-82.
2. Martins M, Pessoa FA, de Medeiros MB, et al. Mansonella ozzardi in Amazonas, Brazil: prevalence and distribution in the municipality of Coari, in the middle Solimões River. *Mem Inst Oswaldo Cruz.* 2010 May;105(3):246-53.
3. Deane MP. Sobre a incidência de filárias humanas em Manaus, estado do Amazonas. *Rev Serv Esp Saude Publ* 1949 2: 849-858.
4. Oliveira wr. [Filarial infestation in inhabitants of Vila Pereira, territory of Roraima (Brazil)]. *Rev Inst Med Trop Sao Paulo.* 1963 Nov-Dec;5:287-8.
5. D'Andretta Jr, Pio da Silva CM, Kameyana F. Ocorrência da mansonelose entre índios do alto Xingu. *Rev Soc Bras Med Trop* 1969. 3:11.
6. Orihel TC, Eberhard ML. Mansonella ozzardi: a redescription with comments on its taxonomic relationships. *Am J Trop Med Hyg.* 1982 Nov;31(6):1142-7.
7. Morales-Hojas R, Post RJ, Shelley AJ, et al. Characterisation of nuclear ribosomal DNA sequences from *Onchocerca volvulus* and *Mansonella ozzardi* (Nematoda: Filarioidea) and development of a PCR-based method for their

1  
2  
3 detection in skin biopsies. *Int J Parasitol*. 2001 Feb;31(2):169-77. Erratum in: *Int*  
4  
5 *J Parasitol* 2001 Jun;31(8):850-1  
6  
7

- 8  
9  
10 8. Vera LJ, Basano S de A, Camargo J de S, et al. Improvement of a PCR test to  
11  
12 diagnose infection by *Mansonella ozzardi*. *Rev Soc Bras Med Trop*. 2011 May-  
13  
14 Jun;44(3):380-2.  
15  
16  
17  
18  
19  
20 9. Tang TH, López-Vélez R, Lanza M, et al. Nested PCR to detect and distinguish  
21  
22 the sympatric filarial species *Onchocerca volvulus*, *Mansonella ozzardi* and  
23  
24 *Mansonella perstans* in the Amazon Region. *Mem Inst Oswaldo Cruz*. 2010  
25  
26 Sep;105(6):823-8.  
27  
28  
29  
30  
31  
32 10. Degese MF, Cabrera MG, Krivokapich SJ, et al. Contribution of the PCR assay to  
33  
34 the diagnosis of *Mansonella ozzardi* in endemic areas of Argentina. *Rev Argent*  
35  
36 *Microbiol*. 2012 Apr-Jun;44(2):97-100. Spanish. Genetic  
37  
38  
39  
40  
41 11. Marcos LA, Arrospide N, Recuenco S, et al. Genetic Characterization of Atypical  
42  
43 *Mansonella* (*Mansonella*) *ozzardi* *Microfilariae* in Human Blood Samples from  
44  
45 Northeastern Peru. *Am J Trop Med Hyg*. 2012 Sep;87(3):491-4. Epub 2012 Jul  
46  
47 23.  
48  
49  
50  
51  
52  
53  
54  
55  
56  
57  
58  
59  
60



- 1  
2  
3 12. BATISTA D, CERQUEIRA NL, MORAES MA. [Epidemiology of Manson's  
4 disease in a locality in the interior of Amazonas]. Rev Assoc Med Bras. 1960  
5 Jun;6:176-84.  
6  
7  
8  
9  
10
- 11  
12  
13 13. Garrido C, Campos M. First report of presumed parasitic keratitis in Indians from  
14 the Brazilian Amazon. Cornea. 2000 Nov;19(6):817-9.  
15  
16  
17  
18  
19
- 20  
21  
22 14. Cohen JM, Ribeiro JA, Martins M. Ocular manifestations in mansonelliasis. Arq  
23 Bras Oftalmol. 2008 Mar-Apr;71(2):167-71. Portuguese.  
24  
25  
26  
27  
28
- 29 15. Basano S de A, Camargo J de S, Vera LJ, Velasques SN, et al. Investigation of  
30 the occurrence of Mansonella ozzardi in the State of Rondônia, Western  
31 Amazonia, Brazil. Rev Soc Bras Med Trop. 2011 Oct;44(5):600-3. Epub 2011  
32 Aug 26.  
33  
34  
35  
36  
37  
38  
39
- 40 16. Medeiros JF, Py-Daniel V, Barbosa UC, et al. [Occurrence of Mansonella ozzardi  
41 (Nematoda, Onchocercidae) in riverine communities of the Purus river, Boca do  
42 Acre municipality, Amazonas State, Brazil]. Cad Saude Publica. 2009  
43 Jun;25(6):1421-6.  
44  
45  
46  
47  
48  
49  
50
- 51  
52  
53 17. Belfort Jr, R e Moraes, M – Oncocercose ocular no Brasil. AMB Rev Assoc Med  
54 Bras. 1979 Apr;25(4):123-7.  
55  
56  
57  
58  
59  
60

- 1  
2  
3  
4  
5  
6  
7  
8  
9  
10  
11  
12  
13  
14  
15  
16  
17  
18  
19  
20  
21  
22  
23  
24  
25  
26  
27  
28  
29  
30  
31  
32  
33  
34  
35  
36  
37  
38  
39  
40  
41  
42  
43  
44  
45  
46  
47  
48  
49  
50  
51  
52  
53  
54  
55  
56  
57  
58  
59  
60
18. The Onchocerciasis Elimination Program Sauerbrey for the Americas (OEPA) M. Annals of Tropical Medicine & Parasitology, Vol 102, Supplement No. 1 , S25-S29 (2008).

For peer review only

## 7) FIGURE LEGENDS:

**Picture 1.** Clinical features. (Left and bottom) Central irregular “mottled” surrounded by a opaque halo opacitie; (Right) Four typical keratitis lesions. All of them had normal translucent area between the lesions and the limbus, without the presence of corneal neovascularization.

**Picture 2.** Five different patterns of circular lesions measuring about 80  $\mu\text{m}$  in diameter, located sub-epithelial, in different patients. The figures are 400  $\mu\text{m}$  x 400  $\mu\text{m}$ .

**Picture 3.** Filiform lesions located above the epithelium basal layer about 300  $\mu\text{m}$  long and 10  $\mu\text{m}$  wide, with one dichotomized end into a "C" shape and the other tapered, all in the same patient, who had limbal conjunctiva thick blood smear positive for *Mansonella ozzardi*. The figures are 400  $\mu\text{m}$  x 400  $\mu\text{m}$ .

**Picture 4.** Microfilaria as detected by thick blood smear and corneal confocal image from a patient who had both tests performed.

## 1) TITLE PAGE:

**Mansonella ozzardi corneal lesions in the Amazon: a cross-sectional study**

**Authors:** Lucas Monferrari Monteiro Vianna (first author)\*; Marilaine Martins\*\*; Marcos Jacob Cohen\*\*\*, Jacob Cohen\*\*\*, Rubens Belfort Jr\*

\*Vision Institute and Department of Ophthalmology. Hospital São Paulo - Federal University of São Paulo. Address: Botucatu St, 821 – ZIP: 04023-900 – São Paulo/SP - Brazil

\*\* Fundação de Medicina Tropical do Amazonas, Universidade do Estado do Amazonas. Address: Pedro Teixeira Av., 25 - ZIP: 69040-000 - Manaus/AM - Brazil

\*\*\* Universidade Federal do Amazonas (UFAM) / Instituto de Oftalmologia de Manaus (IOM). Address: General Rodrigo Octávio Jordão Ramos Av, 3000, Campus Universitário, Coroado I - 69077-000 - Manaus/AM – Brazil

**Keywords:** Mansonella, microfilaria, keratitis, microscopy, confocal, biopsy



Lucas Monferrari Monteiro Vianna, MD (Corresponding Author)

Department of Ophthalmology / Federal University of Sao Paulo, Sao Paulo, Brazil

Phone: 55-11-7493-8000 - Fax: 55-11-5085-2010 ([lucasmvianna@yahoo.com.br](mailto:lucasmvianna@yahoo.com.br))

## **Mansonella ozzardi corneal lesions in the Amazon: a cross-sectional study**

### **2) ABSTRACT:**

**Objectives:** To characterize and confirm the presence of *Mansonella ozzardi* microfilariae in the cornea by biomicroscopy and corneal confocal microscopy.

**Design:** Cross-sectional study.

**Settings:** Clinical practice study in patients from communities of the rural area of Coari City in the Solimões River, Amazonas State, Brazil.

**Participants:** Two hundred and twelve consecutive volunteers patients that had their eyes examined using a flash light and had blood checked for the presence of microfilariae by expert microscopist. Patients with suspicious corneal lesions (characterized as nummular keratitis) at the eye exam were submitted to biomicroscopy, fundoscopy and corneal confocal microscopy (CCME) evaluation. Two patients underwent biopsy of the limbal conjunctiva adjacent to the nummular keratitis area and blood was collected from the surgical wound for microfilariae investigation by thick blood examination.

**Primary and secondary outcome measures:** Positive correlation between corneal biomicroscopic and confocal lesions with *M. ozzardi* microfilaremia.

**Results:** Of the 212 patients, 56 (26,4%) were positive for microfilaremia. By flash light examination, 22 patients that had nummular keratitis were sent to biomicroscopy and CCME. Corneal lesions were positive correlated to microfilaremia ( $P=0,0001$ ). At biomicroscopy, lesions were divided in quiescent and active. At CCME, they were

1  
2  
3 divided in circular and filiform lesions. The associations between corneal lesions, CCME  
4  
5 findings and microfilaremia are shown.  
6  
7

8 **Conclusions:** We presented some evidences of the presence of *M. ozzardi*  
9  
10 microfilariae in the cornea and its pathogenicity to the eye. Further studies using ocular  
11  
12 tissue PCR and other image techniques can be helpful.  
13  
14

15  
16 **Ethical Comitee Registration:** UNIFESP Ethical Committee (number 0767/10).  
17  
18

## 19 **ARTICLE SUMMARY**

### 20 **Article Focus**

- 21  
22  
23  
24  
25  
26 • To describe corneal lesions that can be related to the presence of *M. ozzardi*  
27 microfilaremia.  
28  
29
- 30  
31  
32 • To describe corneal confocal microscopy images that can be related to the  
33 presence of *M. ozzardi* microfilaremia.  
34  
35
- 36  
37  
38 • To correlate ophthalmologic clinical signs with the presence of microfilaremia in  
39 some patients.  
40  
41

### 42 **Key Messages**

- 43  
44  
45  
46 • There are some biomicroscopic and corneal confocal microscopy evidences of  
47 the presence of *M. ozzardi* microfilariae in the cornea.  
48  
49
- 50  
51  
52 • The *M. ozzardi* microfilaria can be pathogenic to the eye.  
53  
54
- 55  
56  
57 • Further studies using ocular tissue PCR and other image techniques can be  
58 helpful.  
59  
60

## Strengths and Limitations

- The major strength is that the study describes a very prevalent but not well studied disease in a very difficult access area of Brazil.
- Another strength is that this is the first description of *M. ozzardi* corneal lesions using confocal microscopy.
- The major limitation is the absence of a similar control group and follow up of the patients due to work field access difficulties.

## Statements:

**Data sharing statement:** there is no additional data available.

**Funding statement:** this work was supported by FAPESP (Fundação de Amparo à Pesquisa do Estado de São Paulo or Foundation for Research Support of São Paulo State).

**Competing Interests Statement:** we state that none of the authors have competing interests.

**Contributorship Statement:** we state that all authors contributed in the:

- 1) Conception and design of the study;
- 2) Acquisition, analysis and interpretation of data;
- 3) Drafting and revising of the article;
- 4) Final approval of the version to be published.

### 3) MAIN TEXT:

#### Introduction

Hundreds of types of filariae have been described and a few can cause infections in humans, *Mansonella ozzardi* being one of them. The first description of *M. ozzardi* associated with corneal disease was published in 1998.<sup>1</sup>

*M. ozzardi* is a filaria exclusively found in the America continent and one of the causes of mansonelliasis.<sup>2</sup> In Brazil it is found in the states of Roraima, Mato Grosso and Amazonas.<sup>3,4,5</sup> The microfilariae of *M. ozzardi* are found in peripheral blood and can be identified by their morphological characteristics or by molecular biology.<sup>6-11</sup>

The clinical features of mansonelliasis are not well described. Infected individuals are generally asymptomatic or have signs and symptoms common to other infections such as fever, coldness in the legs, joint pain and headache.<sup>12</sup> They may also include skin and ocular lesions<sup>1,13,14</sup> and be associated with *Wolbachiae*, that are bacterial endosymbionts of insects and many filarial nematodes and their products trigger inflammatory responses<sup>14</sup>.

Coari City, at Solimões River (04°08'S, 63°07'W) has a high prevalence of *M. ozzardi* infection. Studies showed average infection rate between 13.3% and 18.9%, with higher prevalence in rural areas and patient aging.<sup>2,14</sup> Other studies conducted in non-endemic areas shows no infection by *M. ozzardi*.<sup>15</sup> Onchocerciasis does not exist in this region of the Amazon.<sup>16</sup>



1  
2  
3 The objective of the present study is to characterize and confirm the presence of  
4  
5 *Mansonella ozzardi* microfilariae in the cornea and to show the positive correlation  
6  
7  
8 between corneal biomicroscopic and confocal lesions with *M. ozzardi* microfilaremia.  
9  
10

## 11 12 13 14 **Methods**

15  
16 Cross-sectional, clinical practice study of 212 consecutive volunteers patients from  
17  
18 communities of the rural area of Coari City in the Solimões River, Amazonas State,  
19  
20 Brazil, examined in August, 2010. All patients had their eyes examined using a flash  
21  
22 light and had blood checked for the presence of microfilariae by expert microscopist.  
23  
24 The peripheral blood infection by *M. ozzardi* was determined by light-microscopy  
25  
26 examination (200x and 400x) of Giemsa-stained thick smears of peripheral blood  
27  
28 obtained by digital puncture with a sterile disposable lancet<sup>6</sup>, Knott and polycarbonate  
29  
30 membrane filtration and by a new identification protocol using the polymerase chain  
31  
32 reaction (PCR) (M Martins et al., unpublished observations).  
33  
34  
35  
36

37  
38 Patients with nummular keratitis, similar to those previously described in the  
39  
40 literature<sup>1,13,14</sup> at the one or both eye examination were subjected to bilateral  
41  
42 biomicroscopy, fundoscopy and corneal confocal microscopy evaluation (CCME), using  
43  
44 the Rostock Cornea Module (RCM) of the Heidelberg Retina Tomograph. Photographs  
45  
46 were taken at the slit lamp. The CCME was performed in the central cornea of both  
47  
48 eyes and in the corneal regions with the nummular keratitis in the eyes they were  
49  
50 present.  
51  
52  
53  
54  
55  
56  
57  
58  
59  
60

1  
2  
3 Two patients underwent biopsy of the limbal conjunctiva adjacent to the nummular  
4 keratitis area and blood was collected from the surgical wound for microfilariae  
5 investigation by thick blood examination.  
6  
7  
8  
9

10 The inclusion criteria were being volunteer to *M. ozzardi* microfilaremia blood check and  
11 to sign the informed consent or have it signed by the legal responsible. The exclusion  
12 criteria were not being volunteer or able to sign the informed consent.  
13  
14  
15  
16

17 The study was prospective and approved by the UNIFESP Ethical Committee (number  
18 0767/10). All participants signed the protocol's informed consent.  
19  
20  
21

22 Data were presented in contingency tables and Fisher exact test was used to compare  
23 proportions. P-values less than 0.05 were considered statistically significant. Analyses  
24 were done in Stata v.11 (College Station, Texas).  
25  
26  
27  
28  
29  
30  
31

## 32 Results

33  
34 Of the 212 patients, 56 (26,4%) were positive for microfilaremia. By flash light  
35 examination, 22 patients that had nummular keratitis were sent to biomicroscopy and  
36 CCME. Four of them had bilateral lesions. The association between microfilaremia and  
37 cornea lesions is shown in table 1, with statistically significant finding ( $p=0,0001$ ).  
38  
39  
40  
41  
42

43 At biomicroscopy, some lesions were characterized as nummular, mid periphery and  
44 anterior stromal corneal opacities, 0.5 to 1.0 mm in diameter with central mottled  
45 surrounded by a opaque halo, with marked limit between the white opacity and the clear  
46 cornea. Other lesions were characterized by nummular keratitis, also located at mid  
47 periphery and anterior stromal .In all cases there was a normal translucent area  
48 between the corneal lesions and the limbus and absence of corneal neovascularization  
49  
50  
51  
52  
53  
54  
55  
56  
57  
58  
59  
60

1  
2  
3 or other changes (Picture 1). The clinical characteristics of the lesions as well as the  
4  
5 high prevalence exclude the possibility of traumas and other known causes for  
6  
7 the differential diagnosis, specifically Onchocercosis. The association between  
8  
9 nummular keratitis and microfilaremia is shown in table 2 (p=0.1347).  
10  
11

12 Among the 22 patients with corneal lesions at biomicroscopy, 12 presented suspected  
13  
14 related lesions also at the CCME. These confocal suspected lesions were presented in  
15  
16 two patterns: circular (increased reflectivity, measuring about 80 micra in diameter,  
17  
18 located at the sub-epithelial level, as shown in picture 2) and linear (filiform lesions  
19  
20 ranging from 250 to 300 µm in length and 10 to 15 µm wide, with one "C" shape end  
21  
22 and the other tapered, as shown in picture 3). Five patients presented only circular  
23  
24 lesions, one patient only linear lesions and six patients had both of them. The  
25  
26 association between confocal lesions and microfilaremia is shown in table 3 (p=0.4266).  
27  
28 In two volunteers patients with linear lesions, thick blood smear of the limbal conjunctiva  
29  
30 was performed and confirmed the microfilaremia. Picture 4 compares microfilaria of *M.*  
31  
32 *ozzardi* seen at the thick blood smear with the confocal microscopy image.  
33  
34  
35  
36  
37

38 Acknowledgement for Funding/Support to FAPESP (Fundação de Amparo à Pesquisa  
39  
40 do Estado de São Paulo or Foundation for Research Support of São Paulo State) and  
41  
42 for technical support for *Mansonella*-Brazil Group (Belfort Jr RB, Borborema M, Cohen  
43  
44 J, Cohen MJ, Cunha P, Fontes G, Martins M, Medeiros JF, Pessoa, FAC, Vianna LMM,  
45  
46 Zanelato T).  
47  
48  
49  
50  
51  
52  
53  
54  
55  
56  
57  
58  
59  
60

## Discussion

The prevalence of *M. ozzardi* is high in some riverside communities in Amazon with the increasing occupation of rainforest areas.<sup>2,16</sup> Previous studies in Coari city showed an average infection rate between 13.3% and 18.9%, with higher prevalence in rural areas and patient aging.<sup>2,14</sup> Other studies conducted in non-endemic areas shows no infection by *M. ozzardi*.<sup>15</sup> In the present study, the prevalence was of 26,4%.

Presumed keratitis caused by *M. ozzardi* has been described in Brazil by us as well as other authors, with no other defined etiology related.<sup>1,13,14</sup> A comparison with other filarial diseases shows some similarities with onchocerciasis but there is no onchocerciasis in those parts of Brazil and also the clinical picture is different. Onchocerciasis has been excluded by the characteristics of the microfilaria tail and because it exists in Brazil only close to the Venezuela border, in the Yanomami Indian Reservation.<sup>17,18</sup> None of the patients lived or visited areas where *Onchocerca* exist.

A study conducted in Pauini, at the Purus River revealed 20 non-Indian habitants with peripheral corneal opacities among 524 patients examined. No microfilariae were seen in the skin snips and *Mansonella sp* was found in the blood of the 2 patients where it was possible to collect blood.<sup>1</sup> Another study, conducted in São Gabriel da Cachoeira (Negro River) showed a positive association between *M. ozzardi* and corneal lesions with all patients presenting ocular changes having *M. ozzardi* microfilariae in blood samples.<sup>13</sup> All the skin biopsies were negative for microfilaria including *Onchocerca*. The association between the keratitis and positive microfilaremia in the Amazon was also related by Cohen et al.<sup>14</sup> In our study, this association was also found, with statistically significant finding, as shown in table 1 ( $p=0,0001$ ).

1  
2  
3 The aspect of corneal lesions was divided by its characteristics in only corneal opacities  
4 and keratitis, as shown in picture 1. Among patients positive for microfilariaemia, the  
5 proportion of keratitis aspect seems to be higher and among patients negative for  
6 microfilaria, the proportion of only opacity aspect was higher, although there was no  
7 statistical significance (table 2,  $p=0,1347$ ). One explanation for the presence of patients  
8 with keratitis lesion and negative microfilariaemia could be false negatives in the blood  
9 tests. Patients with only opacity lesion and positive microfilariaemia could be explained by  
10 chronic infection.  
11

12 Like in previous studies,<sup>1,13,14</sup> we could not detect, by biomicroscopy, filariae in any  
13 ocular tissue, but corneal lesions similar to previous descriptions were found. Using  
14 CCME, we detected not previously described lesions. Among patients positive for  
15 microfilariaemia, the proportion of confocal lesions was higher (table 3,  $p=0,4266$ ). The  
16 confocal lesions were divided by their aspects in linear and circular. Among patients  
17 with lesions identified by CCME, there were a higher proportion of patients positive for  
18 microfilariaemia and a higher proportion of circular aspect alone among patients negative  
19 for microfilariaemia, although there was no statistical significance (table 3,  $p=0,4266$ ). It  
20 could suggest that linear lesions are associated with active disease and circular lesions  
21 with inflammatory scars, associated or not with active disease. The size of linear lesions  
22 (250-300 microns) on CCME was higher than showed in microbiological studies (149-  
23 240 microns)<sup>6</sup>. The microfilariae are probably dead in ocular tissues and could enlarge  
24 due to inflammatory reaction. Circular lesions could represent, besides inflammatory  
25 reaction surrounding dead microfilariae, cross section of remnants of adult worms (26 to  
26 49 mm in length by 0.07 to 0.15 mm in diameter)<sup>6</sup>.  
27  
28  
29  
30  
31  
32  
33  
34  
35  
36  
37  
38  
39  
40  
41  
42  
43  
44  
45  
46  
47  
48  
49  
50  
51  
52  
53  
54  
55  
56  
57  
58  
59  
60

1  
2  
3 Unaffected patients were not tested due to difficulties of fieldwork. We performed  
4  
5 confocal microscopy in both eyes of all the 22 patients with keratitis. In the 18 with  
6  
7  
8 unilateral keratitis, the non affected fellow eye never showed alterations in the confocal  
9  
10  
11 microscopy.

12  
13 New molecular biology techniques for *M ozzardi* has been used<sup>6-11</sup> and can be helpful  
14  
15 in future studies of ocular tissues PCR, helping to confirm the association between  
16  
17  
18 microfilaremia and ocular lesions.  
19

## 20 21 22 **Conclusion**

23  
24 We presented some evidences of the presence of *M. ozzardi* microfilariae in the cornea  
25  
26  
27 and its pathogenicity to the eye. Further studies using ocular tissue PCR and other  
28  
29  
30 image techniques can be helpful.  
31  
32  
33  
34  
35  
36  
37  
38  
39  
40  
41  
42  
43  
44  
45  
46  
47  
48  
49  
50  
51  
52  
53  
54  
55  
56  
57  
58  
59  
60

## 4) Tables:

Table 1. Association between corneal lesions and microfilaremia (detected by any of the diagnose methods: Giemsa staining, Knott and polycarbonate membrane filtration and/or PCR).

| Corneal Lesions (horizontal)     | Presence<br>(+) | Absence<br>(-) | Total      |
|----------------------------------|-----------------|----------------|------------|
| <b>Microfilaremia (vertical)</b> |                 |                |            |
| <b>Positive (+)</b>              | 14 (63,6%)      | 42 (22%)       | 56         |
| <b>Negative (-)</b>              | 8 (33,4%)       | 148 (88%)      | 156        |
| <b>Total</b>                     | 22              | 190            | 212 (100%) |

p-value: 0.0001

Table 2. Association between nummular keratitis and microfilaremia (detected by any of the diagnose methods: Giemsa staining, Knott and polycarbonate membrane filtration and/or PCR).

| Keratitis lesions (horizontal)   | Presence<br>(+) | Absence<br>(-) | Total     |
|----------------------------------|-----------------|----------------|-----------|
| <b>Microfilaremia (vertical)</b> |                 |                |           |
| <b>Positive (+)</b>              | 10 (76,9%)      | 4 (44%)        | 14        |
| <b>Negative (-)</b>              | 3 (23,1%)       | 5 (56%)        | 8         |
| <b>Total</b>                     | 13              | 9              | 22 (100%) |

p-value: 0.1347

Table 3. Association between confocal lesions and microfilaremia (detected by any of the diagnose methods: Giemsa staining, Knott and polycarbonate membrane filtration and/or PCR).

| Confocal lesion (horizontal) | Presence (+)                    | Absence (-) | Total |
|------------------------------|---------------------------------|-------------|-------|
| Microfilaremia (vertical)    | % Circular / Linear / Both      |             |       |
| Positive (+)                 | 2 (25%) / 1 (12,5%) / 5 (62,5%) | 6           | 14    |
| Negative (-)                 | 3 (75%) / 0 / 1 (25%)           | 4           | 8     |
|                              | 12                              | 10          | 22    |

p-value: 0.4266



## 5) ACKNOWLEDGMENTS, COMPETING INTERESTS, FUNDING:

**Acknowledgments:** *Mansonella-Brazil Group:* Belfort Jr RB, Borborema M, Cohen J, Cohen MJ, Cunha P, Fontes G, Martins M, Medeiros JF, Pessoa, FAC, Vianna LMM, Zanelato T

**Competing Interests Statement:** We state that none of the authors have competing interests.

**Funding/Support:** FAPESP (Fundação de Amparo à Pesquisa do Estado de São Paulo or Foundation for Research Support of São Paulo State).

**Contributorship Statement:** We state that all authors contributed in the:

- 1) Conception and design of the study;
- 2) Acquisition, analysis and interpretation of data;
- 3) Drafting and revising of the article;
- 4) Final approval of the version to be published.

**6) REFERENCE LIST:**

1. Branco BC, Chamon W, Belfort R et al. Ocular findings in Pauini (Southwest of the Brazilian Amazon) and possible corneal lesions caused by Mansonella. *Arq Bras Oftalmol.* 1998; Vol 61(6): 647-82.
2. Martins M, Pessoa FA, de Medeiros MB, et al. Mansonella ozzardi in Amazonas, Brazil: prevalence and distribution in the municipality of Coari, in the middle Solimões River. *Mem Inst Oswaldo Cruz.* 2010 May;105(3):246-53.
3. Deane MP. Sobre a incidência de filárias humanas em Manaus, estado do Amazonas. *Rev Serv Esp Saude Publ* 1949 2: 849-858.
4. Oliveira wr. [Filarial infestation in inhabitants of Vila Pereira, territory of Roraima (Brazil)]. *Rev Inst Med Trop Sao Paulo.* 1963 Nov-Dec;5:287-8.
5. D'Andretta Jr, Pio da Silva CM, Kameyana F. Ocorrência da mansonelose entre índios do alto Xingu. *Rev Soc Bras Med Trop* 1969. 3:11.
6. Orihel TC, Eberhard ML. Mansonella ozzardi: a redescription with comments on its taxonomic relationships. *Am J Trop Med Hyg.* 1982 Nov;31(6):1142-7.
7. Morales-Hojas R, Post RJ, Shelley AJ, et al. Characterisation of nuclear ribosomal DNA sequences from *Onchocerca volvulus* and *Mansonella ozzardi* (Nematoda: Filarioidea) and development of a PCR-based method for their

1  
2  
3 detection in skin biopsies. *Int J Parasitol.* 2001 Feb;31(2):169-77. Erratum in: *Int*  
4  
5  
6 *J Parasitol* 2001 Jun;31(8):850-1

- 7  
8  
9  
10 8. Vera LJ, Basano S de A, Camargo J de S, et al. Improvement of a PCR test to  
11  
12 diagnose infection by *Mansonella ozzardi*. *Rev Soc Bras Med Trop.* 2011 May-  
13  
14 Jun;44(3):380-2.  
15  
16  
17  
18  
19  
20 9. Tang TH, López-Vélez R, Lanza M, et al. Nested PCR to detect and distinguish  
21  
22 the sympatric filarial species *Onchocerca volvulus*, *Mansonella ozzardi* and  
23  
24 *Mansonella perstans* in the Amazon Region. *Mem Inst Oswaldo Cruz.* 2010  
25  
26 Sep;105(6):823-8.  
27  
28  
29  
30  
31  
32 10. Degese MF, Cabrera MG, Krivokapich SJ, et al. Contribution of the PCR assay to  
33  
34 the diagnosis of *Mansonella ozzardi* in endemic areas of Argentina. *Rev Argent*  
35  
36 *Microbiol.* 2012 Apr-Jun;44(2):97-100. Spanish. Genetic  
37  
38  
39  
40  
41 11. Marcos LA, Arrospide N, Recuenco S, et al. Genetic Characterization of Atypical  
42  
43 *Mansonella (Mansonella) ozzardi* Microfilariae in Human Blood Samples from  
44  
45 Northeastern Peru. *Am J Trop Med Hyg.* 2012 Sep;87(3):491-4. Epub 2012 Jul  
46  
47 23.  
48  
49  
50  
51  
52  
53  
54  
55  
56  
57  
58  
59  
60

- 1  
2  
3  
4  
5  
6  
7  
8  
9  
10  
11  
12  
13  
14  
15  
16  
17  
18  
19  
20  
21  
22  
23  
24  
25  
26  
27  
28  
29  
30  
31  
32  
33  
34  
35  
36  
37  
38  
39  
40  
41  
42  
43  
44  
45  
46  
47  
48  
49  
50  
51  
52  
53  
54  
55  
56  
57  
58  
59  
60
12. BATISTA D, CERQUEIRA NL, MORAES MA. [Epidemiology of Manson's disease in a locality in the interior of Amazonas]. Rev Assoc Med Bras. 1960 Jun;6:176-84.
  13. Garrido C, Campos M. First report of presumed parasitic keratitis in Indians from the Brazilian Amazon. Cornea. 2000 Nov;19(6):817-9.
  14. Cohen JM, Ribeiro JA, Martins M. Ocular manifestations in mansonelliasis. Arq Bras Oftalmol. 2008 Mar-Apr;71(2):167-71. Portuguese.
  15. Basano S de A, Camargo J de S, Vera LJ, Velasques SN, et al. Investigation of the occurrence of *Mansonella ozzardi* in the State of Rondônia, Western Amazonia, Brazil. Rev Soc Bras Med Trop. 2011 Oct;44(5):600-3. Epub 2011 Aug 26.
  16. Medeiros JF, Py-Daniel V, Barbosa UC, et al. [Occurrence of *Mansonella ozzardi* (Nematoda, Onchocercidae) in riverine communities of the Purus river, Boca do Acre municipality, Amazonas State, Brazil]. Cad Saude Publica. 2009 Jun;25(6):1421-6.
  17. Belfort Jr, R e Moraes, M – Oncocercose ocular no Brasil. AMB Rev Assoc Med Bras. 1979 Apr;25(4):123-7.

1  
2  
3  
4  
5  
6  
7  
8  
9  
10  
11  
12  
13  
14  
15  
16  
17  
18  
19  
20  
21  
22  
23  
24  
25  
26  
27  
28  
29  
30  
31  
32  
33  
34  
35  
36  
37  
38  
39  
40  
41  
42  
43  
44  
45  
46  
47  
48  
49  
50  
51  
52  
53  
54  
55  
56  
57  
58  
59  
60

18. The Onchocerciasis Elimination Program Sauerbrey for the Americas (OEPA) M. Annals of Tropical Medicine & Parasitology, Vol 102, Supplement No. 1 , S25-S29 (2008).

For peer review only

## 7) FIGURE LEGENDS:

**Picture 1.** Clinical features. (Left and bottom) Central irregular “mottled” surrounded by a opaque halo opacitie; (Right) Four typical keratitis lesions. All of them had normal translucent area between the lesions and the limbus, without the presence of corneal neovascularization.

**Picture 2.** Five different patterns of circular lesions measuring about 80  $\mu\text{m}$  in diameter, located sub-epithelial, in different patients. The figures are 400  $\mu\text{m}$  x 400  $\mu\text{m}$ .

**Picture 3.** Filiform lesions located above the epithelium basal layer about 300  $\mu\text{m}$  long and 10  $\mu\text{m}$  wide, with one dichotomized end into a "C" shape and the other tapered, all in the same patient, who had limbal conjunctiva thick blood smear positive for *Mansonella ozzardi*. The figures are 400  $\mu\text{m}$  x 400  $\mu\text{m}$ .

**Picture 4.** Microfilaria as detected by thick blood smear and corneal confocal image from a patient who had both tests performed.

**STROBE 2007 (v4) checklist of items to be included in reports of observational studies in epidemiology\***  
**Checklist for cohort, case-control, and cross-sectional studies (combined)**

| Section/Topic             | Item # | Recommendation                                                                                                                                                                                                                                                                                                                                                                                                                                                         | Reported on page # |
|---------------------------|--------|------------------------------------------------------------------------------------------------------------------------------------------------------------------------------------------------------------------------------------------------------------------------------------------------------------------------------------------------------------------------------------------------------------------------------------------------------------------------|--------------------|
| Title and abstract        | 1      | (a) Indicate the study’s design with a commonly used term in the title or the abstract                                                                                                                                                                                                                                                                                                                                                                                 | 1                  |
|                           |        | (b) Provide in the abstract an informative and balanced summary of what was done and what was found                                                                                                                                                                                                                                                                                                                                                                    | 2-4                |
| <b>Introduction</b>       |        |                                                                                                                                                                                                                                                                                                                                                                                                                                                                        | <b>5</b>           |
| Background/rationale      | 2      | Explain the scientific background and rationale for the investigation being reported                                                                                                                                                                                                                                                                                                                                                                                   | 5                  |
| Objectives                | 3      | State specific objectives, including any pre-specified hypotheses                                                                                                                                                                                                                                                                                                                                                                                                      | 6                  |
| <b>Methods</b>            |        |                                                                                                                                                                                                                                                                                                                                                                                                                                                                        | <b>6, 7</b>        |
| Study design              | 4      | Present key elements of study design early in the paper                                                                                                                                                                                                                                                                                                                                                                                                                | 6                  |
| Setting                   | 5      | Describe the setting, locations, and relevant dates, including periods of recruitment, exposure, follow-up, and data collection                                                                                                                                                                                                                                                                                                                                        | 6                  |
| Participants              | 6      | (a) <i>Cohort study</i> —Give the eligibility criteria, and the sources and methods of selection of participants. Describe methods of follow-up<br><i>Case-control study</i> —Give the eligibility criteria, and the sources and methods of case ascertainment and control selection. Give the rationale for the choice of cases and controls<br><i>Cross-sectional study</i> —Give the eligibility criteria, and the sources and methods of selection of participants | 6, 7               |
|                           |        | (b) <i>Cohort study</i> —For matched studies, give matching criteria and number of exposed and unexposed<br><i>Case-control study</i> —For matched studies, give matching criteria and the number of controls per case                                                                                                                                                                                                                                                 |                    |
| Variables                 | 7      | Clearly define all outcomes, exposures, predictors, potential confounders, and effect modifiers. Give diagnostic criteria, if applicable                                                                                                                                                                                                                                                                                                                               | 6, 7               |
| Data sources/ measurement | 8*     | For each variable of interest, give sources of data and details of methods of assessment (measurement). Describe comparability of assessment methods if there is more than one group                                                                                                                                                                                                                                                                                   | 6, 7               |
| Bias                      | 9      | Describe any efforts to address potential sources of bias                                                                                                                                                                                                                                                                                                                                                                                                              | 6, 7               |
| Study size                | 10     | Explain how the study size was arrived at                                                                                                                                                                                                                                                                                                                                                                                                                              | 6                  |
| Quantitative variables    | 11     | Explain how quantitative variables were handled in the analyses. If applicable, describe which groupings were chosen and why                                                                                                                                                                                                                                                                                                                                           | 7                  |
| Statistical methods       | 12     | (a) Describe all statistical methods, including those used to control for confounding                                                                                                                                                                                                                                                                                                                                                                                  | 7                  |
|                           |        | (b) Describe any methods used to examine subgroups and interactions                                                                                                                                                                                                                                                                                                                                                                                                    | 7                  |
|                           |        | (c) Explain how missing data were addressed                                                                                                                                                                                                                                                                                                                                                                                                                            | 7                  |
|                           |        | (d) <i>Cohort study</i> —If applicable, explain how loss to follow-up was addressed<br><i>Case-control study</i> —If applicable, explain how matching of cases and controls was addressed                                                                                                                                                                                                                                                                              | 6, 7               |

|                          |     |                                                                                                                                                                                                              |      |
|--------------------------|-----|--------------------------------------------------------------------------------------------------------------------------------------------------------------------------------------------------------------|------|
|                          |     | <i>Cross-sectional study</i> —If applicable, describe analytical methods taking account of sampling strategy                                                                                                 |      |
|                          |     | (e) Describe any sensitivity analyses                                                                                                                                                                        | 6, 7 |
| <b>Results</b>           |     |                                                                                                                                                                                                              | 7, 8 |
| Participants             | 13* | (a) Report numbers of individuals at each stage of study—eg numbers potentially eligible, examined for eligibility, confirmed eligible, included in the study, completing follow-up, and analysed            | 7    |
|                          |     | (b) Give reasons for non-participation at each stage                                                                                                                                                         | 7, 8 |
|                          |     | (c) Consider use of a flow diagram                                                                                                                                                                           | 7, 8 |
| Descriptive data         | 14* | (a) Give characteristics of study participants (eg demographic, clinical, social) and information on exposures and potential confounders                                                                     | 7, 8 |
|                          |     | (b) Indicate number of participants with missing data for each variable of interest                                                                                                                          | 7, 8 |
|                          |     | (c) <i>Cohort study</i> —Summarise follow-up time (eg, average and total amount)                                                                                                                             |      |
| Outcome data             | 15* | <i>Cohort study</i> —Report numbers of outcome events or summary measures over time                                                                                                                          |      |
|                          |     | <i>Case-control study</i> —Report numbers in each exposure category, or summary measures of exposure                                                                                                         |      |
|                          |     | <i>Cross-sectional study</i> —Report numbers of outcome events or summary measures                                                                                                                           | 7, 8 |
| Main results             | 16  | (a) Give unadjusted estimates and, if applicable, confounder-adjusted estimates and their precision (eg, 95% confidence interval). Make clear which confounders were adjusted for and why they were included | 7, 8 |
|                          |     | (b) Report category boundaries when continuous variables were categorized                                                                                                                                    | 7, 8 |
|                          |     | (c) If relevant, consider translating estimates of relative risk into absolute risk for a meaningful time period                                                                                             | 7, 8 |
| Other analyses           | 17  | Report other analyses done—eg analyses of subgroups and interactions, and sensitivity analyses                                                                                                               | 7, 8 |
| <b>Discussion</b>        |     |                                                                                                                                                                                                              | 9-11 |
| Key results              | 18  | Summarise key results with reference to study objectives                                                                                                                                                     | 11   |
| Limitations              | 19  | Discuss limitations of the study, taking into account sources of potential bias or imprecision. Discuss both direction and magnitude of any potential bias                                                   | 11   |
| Interpretation           | 20  | Give a cautious overall interpretation of results considering objectives, limitations, multiplicity of analyses, results from similar studies, and other relevant evidence                                   | 9-11 |
| Generalisability         | 21  | Discuss the generalisability (external validity) of the study results                                                                                                                                        | 9-11 |
| <b>Other information</b> |     |                                                                                                                                                                                                              | 14   |
| Funding                  | 22  | Give the source of funding and the role of the funders for the present study and, if applicable, for the original study on which the present article is based                                                | 14   |

\*Give information separately for cases and controls in case-control studies and, if applicable, for exposed and unexposed groups in cohort and cross-sectional studies.

**Note:** An Explanation and Elaboration article discusses each checklist item and gives methodological background and published examples of transparent reporting. The STROBE checklist is best used in conjunction with this article (freely available on the Web sites of PLoS Medicine at <http://www.plosmedicine.org/>, Annals of Internal Medicine at <http://www.annals.org/>, and Epidemiology at <http://www.epidem.com/>). Information on the STROBE Initiative is available at [www.strobe-statement.org](http://www.strobe-statement.org).



1  
2  
3 **PICTURES:**  
4  
5  
6

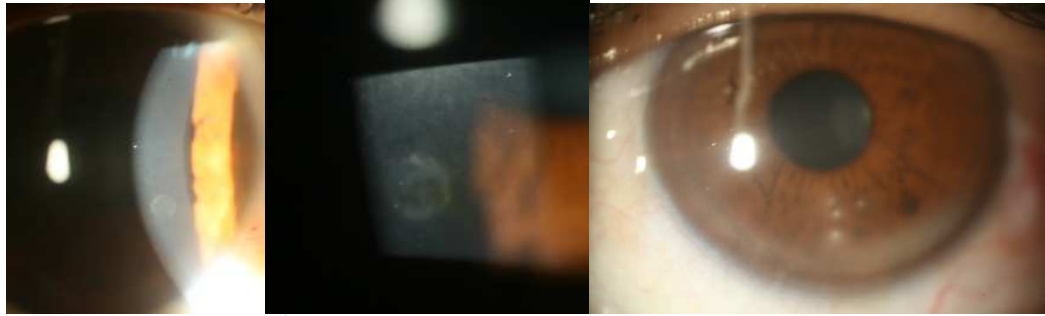

17  
18  
19 Picture 1: Clinical features. (Left and bottom) Central irregular “mottled” surrounded by a  
20 opaque halo opacitie; (Right) Four typical keratitis lesions. All of them had normal  
21 translucent area between the lesions and the limbus, without the presence of corneal  
22 neovascularization.  
23  
24  
25  
26

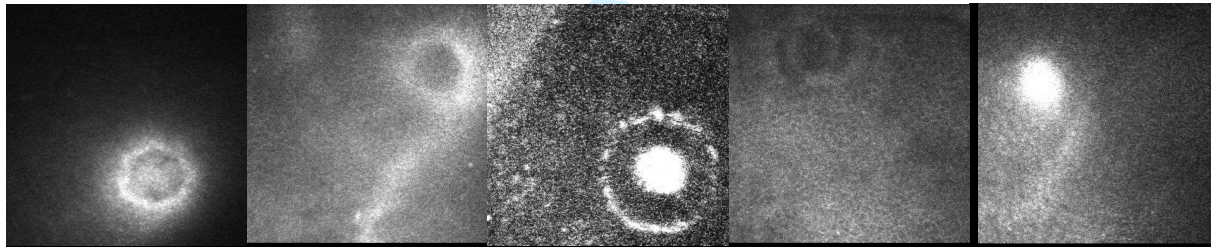

37  
38  
39 Picture 2. Five different patterns of circular lesions measuring about 80 μm in diameter,  
40 located sub-epithelial, in different patients. The figures are 400 μm x 400 μm.  
41  
42  
43  
44  
45  
46  
47  
48  
49  
50  
51  
52  
53  
54  
55  
56  
57  
58  
59  
60



Picture 3. Filiform lesions located above the epithelium basal layer about 300  $\mu\text{m}$  long and 10  $\mu\text{m}$  wide, with one dichotomized end into a "C" shape and the other tapered, all in the same patient, who had limbal conjunctiva thick blood smear positive for *Mansonella ozzardi*. The figures are 400  $\mu\text{m}$  x 400  $\mu\text{m}$ .

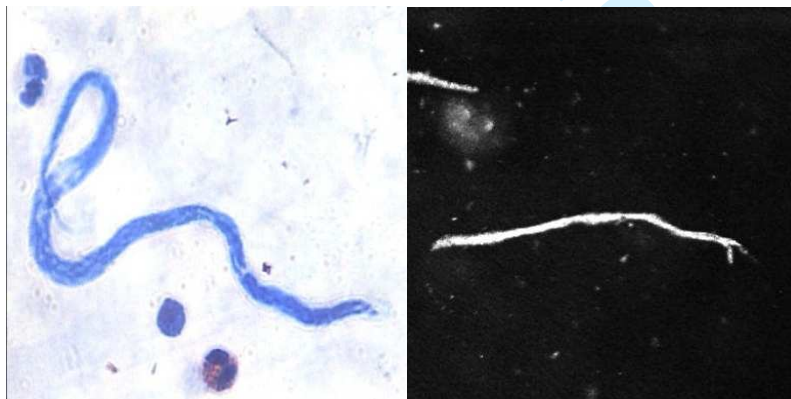

Picture 4. Microfilaria as detected by thick blood smear and corneal confocal image from a patient who had both tests performed.

1  
2  
3  
4  
5  
6  
7  
8  
9  
10  
11  
12  
13  
14  
15  
16  
17  
18  
19  
20  
21  
22  
23  
24  
25  
26  
27  
28  
29  
30  
31  
32  
33  
34  
35  
36  
37  
38  
39  
40  
41  
42  
43  
44  
45  
46  
47  
48  
49  
50  
51  
52  
53  
54  
55  
56  
57  
58  
59  
60

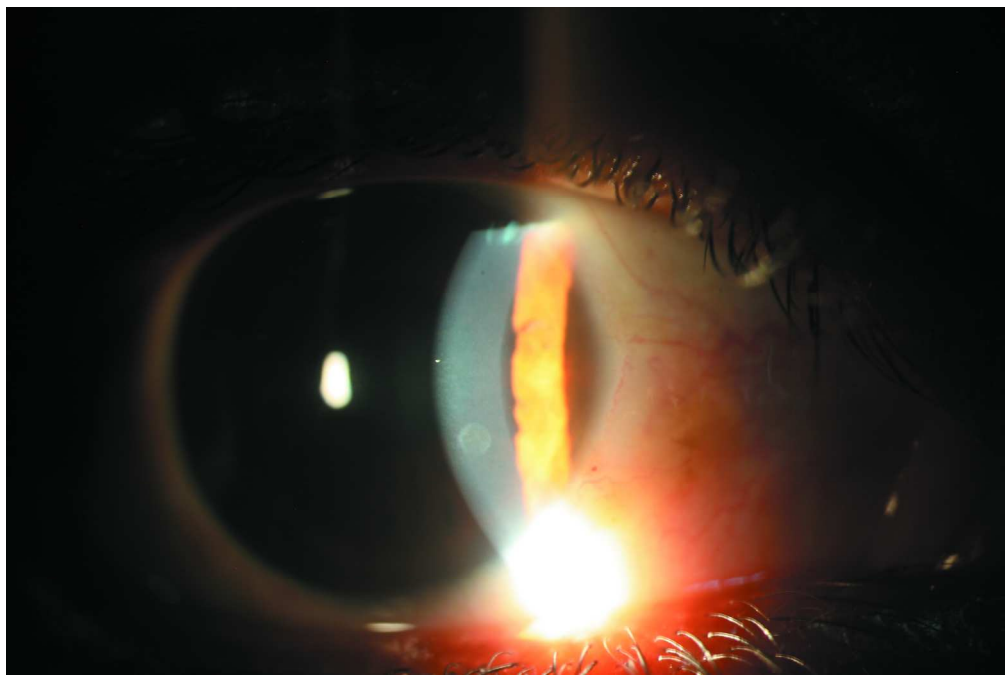

199x133mm (300 x 300 DPI)

Review only

1  
2  
3  
4  
5  
6  
7  
8  
9  
10  
11  
12  
13  
14  
15  
16  
17  
18  
19  
20  
21  
22  
23  
24  
25  
26  
27  
28  
29  
30  
31  
32  
33  
34  
35  
36  
37  
38  
39  
40  
41  
42  
43  
44  
45  
46  
47  
48  
49  
50  
51  
52  
53  
54  
55  
56  
57  
58  
59  
60

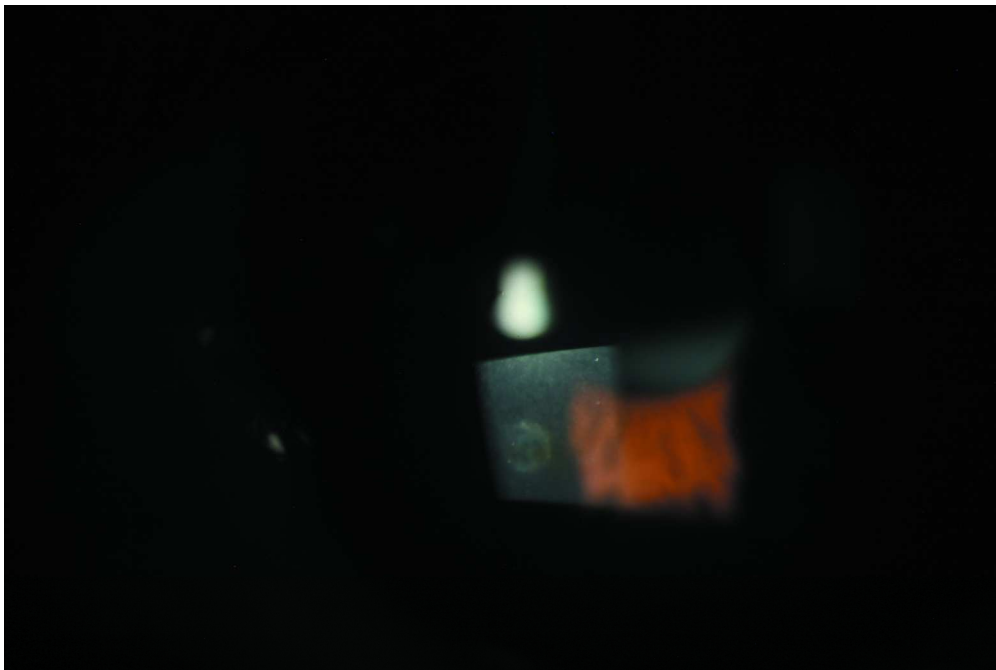

199x133mm (300 x 300 DPI)

Review only

1  
2  
3  
4  
5  
6  
7  
8  
9  
10  
11  
12  
13  
14  
15  
16  
17  
18  
19  
20  
21  
22  
23  
24  
25  
26  
27  
28  
29  
30  
31  
32  
33  
34  
35  
36  
37  
38  
39  
40  
41  
42  
43  
44  
45  
46  
47  
48  
49  
50  
51  
52  
53  
54  
55  
56  
57  
58  
59  
60



199x133mm (300 x 300 DPI)

Review only

1  
2  
3  
4  
5  
6  
7  
8  
9  
10  
11  
12  
13  
14  
15  
16  
17  
18  
19  
20  
21  
22  
23  
24  
25  
26  
27  
28  
29  
30  
31  
32  
33  
34  
35  
36  
37  
38  
39  
40  
41  
42  
43  
44  
45  
46  
47  
48  
49  
50  
51  
52  
53  
54  
55  
56  
57  
58  
59  
60



129x130mm (300 x 300 DPI)



1  
2  
3  
4  
5  
6  
7  
8  
9  
10  
11  
12  
13  
14  
15  
16  
17  
18  
19  
20  
21  
22  
23  
24  
25  
26  
27  
28  
29  
30  
31  
32  
33  
34  
35  
36  
37  
38  
39  
40  
41  
42  
43  
44  
45  
46  
47  
48  
49  
50  
51  
52  
53  
54  
55  
56  
57  
58  
59  
60

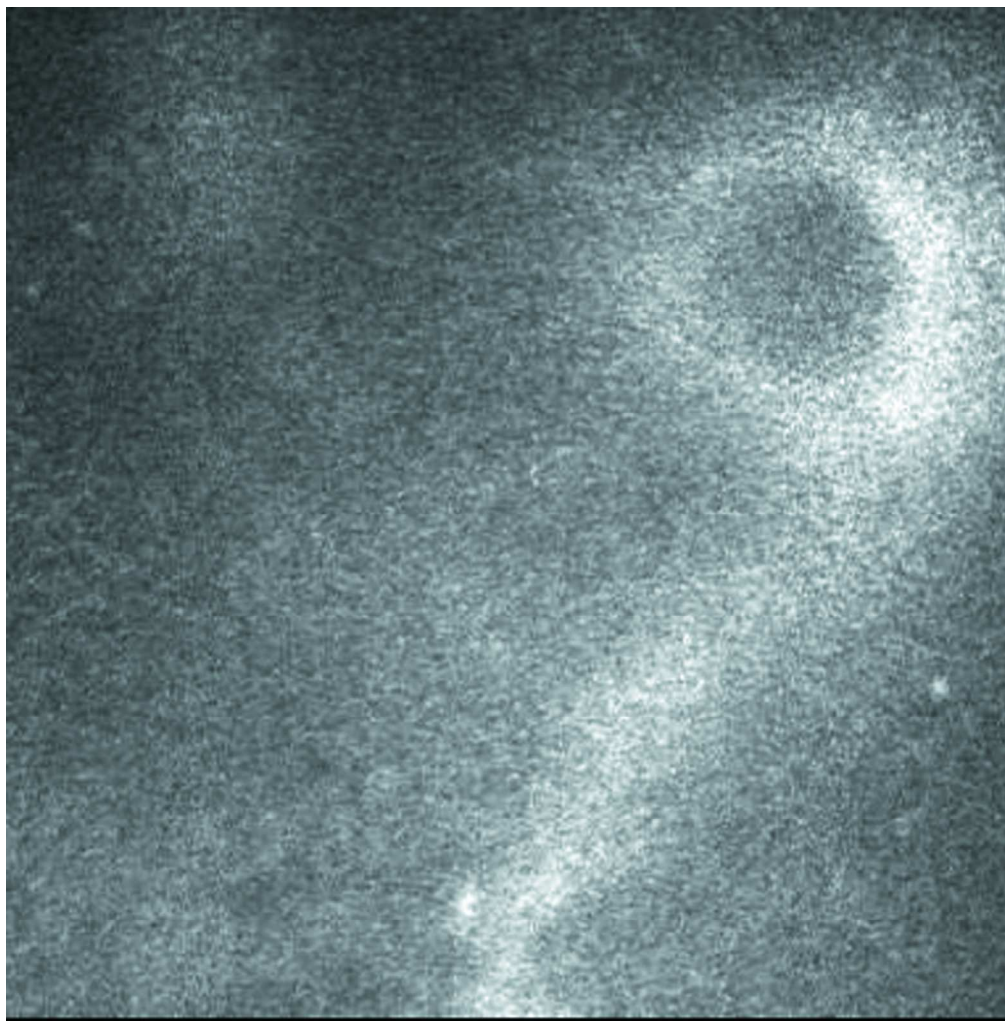

134x135mm (300 x 300 DPI)

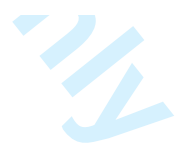

1  
2  
3  
4  
5  
6  
7  
8  
9  
10  
11  
12  
13  
14  
15  
16  
17  
18  
19  
20  
21  
22  
23  
24  
25  
26  
27  
28  
29  
30  
31  
32  
33  
34  
35  
36  
37  
38  
39  
40  
41  
42  
43  
44  
45  
46  
47  
48  
49  
50  
51  
52  
53  
54  
55  
56  
57  
58  
59  
60



134x135mm (300 x 300 DPI)





1  
2  
3  
4  
5  
6  
7  
8  
9  
10  
11  
12  
13  
14  
15  
16  
17  
18  
19  
20  
21  
22  
23  
24  
25  
26  
27  
28  
29  
30  
31  
32  
33  
34  
35  
36  
37  
38  
39  
40  
41  
42  
43  
44  
45  
46  
47  
48  
49  
50  
51  
52  
53  
54  
55  
56  
57  
58  
59  
60



134x135mm (300 x 300 DPI)



1  
2  
3  
4  
5  
6  
7  
8  
9  
10  
11  
12  
13  
14  
15  
16  
17  
18  
19  
20  
21  
22  
23  
24  
25  
26  
27  
28  
29  
30  
31  
32  
33  
34  
35  
36  
37  
38  
39  
40  
41  
42  
43  
44  
45  
46  
47  
48  
49  
50  
51  
52  
53  
54  
55  
56  
57  
58  
59  
60

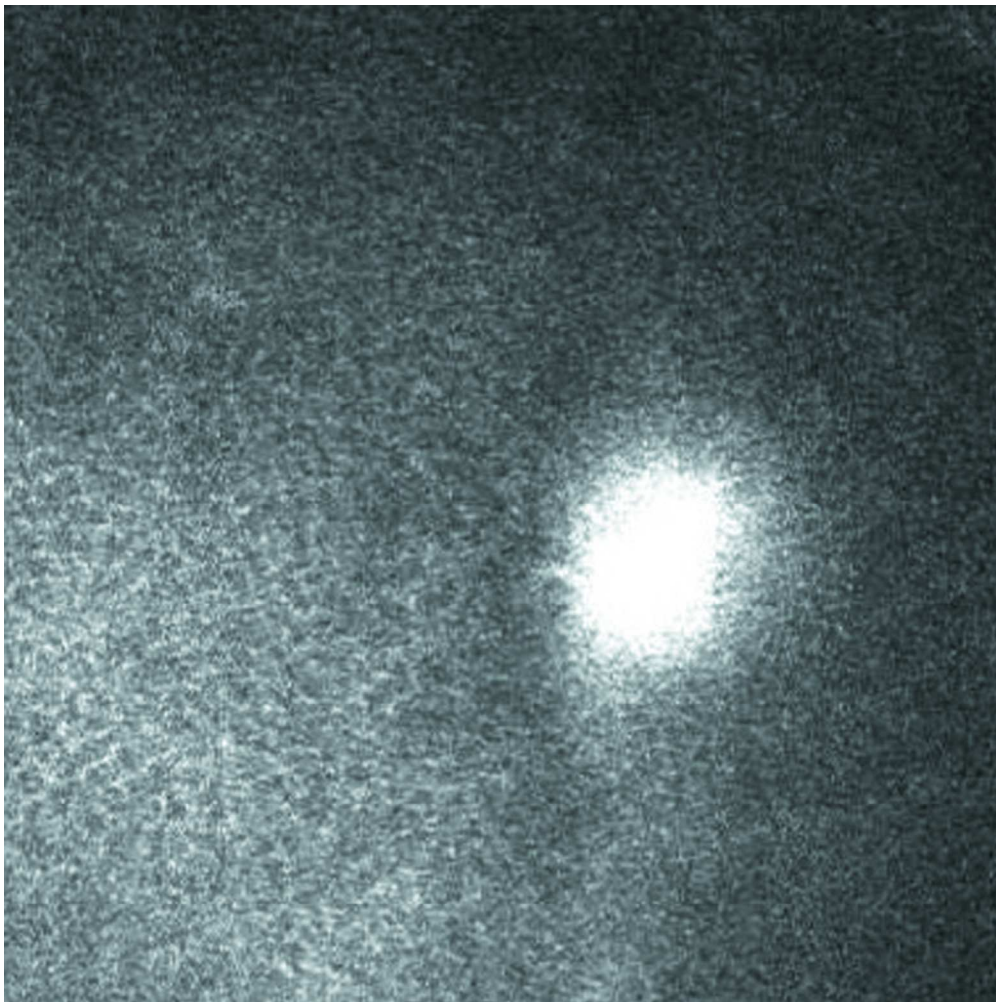

134x133mm (300 x 300 DPI)

BMJ

1  
2  
3  
4  
5  
6  
7  
8  
9  
10  
11  
12  
13  
14  
15  
16  
17  
18  
19  
20  
21  
22  
23  
24  
25  
26  
27  
28  
29  
30  
31  
32  
33  
34  
35  
36  
37  
38  
39  
40  
41  
42  
43  
44  
45  
46  
47  
48  
49  
50  
51  
52  
53  
54  
55  
56  
57  
58  
59  
60

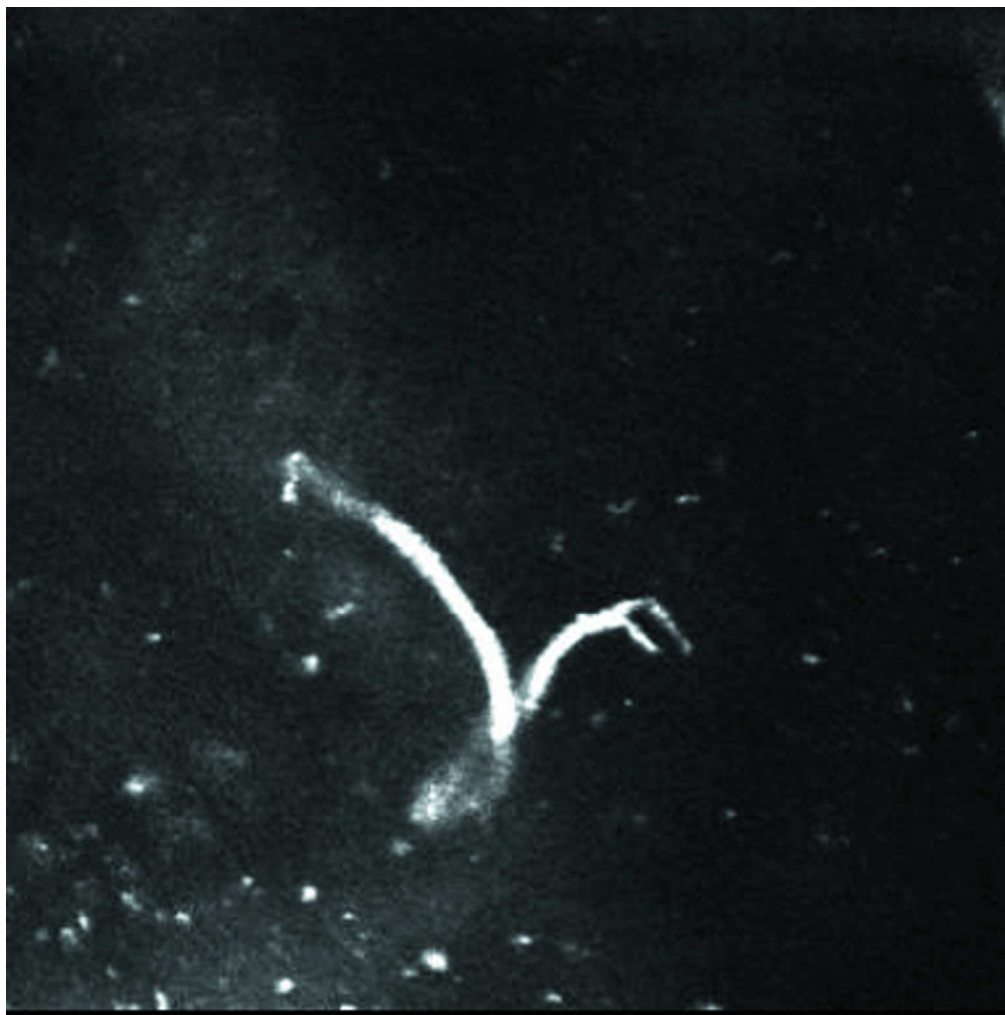

134x135mm (300 x 300 DPI)



1  
2  
3  
4  
5  
6  
7  
8  
9  
10  
11  
12  
13  
14  
15  
16  
17  
18  
19  
20  
21  
22  
23  
24  
25  
26  
27  
28  
29  
30  
31  
32  
33  
34  
35  
36  
37  
38  
39  
40  
41  
42  
43  
44  
45  
46  
47  
48  
49  
50  
51  
52  
53  
54  
55  
56  
57  
58  
59  
60



135x134mm (300 x 300 DPI)

only

1  
2  
3  
4  
5  
6  
7  
8  
9  
10  
11  
12  
13  
14  
15  
16  
17  
18  
19  
20  
21  
22  
23  
24  
25  
26  
27  
28  
29  
30  
31  
32  
33  
34  
35  
36  
37  
38  
39  
40  
41  
42  
43  
44  
45  
46  
47  
48  
49  
50  
51  
52  
53  
54  
55  
56  
57  
58  
59  
60

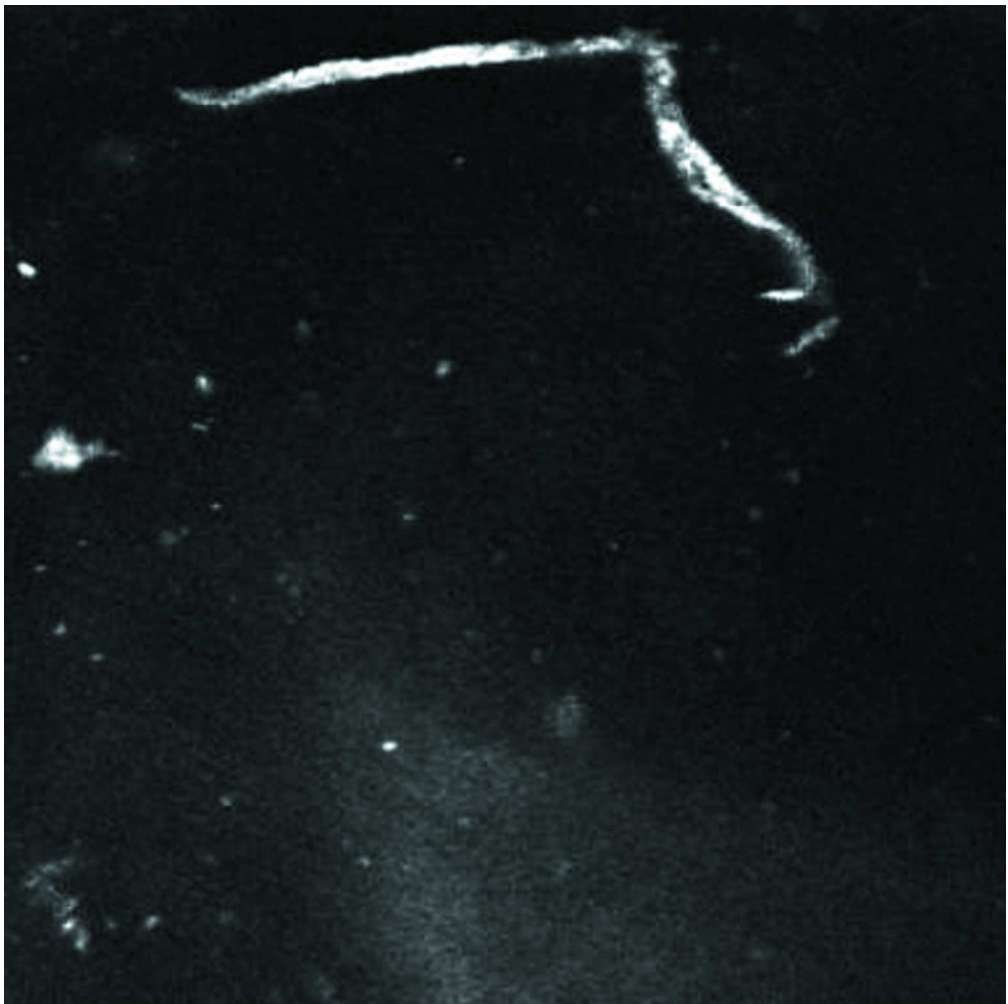

134x134mm (300 x 300 DPI)

BMJ

1  
2  
3  
4  
5  
6  
7  
8  
9  
10  
11  
12  
13  
14  
15  
16  
17  
18  
19  
20  
21  
22  
23  
24  
25  
26  
27  
28  
29  
30  
31  
32  
33  
34  
35  
36  
37  
38  
39  
40  
41  
42  
43  
44  
45  
46  
47  
48  
49  
50  
51  
52  
53  
54  
55  
56  
57  
58  
59  
60

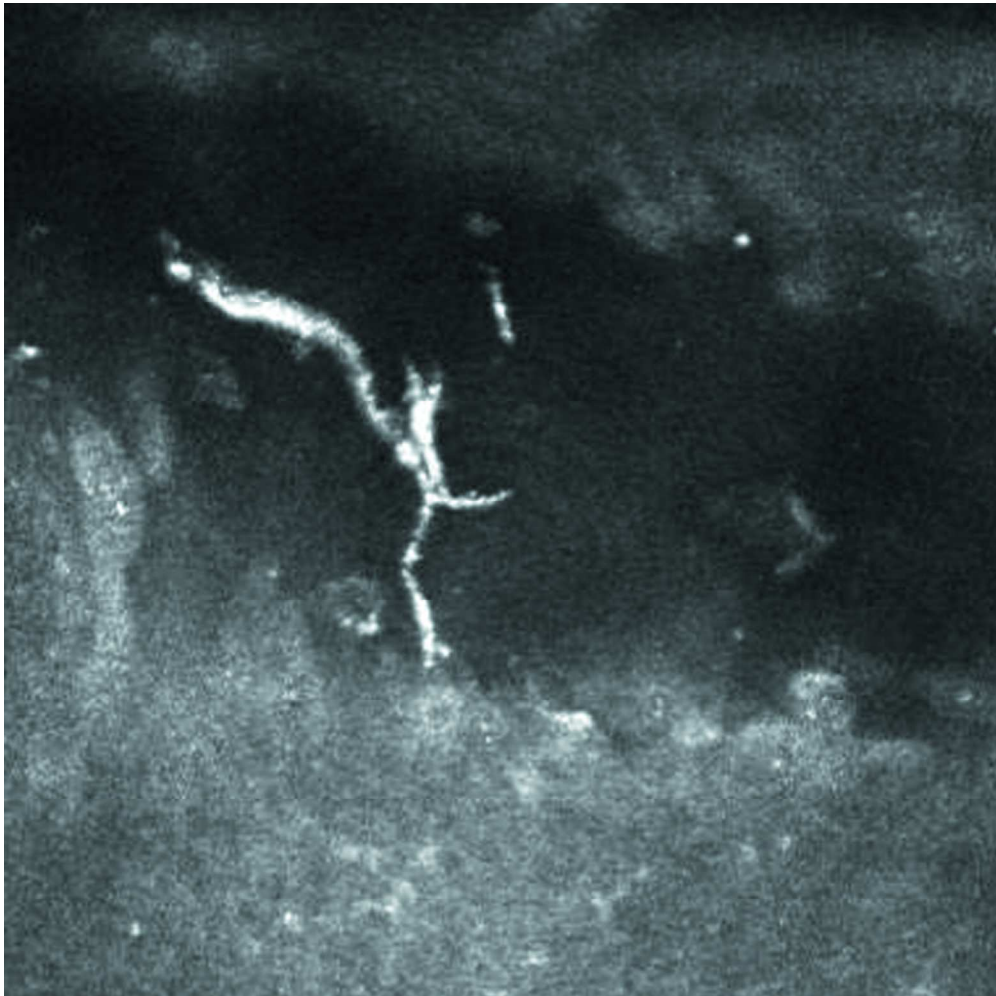

134x134mm (300 x 300 DPI)

BMJ

1  
2  
3  
4  
5  
6  
7  
8  
9  
10  
11  
12  
13  
14  
15  
16  
17  
18  
19  
20  
21  
22  
23  
24  
25  
26  
27  
28  
29  
30  
31  
32  
33  
34  
35  
36  
37  
38  
39  
40  
41  
42  
43  
44  
45  
46  
47  
48  
49  
50  
51  
52  
53  
54  
55  
56  
57  
58  
59  
60



132x133mm (300 x 300 DPI)



1  
2  
3  
4  
5  
6  
7  
8  
9  
10  
11  
12  
13  
14  
15  
16  
17  
18  
19  
20  
21  
22  
23  
24  
25  
26  
27  
28  
29  
30  
31  
32  
33  
34  
35  
36  
37  
38  
39  
40  
41  
42  
43  
44  
45  
46  
47  
48  
49  
50  
51  
52  
53  
54  
55  
56  
57  
58  
59  
60



150x112mm (300 x 300 DPI)

ew only



1  
2  
3  
4  
5  
6  
7  
8  
9  
10  
11  
12  
13  
14  
15  
16  
17  
18  
19  
20  
21  
22  
23  
24  
25  
26  
27  
28  
29  
30  
31  
32  
33  
34  
35  
36  
37  
38  
39  
40  
41  
42  
43  
44  
45  
46  
47  
48  
49  
50  
51  
52  
53  
54  
55  
56  
57  
58  
59  
60



134x134mm (300 x 300 DPI)

univ

1  
2  
3 **Competing Interests and Contributorship Statements:**  
4  
5  
6  
7

8  
9 **Article: *Mansonella ozzardi* corneal lesions in the Amazon**  
10

11  
12 **Authors:** Lucas Monferrari Monteiro Vianna, Marilaine Martins, Marcos Jacob Cohen,  
13  
14 Jacob Cohen, Rubens Belfort Jr  
15  
16

17  
18  
19  
20 **Statetment:**  
21

22 We state that none of us have competing interests.  
23

24 We also state that all of us contributed in the conception and design of the study,  
25 acquisition, analysis and interpretation of data, drafting and revising of the article and  
26  
27 the final approval of the version to be published.  
28  
29  
30  
31  
32  
33  
34  
35  
36  
37  
38  
39  
40  
41  
42  
43  
44  
45  
46  
47  
48  
49  
50  
51  
52  
53  
54  
55  
56  
57  
58  
59  
60
